# Supplementary material for: Circuit mechanisms underlying embryonic retinal waves
Source: eLife. 2023 Feb 15;12:e81983. doi: 10.7554/eLife.81983 (PMC9988258; doi:10.7554/eLife.81983)
Supplement: Figure 1—source data 1. [file elife-81983-fig1-data1.xlsx]

## Sheet: Sheet1
Inter-transient-interval, wave area, and wave speed per retina (Figure 1E & G, 3D & E)
inter-transient-interval					wave area					wave speed
Retina 1	Retina 2	Retina 3	Retina 4		Retina 1	Retina 2	Retina 3	Retina 4		Retina 1	Retina 2	Retina 3
304.211	134.908	757.2	1646.4		44.6298	22.2688	24.2775	63.4259		174.166	135.984	181.436
304.529	140.304	220.8	639		28.0596	36.7486	46.8336	55.5674		183.944	164.142	202.219
487.827	146.15	220.8	489.6		27.0809	31.4629	35.639	62.1083		192.19	177.775	136.184
1463.48	140.304	220.8	1224		33.0468	47.7852	59.7705	50.6885		162.261	197.15	178.137
280.781	129.911	110.4	639		37.5064	28.0197	50.0156	70.4297		189.837	163.521	166.462
304.211	344.667	73.6	408		46.9106	28.6897	74.1367	69.6106		237.337	192.592	239.406
270.41	387.75	523.44	489.6		48.0681	34.3104	63.495	36.0399		179.243	156.152	277.753
270.41	352.8	220.8	1092.6		49.6681	31.2488	52.3318	28.5019		165.681	199.893	212.892
270.41	152.504	220.8	935.2		52.9362	39.745	51.278	44.397		144.522	186.146	302.353
345	116.92	220.8	544.4		29.9149	10.9157	50.4851	73.1956		182.066	179.771	241.741
295.714	387.75	220.8	400.8		25.0213	27.7778	55.5451	78.4663
187.207	258.5	220.8	639		26.2468	39.2797	63.1403	61.5859
187.207	238.615	220.8	169.6		42.8511	36.1344	50.892	43.1743
243.369	344.667	73.6	489.6		29.1745	38.191	53.3229	74.4658
221.245	352.8	338.4	319.2		47.2085	27.8522	53.3229	74.4658
202.808	288.655	300.8	618.8		17.8383	19.0396	45.2582	73.0294
270.41	120.952	270.72	1783.2		75.0043	24.772	19.8018	60.2802
304.211	134.908	220.8	262.8		59.166	36.3484	17.6839	72.5071
230	129.911	220.8	381.6		17.5745	14.6101	52.5404	71.5693
168.696	146.15	220.8	400.8		45.1319	28.0756	15.7121	65.3371
183.08	152.504	484.4	233.314		16.7404	12.2092	12.1961	64.3162
166.474	129.911	484.4	217.76		56.4426	22.8457	52.2274	69.1833
196.158	116.92	1308.6	280.56		9.88085	47.4874	52.2274	21.4981
175.385	116.92	220.8	426		85.6426	35.9855	55.6495	62.5356
139.571	113.148	338.4	262.8		10.0596	28.1314	38.1221	72.7802
139.571	116.92	229.938	169.6		48.4851	33.6311	37.8717	71.2963
128.089	113.148	224.314	319.2		47.5745	7.92853	50.9129	62.2388
128.089	113.148	196.275	262.8		21.983	35.911	18.1847	68.566
143.158	113.148	177.66	381.6		28.4851	41.5503	27.3344	71.8542
152.106	113.071	154.487	320.4		31.6596	43.5139	42.7647	53.9292
135.205	113.071	148.05	256.32		61.6766	37.614	36.0981	51.3414
135.205	113.071	220.8	408.3		58.4511	72.5945	29.9844	58.7488
243.369	146.05	220.8	145.662		12.5617	42.909	60.3026	71.5693
219.304	206.188	220.8	145.617		45.8553	47.1245	60.3026	22.5665
172.902	307.92	1308.6	128.815		31.7106	81.7327	52.0083	20.8808
123.002	518.64	872.4	119.614		46.5787	86.0413	37.8612	57.4668
126.312	387.75	541.44	115.49		39.7787	71.8035	35.3782	56.7308
126.312	387.75	541.44	176.274		67.7617	73.3948	50.8816	64.8267
143.537	206.8	872.4	189.6		77.617	28.057	34.2201	58.084
150.372	182.471	110.4	262.8		63.0894	40.9641	29.7757	31.7308
157.891	211.68	523.44	262.8		32.9617	42.4158	6.36411	73.4568
170.776	186.776	300.8	351.2		48.6128	41.7458	39.1445	60.2445
127.14	158.76	227.84	489.6		53.5319	31.5652	36.1294	50.9259
124.88	151.2	201.035	148.4		64.6213	35.5388	52.4778	50.9615
124.88	158.76	179.874	148.4		12.9957	37.4465	23.5576	11.3485
131.817	113.148	154.487	254.4		11.2511	38.9819	31.7684	65.7764
121.685	113.148	148.05	254.4		56.3234	47.3758	28.1794	54.4872
121.685	116.92	142.128	262.8		9.14043	41.3735	39.5722	27.8371
128.089	134.908	131.6	401.76		65.4383	9.50121	36.5363	49.5964
121.685	146.15	220.8	183.086		25.8894	42.9834	32.1022	46.7236
121.685	113.148	220.8	169.08		49.2766	38.9168	50.9546	68.661
141.134	109.612	902.4	217.76		26.9277	84.6454	19.5827	49.5726
149.436	109.612	676.8	147.2		26.9872	73.7298	44.4236
117.873	109.612	379.95	133.6		19.0043	21.8035	46.0407
101.865	109.612	276.327	155.867		23.7021	62.3767	42.9004
105.26	113.148	338.4	127.527		48.2809	6.70947	34.2827
108.89	113.148	414.171	116.72		39.2255	53.1547	29.5879
105.26	113.148	436.2	133.968		21.0128	42.2576	27.1049
108.89	106.218	373.886	131.4		67.8043	52.2334
112.779	106.218	249.1	371.486		83.4468	84.5989
112.779	113.071	192.667	400.8		82.2894	84.9618
102.532	129.822	173.4	131.4		90.4085	80.4951
117.722	159.327	150.783	127.2		88.8851	82.5051
144.477	219.075	148.05	349.714		82.5191	63.9122
411.604	370.457	142.128	306		86.3149	55.7789
120.323	817.2	142.128	349.714		9.00426	12.3023
120.323	642.8	131.6	489.6		85.6426	65.3639
113.745	385.68	122.566	408		10.0085	14.9451
109.195	482.1	220.8	489.6		75.5574	68.6209
88.0604	385.68	220.8	1224		82.2979	67.0482
85.3085	314.571	1308.6	612		37.0213	79.4807
90.4538	283.8	551.52	2002.8		48.3745	74.1299
84.6181	340.56	303.96	564.3		31.0213	53.257
93.6843	344.667	233.815	182.4		49.0043	74.5952
91.2568	238.615	217.114	262.8		38.9957
83.2048	151.2	233.815	262.8		76.4511
85.3462	158.76	298.92	334.8		59.9234
85.3462	167.116	250.691	197.169		77.8213
85.3462	151.2	250.691	281.8		78.2723
87.7169	151.2	217.114	183.086		78.5447
90.2231	144.9	182.526	161.029		15.4298
92.8768	106.291	173.4	150.626		38.8085
92.8768	106.291	150.783	140.857		7.65957
90.8143	116.92	150.783	152.243		16.9191
99.3281	116.92	136.704	159.486		42.0766
102.532	120.952	136.704	448.8		39.1404
132.437	113.148	126.943	248.4
206.99	106.291	118.48	147.663
424.671	106.291	111.075	124.044
1654.04	109.612	220.8	152.236
104.454	109.612	220.8	218.057
100.723	109.575	220.8	254.4
94.1335	109.575	220.8	190.8
94.1335	109.575	220.8	222.545
82.2724	106.218	1308.6	113.769
80.0489	103.094	344.7	127.527
82.2724	113.071	253.3	233.8
82.2724	125.186	189.975	187.04
92.5565	146.05	202.64	187.04
87.4387	166.914	202.64	188.308
76.4584	342.267	217.114	204
77.0198	648.3	202.64	272
73.4374	964.2	189.975	306
78.9453	482.1	192.667	612
80.9695	482.1	173.4	612
83.1003	1502.4	165.143	489.6
78.9453	500.8	150.783	612
83.1003	361.5	155.4	612
83.6447	361.5	142.45	612
93.4853	413.143	142.45	489.6
96.3182	482	126.943	2002.8
102.532	124.2	114.658	437.04
117.722	456	111.075	2002.8
127.14	282	107.709	631.2
498.353	243.257	220.8	473.4
424.671	212.85	220.8	234
169.785	189.2	1308.6	200.88
185.113	170.28	220.8	169.08
226.31	139.152	220.8	187.867
85.3085	144.95	220.8	142.4
91.5336	132.3	1308.6	138.576
86.3031	124.2	344.7	138.576
87.112	115.92	276.327	134.677
82.2724	112.181	231.28	120.745
77.9423	105.382	217.114	133.968
81.5	105.382	202.64	384.686
81.5	103.165	189.975	187.04
83.6447	106.291	204	145.617
90.8143	113.148	204	140.28
93.4853	106.291	192.667	147.2
90.8143	109.612	192.667	136
72.2386	116.92	173.4	155.867
69.0978	106.291	162.8	155.684
71.7684	106.291	155.4	134.455
73.4374	103.129	136.752	138
75.186	103.129	136.752	174.857
77.0198	103.129	136.708	133.6
77.5244	106.255	118.48	152.243
77.5244	109.575	114.658	175.08
79.4625	109.537	107.709	257.631
81.5	120.869	104.541	408
83.6447	116.84	220.8	612
79.4625	134.815	1308.6	408
81.5	140.208	1308.6	612
99.3281	152.4	1308.6	612
102.532	213.415	1308.6	489.6
105.95	432.2	1308.6	194.585
109.603	964.2	1308.6	168.64
125.572	642.8	379.95	194.585
156.965	440.4	337.733	612
218.247	482	298.92	389
223.027	321.333	233.815	349.714
88.8414	337.867	189.975	262.8
88.8414	304.08	182.526	234
86.3031	321.333	192.667	286.971
83.9058	482	204	197.169
80.0489	456	192.667	170.88
79.4625	345.086	216.75	160.2
77.5244	345.086	221.92	126.709
77.5244	238.615	189.933	116.72
77.5244	243.257	148.643	109.425
81.5	212.85	131.644	106.109
83.6447	189.2	131.644	102.988
83.6447	165.657	131.644	119.614
72.2386	133.8	122.566	128.815
72.2386	139.152	118.48	128.815
75.6786	127.008	111.075	128.815
77.5244	119.917	104.541	133.968
76.8763	105.382	101.554	158.28
75.7045	105.382	220.8	146.4
75.7045	105.382	1308.6	138.695
75.7045	102.282	1308.6	152.243
81.5	102.282	1308.6	150.818
81.5	103.165	919.2	172.145
77.5244	109.612	1308.6	184
77.5244	109.612	919.2	152.965
72.2386	100.217	551.52	134.677
72.2139	103.129	344.7	176.274
75.6786	106.255	303.96	104.667
77.5244	109.612	217.114	89.3143
75.6786	106.255	189.975	272
84.8459	103.129	168.867	252.96
82.6131	103.129	192.667	296.945
82.5845	106.255	204	489.6
101.268	106.255	192.667	612
120.742	109.575	221.92	612
105.779	120.869	227.92	168.64
127.991	125.186	170.94	140.533
88.2916	129.822	142.176	180.686
85.9054	140.208	126.943	489.6
83.9058	140.208	122.566	182.4
77.5244	140.208	122.566	389
75.6786	252.218	122.566	291.75
75.6786	967.2	118.48	389
77.5244	802.8	111.075	702
77.5244	481.68	107.709	334.8
75.6786	440.4	101.554	183.086
81.5	304.08	101.554	163.2
83.6447	241.292	1207.2	174.857
83.6447	241.292	1308.6	163.2
81.5	261.4	1308.6	121.2
75.6786	361.5	919.2	112.955
75.6786	361.5	919.2	100.046
77.5509	333.257	1308.6	92.1474
77.5509	282.933	220.8	97.2667
75.7045	318.3	459.6	100.046
77.5509	366.514	393.943	109.425
81.5279	402.6	253.3	106.109
81.5279	481.8	233.815	100.046
79.4897	490.6	202.64	106.109
79.4897	261.969	178.8	116.72
73.9186	243.257	204	130.608
72.2139	217.425	204	155.486
70.6091	183.095	204	142.4
73.8933	151.252	199.36	129.689
72.9816	128.844	175.906	167.46
71.323	124.243	152.609	233.229
74.7193	124.2	136.708	129.689
76.5417	119.917	122.566	129.689
80.4669	102.282	126.943	209.325
78.4552	99.36	118.48	117
78.4552	102.282	114.658	223.12
84.8165	102.282	114.658	125.057
90.3146	102.282	111.075	159.164
102.357	102.282	104.541	306
113.73	103.165	101.554	612
103.718	103.165	101.554	489.6
107.559	106.291	101.554	281.067
88.2916	100.217	1308.6	170.88
111.696	103.129	919.2	229.964
83.6447	103.129	919.2	281.067
79.4625	106.255	1308.6	284.8
79.4625	100.183	220.8	816
79.4625	103.129	120.4	2185.2
77.5244	106.255	459.6	408
75.6786	106.255	275.76	256.32
72.2386	106.255	202.64	233.018
72.2386	109.575	217.114	284.8
70.6333	120.869	217.114	254.4
73.9186	125.186	241.6	262.8
75.6786	120.869	223.108	168.96
79.4353	129.822	256.062	349.714
81.5	140.208	213.675	168.96
81.4721	140.208	199.36	188.308
81.5	189.2	157.389	204
81.5	648.3	129.264	144.467
81.5	817.2	126.943	165.9
81.5	432.2	122.566	158
81.5	401.4	118.48	165.9
81.5	314.571	122.566	145.617
81.5	241.292	118.48	116.72
81.5	184.518	107.709	109.425
79.4625	184.6	104.541	109.425
77.5244	241.292	104.541	90.8
73.8933	276.436	101.554	92.1474
69.0741	276.436	101.52	92.1474
69.738	276.436	101.554	92.1474
72.9816	299.6	101.554	97.2667
71.323	363.771	167.4	106.109
71.3477	363.771	55.2	100.046
69.7622	363.771	241.9	106.109
73.0069	424.4	1308.6	125.057
76.5417	588.72	919.2	126.471
76.5417	622.8	919.2	128.044
74.7193	387.75	220.8	136.2
74.7193	258.5	120.4	131.156
80.4669	193.267	189.3	145.617
78.4552	128.844	315.382	139.55
85.2972	139.152	231.28	112.955
93.0515	139.152	204.071	129.689
102.056	124.243	247.8	140.064
103.881	119.959	217.114	125.057
103.881	105.382	241.7	120.745
108.307	105.382	263.673	162.743
180.841	96.6	246.218	272
79.4625	91.5158	230.031	306
79.4625	91.5158	169.275	196.871
79.4625	91.5158	157.02	196.871
77.5244	96.6	126	168.64
75.6786	96.6	112	158.1
72.2386	93.9892	105	176.716
70.6333	97.4333	101.818	159.886
70.6333	97.4333	105.677	233.018
69.0978	94.8	107.673	612
70.6091	92.3053	104.506	222.545
70.6091	100.183	101.52	256.32
72.2139	106.255	104.506	427.2
79.4353	100.183	101.52	427.2
79.4625	100.183	101.52	256.2
81.5	100.183	101.52	131.4
81.5	103.129	101.554	218.057
81.5	106.255	190.875	222.545
81.5	106.255	310.4	163.2
81.5	106.255	167.4	153
81.5	116.84	55.2	152.965
81.5	120.869	55.2	136.863
81.5	109.875	55.2	142.4
77.5244	113.419	1370.4	142.4
77.5244	134.815	2617.2	122.057
70.6333	159.327	2617.2	97.2667
69.738	166.914	120.4	97.2667
68.222	200.329	578.2	100.046
72.9816	483.6	315.382	104.153
71.3477	446.4	266.862	90.8
68.2456	235.745	247.8	90.8
69.7622	230.314	266.862	92.1474
71.3477	379.95	231.28	92.1474
73.0069	209.12	202.64	94.6378
72.9816	184.6	233.815	97.2667
72.9816	172.38	233.815	102.988
72.9816	196.05	190.05	109.425
74.7193	233.908	153.886	111.64
74.7193	233.908	142.435	123.471
76.5417	276.327	120	119.214
84.2279	276.327	101.52	114.232
86.5675	363.771	93.5053	110.662
89.0409	424.4	93.5053	122.11
100.53	424.4	98.7	126.471
103.881	364.56	91.1077	104.153
128.144	481.2	91.1077	104.153
206.564	463.2	98.7	107.309
620.673	463.2	101.52	112.955
77.5244	305.4	98.7	120.745
77.5244	305.4	98.7	142.4
77.5244	1813.2	96.0324	218.85
77.5244	1813.2	96.0324	194.533
73.9186	1813.2	93.5053	145.9
72.2386	830.4	174.988	155.345
72.2386	387.75	200.143	257.446
72.2386	238.615	83.7	176.147
70.6091	186.776	167.4	157.091
70.6091	124.243	214.56	136.2
70.6091	115.96	167.4	181.895
70.6091	119.959	334.8	489.6
75.6786	128.844	334.8	204
77.5244	115.96	167.4	256.32
77.5244	102.282	55.2	148.32
77.5244	102.282	685.2	131.4
77.5244	96.6	113.24	220.8
79.4625	93.9892	55.2	204
79.4625	91.5158	693.84	157.714
79.4625	91.5158	495.6	211.04
79.4625	91.5158	346.92	168.6
75.6786	91.5158	289.1	170.88
75.6786	91.5158	266.862	142.4
77.5244	97.4333	231.28	136.704
69.0978	97.4333	222.225	106.8
68.222	94.8	189.52	95.7081
66.7936	94.8	212.031	93.1895
69.7622	100.183	246.109	93.1895
68.2456	100.183	193.371	98.3667
68.2456	97.4	153.886	90.8
68.2456	97.4	134.65	90.8
69.7622	100.183	114.619	90.8
69.7622	100.183	101.52	93.0333
69.7622	103.129	88.83	94.6378
71.323	103.129	84.6	97.2667
74.7193	106.255	86.6634	95.6914
74.7193	116.84	91.1077	101.177
72.9816	120.869	91.1077	120.933
71.323	113.419	91.1077	138.288
76.0105	113.419	98.7	128.044
82.0114	134.815	101.52	111.523
82.0114	175.26	93.5053	114.232
84.2279	184.484	91.1077	111.523
91.6598	173.4	93.5053	101.682
107.463	255.067	91.1077	95.7081
138.238	367.2	113.24	93.1895
187.057	224.954	154.418	110.662
220.442	200.329	148.74	125.057
77.5244	253.3	254.727	129.689
77.5244	241.292	186.327	116.72
75.6786	164.171	170.8	134.677
75.6786	181.453	467.1	134.677
73.9186	184.518	622.8	120.745
72.2386	190.05	622.8	120.745
73.8933	202.72	521.04	185.933
73.8933	233.815	651.3	152.127
72.2139	321.2	55.2	132.923
70.6091	318.3	276	128
70.6091	363.771	276	128
72.2386	321.2	685.2	211.275
75.6786	364.56	868.4	197.169
77.5244	320.8	868.4	233.018
77.5244	463.2	276	816
77.5244	279.2	276	58.8
77.5244	366.343	109.587	381.6
77.5244	305.4	2616	261.2
79.4625	1813.2	2616	56.4
79.4625	758	1308	220.8
79.4625	622.8	1308	272.1
73.9186	368.1	665.76	189.867
75.6786	238.615	433.65	148.591
72.2386	151.2	416.1	148.591
69.0978	124.243	315.382	122.057
69.0978	112.219	266.862	104.764
68.2456	112.219	222.225	107.309
68.2456	124.243	218.677	101.177
68.2456	112.219	246.109	101.177
68.2456	99.36	315.867	104.662
69.7622	99.36	172.421	104.153
69.7622	93.9892	131.04	90.8
69.7622	93.9892	114.619	90.8
68.2456	91.5158	98.7	90.8
72.9816	91.5158	93.5053	90.8
74.7193	91.5158	88.83	93.1895
74.7193	91.5158	80.7545	90.8
71.323	91.5158	78.96	93.1895
71.323	91.5158	80.7545	119.214
72.5005	103.165	80.7545	172.86
77.9108	100.217	84.6	204.075
77.9108	92.3053	84.6	144.05
82.0114	97.4333	86.6634	111.523
85.9348	94.7676	82.6326	95.7081
88.3219	100.183	82.6326	93.1895
102.567	100.183	82.6326	88.53
116.12	103.129	84.6	86.3707
130.886	97.4	113.24	93.1895
176.246	100.183	113.24	104.153
75.6786	100.183	135.888	101.177
75.6786	103.129	135.218	94.6378
75.6786	103.129	148.74	109.425
77.5244	109.575	174.988	129.689
75.6526	116.84	203.6	125.057
73.8933	120.869	373.68	140.064
73.8933	120.869	373.68	204.075
73.8933	113.419	266.914	176.147
73.8933	113.071	217.1	152.127
70.6091	166.914	289.467	251.169
70.6333	198.675	167.4	192.071
72.2386	231.2	334.8	408.15
75.6786	440.64	373.68	489.6
77.5244	550.8	384.686	489.6
77.5244	200.329	372.171	1224
77.5244	165.657	372.171	2185.2
77.5244	151.252	651.3	195.9
77.5244	276.436	685.2	261.2
77.5244	196.05	685.2	169.886
79.4625	174.267	276	155.486
77.5244	196.05	84.6	204.075
73.9186	217.114	2616	148.591
72.2386	217.114	2616	136.704
70.6333	217.114	2616	136.704
67.6276	217.114	2616	126.578
67.6276	289.08	1308	108.037
63.57	321.2	872	110.662
66.7936	303.84	554.8	110.662
68.2456	412.971	554.8	111.64
69.7622	506.4	475.543	136.05
69.7622	276.218	289.1	111.523
69.7622	233.723	247.8	93.1895
69.7622	239.486	218.677	90.8
69.7622	372.533	284.28	90.8
72.9816	831.6	218.4	90.8
74.7193	1813.2	142.435	90.8
74.7193	758	118.44	88.53
72.2634	415.2	101.52	90.8
72.2634	311.4	93.5053	108.037
69.1215	198.45	88.83	148.643
70.6575	158.76	80.7545	225.44
77.5509	115.96	80.7545	153.709
77.5509	112.219	78.96	96.0333
81.5279	115.96	78.96	88.53
85.9348	124.243	78.96	88.53
88.3219	115.96	78.96	86.3707
93.5173	102.282	78.96	86.3707
99.3621	99.36	80.7545	86.3707
168.054	93.9892	78.96	90.8
73.9186	91.5158	77.2435	86.3707
73.9186	91.5158	78.96	88.53
75.6786	91.5158	80.7545	109.425
77.4978	91.5158	84.6	125.057
77.4978	91.5158	117.145	152.236
73.8933	91.5158	121.329	192.071
73.8933	91.5158	135.888	170.88
73.8933	94.8	141.55	185.933
73.8933	100.217	146.857	167.34
72.2139	103.165	174.988	296.836
70.6333	94.7676	171.333	233.229
73.9186	97.4	232.8	408.15
75.6786	106.255	244.65	612
77.5244	103.129	204.96	612
77.5244	106.255	241.9	612
77.5244	103.129	207.343	408
77.5244	94.7676	236.836	427.2
77.5244	92.2737	868.4	220.8
75.6786	97.4	334.8	169.846
77.5244	100.183	934.2	155.486
79.4625	113.11	372.171	108.84
73.9186	113.071	185.68	125.585
72.2386	120.869	185.68	117.848
66.2187	116.84	299.2	100.518
64.8673	106.218	521.04	120.933
66.2414	116.84	384.686	130.608
66.7936	159.327	384.686	125.585
66.7936	163.02	448.8	111.523
66.7936	162.171	138	111.794
69.7622	283.8	112.8	116.607
69.7622	283.8	1308	135.264
69.7622	158.127	1308	93.4378
68.2456	124.243	872	93.1895
69.7622	133.8	1308	90.8
69.738	155.64	872	90.8
72.2634	136.383	654	88.53
72.2634	142.582	654	88.53
72.2634	184.518	654	88.5
70.6575	202.64	654	88.5
72.2634	194.475	654.3	86.43
72.2634	163.768	332.133	86.3707
77.5509	155.58	284.073	110.284
77.5509	151.98	252	111.523
79.4897	168.867	156	86.3707
79.4897	209.55	121.333	84.3143
83.6734	233.723	101.52	84.3143
88.3219	217.029	96.0324	82.3535
96.3512	178.729	88.83	82.3535
127.184	186.267	80.7545	82.3535
75.6526	223.52	80.7545	86.3707
75.6526	356.133	80.7545	88.53
75.6526	345.257	78.96	88.53
75.6526	463.2	78.96	93.1895
77.4978	91.5158	78.96	125.057
75.6526	1813.2	78.96	133.968
73.8933	1137	78.96	186.067
73.8933	1034	78.96	204.075
73.9186	443.143	77.2435	217.68
73.9186	276.8	77.2435	181.4
72.2386	211.68	77.2435	138.576
75.6786	151.2	80.7545	153.655
75.6786	119.959	80.7545	169.02
77.5244	115.96	104.323	130.015
77.5244	119.959	119.778	365.1
77.5244	124.243	118.992	208.8
75.6786	108.713	141.657	256.32
75.6786	89.1692	135.218	256.32
77.5244	91.5158	156.568	189
77.5244	91.5158	198.32	245.333
77.5244	91.5158	198.32	200.727
73.9439	91.5158	205.886	192.071
66.2414	91.5158	136.64	130.608
64.8896	91.5158	146.4	155.486
66.2414	91.5158	181.412	110.245
66.2414	91.5158	161.76	98.9455
66.2414	91.5158	220.286	102.037
63.5918	91.5474	311.4	112.593
66.2414	85.5512	334.8	125.585
66.2414	87.69	2138.4	119.214
68.2456	94.8	434.2	98.7771
68.2456	103.129	238.971	95.7081
65.4021	125.229	223.04	98.3667
66.7936	183.692	299.2	90.9789
67.6508	141.757	299.2	88.5
69.1215	120.91	269.28	90.7692
69.1215	109.575	299.2	90.8
70.6575	92.2737	384.686	88.5
72.2634	87.66	384.686	88.5
72.2634	92.2737	342.6	86.3415
72.2634	103.129	220.8	86.3415
72.2634	100.183	220.8	86.3415
73.9439	103.094	1308	86.3415
75.7045	103.094	872	90.7692
77.5509	100.149	872	88.5
77.5509	103.094	654	84.2857
79.4897	113.071	654	84.3143
85.9348	116.84	872	84.3143
93.5173	121.629	654	84.3143
73.8933	117.434	654	84.3143
73.8933	136.224	872.4	84.3143
75.6526	162.171	451.2	88.53
75.6526	115.96	298.92	88.53
75.6526	112.219	252	86.3707
75.6526	119.959	192.706	90.8
73.8933	124.243	136.5	98.3667
73.9186	112.994	117	98.3667
73.9186	114.514	101.52	101.177
75.6786	127.296	96.0324	152.236
73.9186	163.768	82.6326	171.853
75.6786	141.436	80.7545	176.274
75.6786	122.314	80.7545	115.48
77.5244	148.904	80.7545	133.968
77.5244	148.171	78.96	119.614
77.5244	144.743	78.96	111.755
75.6786	167.7	78.96	241.457
77.5244	186.267	78.96	612
77.5244	186.267	78.96	183.086
75.7045	186.267	77.2435	213.6
73.9439	197.224	77.2435	427.2
67.6508	267.1	77.2435	245.333
66.2414	318.3	77.2435	200.486
64.8896	363.771	78.96	181.4
66.2414	569.4	80.7545	130.608
67.6508	1137	80.7545	204.075
66.2414	775.5	111.517	153.709
63.5918	775.5	129.36	112.72
64.8896	387.75	134.75	109.084
64.8896	310.2	129.36	102.473
64.0673	167.116	118.992	119.214
68.2456	144.95	141.657	115.24
65.4021	128.844	156.568	93.1895
65.4021	128.844	165.267	90.8
66.2414	124.243	198.32	90.8
69.1215	124.243	198.32	90.7692
69.1215	108.713	146.4	88.5
69.1215	89.1692	146.4	88.5
70.6575	89.1692	252.8	88.5
73.9439	89.1692	171.333	86.3415
73.9439	89.1692	171.333	86.3415
73.9439	91.5158	256.2	86.3415
73.9439	91.5158	83.7	86.3415
73.9439	91.5158	712.8	86.3415
77.5509	91.5158	325.65	86.3415
77.5509	91.5158	325.65	86.3415
77.5509	91.5474	269.28	86.3415
79.4897	91.5474	244.8	86.3415
85.9348	81.5721	325.65	84.2857
72.2139	85.5512	325.65	84.2857
72.2139	87.69	336.6	84.3143
72.2139	113.11	384.686	84.3143
73.8933	166.971	521.04	84.3143
73.8933	323.7	276	84.3143
72.2139	298.5	87.03	86.3707
67.6276	141.757	94.0865	88.53
67.6276	113.11	220.8	86.3707
69.0978	92.2737	484.4	90.8
69.0978	85.522	681.6	99.0171
69.0978	92.2737	188.8	98.3667
72.2386	100.183	872	98.3667
73.9186	103.129	1308	110.662
77.5244	103.094	2616	132
75.6786	103.094	872	128.815
75.6786	100.149	872	104.662
77.5244	100.149	872	104.982
75.6786	109.537	872	101.143
75.7045	116.84	872	133.246
72.2634	113.52	902.4	163.26
67.6508	113.52	373.65	140.85
64.8896	130.985	223.2	308.743
62.3449	126.133	156	427.2
64.8896	99.3943	142.435	854.4
66.2414	102.318	121.333	752.4
67.6508	112.219	104.506	231.273
67.6508	108.713	96.0324	175.425
66.2414	96.6333	86.6634	140.9
62.3449	106.08	82.6326	125.585
61.1669	117.822	82.6326	141.965
61.1669	106.04	80.7545	155.4
62.3662	100.729	80.7545	113.96
63.6135	103.782	78.96	94.6378
63.6135	122.314	78.96	98.9829
64.9118	136.992	78.96	135.264
67.674	142.7	78.96	132.969
67.674	155.727	78.96	93.4378
69.1215	180.316	77.2435	90.7692
69.1215	171.3	77.2435	88.5
72.2634	214.125	77.2435	90.7692
70.6575	279.4	77.2435	88.5
70.6575	321.2	78.96	86.3415
72.2634	345.9	78.96	86.3415
72.2634	395.314	80.7545	84.2857
77.5509	395.314	87.03	84.2857
77.5509	91.5158	89.2615	84.2857
77.5509	1551	101.062	86.3415
79.4897	517	104.323	84.2857
70.6091	517	107.8	84.2857
70.6091	344.667	104.323	84.2857
70.6091	264.6	95.9613	84.2857
72.2139	167.116	106.243	84.2857
72.2139	151.252	118.992	84.2857
69.0741	151.252	129.339	84.2857
69.0978	151.252	141.657	82.3256
69.0978	151.252	198.32	82.3535
69.0978	128.844	157.662	82.3535
69.0978	99.3943	170.8	82.3535
67.6276	89.1692	195.72	88.53
69.0978	89.1692	157.662	86.3707
72.2386	91.5158	192.75	88.53
75.6786	89.1692	199.029	88.53
75.6786	91.5158	311.4	108.3
75.6786	91.5158	368.4	110.662
73.9186	91.5158	372.171	107.309
75.6786	91.5158	289.467	104.153
70.6575	91.5474	224.4	114.232
72.2634	91.5474	325.65	124.044
66.2414	91.5474	651.3	101.491
62.3449	91.5474	521.04	104.982
63.5918	81.6	651.3	104.982
63.5918	83.5143	276	115.48
66.2414	83.5143	276	136.05
67.6508	94.8	220.8	153.726
69.1215	166.26	484.4	175.5
66.2414	301.886	484.4	185.4
61.1669	527.2	539.04	284.8
61.1669	256.6	484.4	433.2
61.1669	116.88	220.8	225.44
62.3662	92.2737	220.8	150.313
61.1669	85.522	220.8	115.24
61.1669	92.2737	902.4	111.755
62.3662	109.575	541.44	150.313
66.2641	162.114	541.44	107.273
69.1452	121.586	654	86.3415
67.674	103.094	654	90.7692
69.1452	100.149	451.2	106.109
70.6817	97.3667	298.92	128.311
70.6817	103.094	204.75	122.1
70.6575	97.3029	156	110.284
70.6575	100.165	131.04	95.6757
70.6575	106.425	122.871	84.2857
73.9439	106.425	104.506	86.3415
77.5509	99.3943	98.7	84.2857
79.4897	91.5474	88.83	84.2857
79.4897	86.97	82.6326	84.2857
69.0741	91.5474	82.6326	84.2857
69.0741	94.0541	82.6326	84.2857
70.6091	96.6667	80.7545	84.2857
69.0741	96.6667	80.7545	84.2857
70.6091	102.353	78.96	84.2857
69.0978	99.4286	78.96	84.2857
67.6276	90.9257	78.96	84.2857
67.6276	92.5946	78.96	82.3256
67.6276	95.1667	77.2435	82.3256
67.6276	118.097	77.2435	84.2857
64.8673	131.723	77.2435	88.5
66.2187	122.357	78.96	86.3707
67.6276	131.769	78.96	82.3535
70.6333	142.75	78.96	82.3535
73.9186	190.333	82.6326	88.53
72.2386	259.3	84.6	90.8
70.6333	444.514	82.8857	88.53
70.6333	397.8	89.2615	88.53
70.6575	353.6	91.6105	95.7081
69.1215	353.6	91.7838	101.682
63.5918	1591.2	94.3333	98.3667
61.1459	89.2	94.3333	95.7081
63.5918	3102	91.7838	98.3667
64.8896	3102	96.7	101.177
64.8896	3102	98	100.941
66.2641	1551	101.062	124.044
67.674	1034	117.145	176.274
64.9118	387.75	140.609	189.36
60.0128	387.75	174.988	188.308
61.1669	238.615	228.831	140.85
61.1459	198.45	174.988	153.655
61.1459	173.94	165.267	256.32
61.1459	158.127	128.1	233.018
61.1669	165.657	146.4	266.585
63.6135	165.657	204.96	241.543
62.3662	158.76	227.733	172.86
67.674	128.844	110.4	126.622
66.2641	93.9892	868.4	111.755
67.674	89.1692	289.467	140.064
67.674	89.1692	325.65	128.044
69.1452	91.5158	651.3	95.6757
70.6817	91.5158	138	88.5
70.6817	91.5158	138	84.2857
72.2881	91.5158	138	84.2857
70.6817	91.5158	276	92.1474
72.2634	91.5158	220.8	106.109
75.7045	91.5474	220.8	106.109
79.4897	91.5158	484.4	88.5
69.0741	91.5474	539.04	88.5
69.0741	89.2	539.04	84.2857
69.0741	86.97	484.4	84.2857
67.6276	81.6	681.6	84.2857
69.0978	85.5805	681	84.2857
67.6276	89.9385	1362	84.2857
66.2187	109.612	484.4	84.3143
66.2187	268.5	676.8	84.2857
66.2187	322.2	386.743	84.2857
66.2187	679.2	338.4	84.2857
64.8673	240.8	451.2	82.3256
66.2187	208.582	654	82.3256
66.2187	113.11	451.2	82.3256
66.2187	89.9077	332.133	82.3256
67.6276	87.66	199.425	84.2857
67.6276	97.4	148.909	86.3415
67.6276	126.089	136.5	84.3143
70.6575	171.6	121.286	84.3143
69.0978	117.393	103.2	88.53
64.8896	109.537	93.5053	88.53
63.5918	97.3667	88.83	88.53
61.1459	94.7351	84.6	90.8
61.1459	92.2421	82.6326	93.1895
64.8896	91.5474	82.6326	93.1895
66.2414	94.6	82.6326	98.3667
66.2414	94.6	80.7545	95.7081
64.8896	97.3029	78.96	104.153
66.2414	94.0216	78.96	107.309
59.9922	91.5474	78.96	99.0171
61.1459	89.2	78.96	118.345
62.3449	91.5789	78.96	167.46
62.3449	94.0541	77.2435	157.8
62.3449	94.0541	77.2435	171.853
59.9922	96.6667	77.2435	115.48
62.3449	96.6667	78.96	136.154
63.5918	96.6667	84.6	306
66.2414	94.0541	84.6	272
66.2641	87	84.6	284.8
67.674	87	82.8857	140.9
66.2641	94.0541	91.6105	150.313
67.674	110.516	94.3333	123.471
67.674	118.138	91.6105	109.425
69.1452	126.889	87.03	120.745
70.6817	131.769	91.6105	110.625
70.6817	176.8	89.2615	95.6757
70.6817	289.309	94.0865	95.6757
72.2881	553.44	95.1176	82.3256
75.7304	636.48	98	80.4545
115.462	353.6	109.587	82.3256
115.423	397.8	134.75	87.54
124.302	1060.8	202.125	89.7846
140.515	220.8	205.886	92.1474
187.745	220.8	141.55	86.3415
481.657	3102	162.316	84.2857
1444.97	3102	165.267	84.3143
107.765	775.5	165.267	84.3143
69.0741	387.75	170.8	86.3707
69.0978	282	278.64	84.3143
67.6276	258.5	110.4	84.3143
67.6276	204.635	220.8	84.3143
66.2187	183.095	521.04	84.3143
66.2187	158.127	372.171	84.3143
64.8673	158.127	651.3	82.3535
64.8673	158.127	138	82.3256
66.2187	151.252	138	82.3256
64.8673	158.76	138	83.3714
63.57	158.76	90	87.54
64.8673	122.044	90	93.1579
64.8673	99.36	90	86.3707
64.8673	91.5158	155.4	88.53
64.8673	91.5158	539.04	88.53
67.6276	91.5158	539.04	88.53
69.0741	89.1692	539.04	90.8
69.0978	91.5158	363.3	90.8
67.6276	91.5158	484.4	93.1895
63.57	91.5158	484.4	95.7081
63.57	91.5474	726.6	95.7081
61.125	91.5474	484.4	101.177
61.125	91.5474	451.2	114.232
59.9922	86.97	300.8	115.52
62.3449	86.94	300.8	99.0171
62.3449	86.94	338.4	104
63.5918	87.72	386.743	114.4
63.5918	87.69	451.2	118.345
62.3449	89.9385	314.04	128.815
62.3449	109.819	179.533	133.246
62.3449	247.846	161.58	225.36
62.3449	263.6	124.292	235.5
62.3449	280.32	101.52	322.457
59.9922	361.2	98.7	427.2
61.1459	422.64	93.5053	123.471
62.3449	136.8	88.83	101.143
62.3449	97.4	86.6634	95.6757
66.2414	92.2737	86.6634	114.194
64.8896	113.48	82.6326	107.273
67.6508	153.96	82.6326	101.143
67.674	137.829	80.7818	95.6757
67.674	126.089	78.9867	84.2857
69.1452	103.164	78.9867	80.4545
69.1452	97.3667	78.9867	84.2857
69.1452	92.2421	78.9867	88.5
70.6817	89.2	78.96	86.3415
70.6817	89.2	77.2435	87.54
81.5558	92.0432	77.2435	84.2857
96.7669	94.6	78.96	84.3143
92.3698	94.0216	78.96	84.3143
89.804	91.5474	80.7545	84.3143
92.3698	91.5789	84.6	84.3143
92.3698	91.5789	82.6326	84.3143
100.995	94.0541	84.6	84.3143
115.462	94.0541	79.1182	84.3143
160.976	94.0541	84.9	84.3143
361.243	94.0541	91.7838	84.3143
1444.97	89.2308	89.2615	84.3143
93.6454	89.2308	87.03	82.3535
72.2386	87	87.03	82.3535
69.0978	84.878	94.3333	85.4049
69.0978	84.878	99.8824	84.2857
67.6276	82.8571	107.8	86.3415
64.8673	89.2308	113.7	84.2857
64.8673	91.5789	107.8	86.3707
63.57	97.92	124.385	88.53
63.57	132.6	170.211	88.53
66.2187	176.8	224.4	88.53
63.57	289.309	147	90.8
62.3235	636.48	147	90.8
63.57	454.629	134.087	93.1895
63.57	454.629	140.182	95.7081
63.5482	454.629	198.32	101.177
64.8451	636.48	214.338	114.232
66.196	1060.8	266.914	122.571
72.2139	220.8	220.8	98.3667
72.2386	220.8	276	96.2333
67.6276	1590.6	276	107.25
66.2187	1590.6	276	104.982
63.57	157.2	276	110.71
62.3449	1551	90	144.35
61.1459	1034	90	204.075
61.1459	620.4	90	235.5
61.1459	387.75	90	349.714
62.3449	261.969	90	489.6
63.5918	227.04	484.4	107.273
62.3449	183.095	539.04	84.2857
61.1459	183.095	539.04	86.3415
61.1459	151.252	539.28	126.429
62.3449	151.252	363.3	122.069
62.3449	133.8	726.6	107.273
61.1459	128.844	726.6	95.6757
59.9922	139.152	484.4	84.2857
58.8813	167.116	386.743	84.2857
59.9922	144.327	300.8	87.54
59.9922	135.3	270.72	94.6378
62.3449	124.892	270.72	86.3415
63.5918	102.282	270.72	87.54
64.8896	96.6	300.8	88.53
67.6508	91.5158	279.84	84.3143
67.6508	89.1692	190.094	84.3143
69.1452	91.5158	161.58	84.3143
67.674	91.5158	115.414	84.3143
67.674	91.5474	96.0324	84.3143
67.674	91.5474	91.1077	84.3143
69.1452	89.2	92.3368	84.3143
88.3521	86.94	92.3368	84.3143
79.5169	86.94	87.72	84.3143
82.896	86.94	86.6634	84.3143
78.8523	86.94	84.6286	84.3143
80.8236	89.9692	82.6605	86.3707
82.896	89.9692	80.7818	87.54
85.0775	89.9385	78.9867	87.54
85.0775	87.69	78.9867	82.3256
87.3769	113.148	78.9867	82.3256
92.3698	201.375	78.9867	86.3415
100.6	358	78.96	88.5
131.707	322.2	77.2435	88.5
208.827	467.2	77.2435	88.5
481.657	240.8	77.2435	88.53
73.9186	316.56	78.96	90.8
70.6333	162.114	80.7545	90.8
67.6276	146.1	84.6	95.7081
66.2187	149.788	84.6	104.153
64.8673	115.745	82.6326	114.232
66.2187	109.819	76.6435	120.311
66.2187	96.6	77.36	107.309
66.2187	91.5158	80.9581	118.345
63.57	87.63	84.9	127.111
62.3235	89.1692	82.8857	118.345
63.57	86.94	82.8857	122.571
63.57	89.1692	89.2615	167.46
63.5482	91.5158	89.3684	167.46
63.5482	96.6	104.55	150.626
66.196	91.5789	136.591	171.812
69.0978	91.5789	157.08	349.714
72.2386	91.5474	157.08	114.194
69.0978	91.5789	149.6	84.2857
67.6276	91.5789	161.7	86.3415
64.8673	89.2308	174.533	107.273
61.1459	91.5789	151.6	90.7692
61.1459	87	154	95.6757
62.3449	87	134.75	95.6757
62.3449	87	146.857	82.3256
61.1459	87	198.32	82.3256
62.3449	84.878	157.662	82.3256
61.1459	84.878	145.8	87.54
61.1459	87	110.4	88.53
59.9922	84.878	138	84.3143
59.9922	82.8571	276	86.3707
61.1459	96.6667	276	84.3143
61.1459	102.697	276	84.3143
58.8813	132.6	90	84.3143
56.7784	167.495	90	84.3143
58.9014	227.314	90	84.3143
59.9922	265.2	202.2	84.3143
62.3449	289.309	202.2	84.3143
62.3449	318.24	314.4	84.3143
62.3449	353.6	90	82.3535
64.8896	636.48	898.4	86.3707
66.2414	376.2	673.8	86.3707
67.6508	1060.4	539.28	88.53
67.6508	795.3	539.28	88.53
67.6508	636.24	726.6	89.7846
67.674	795.3	726.6	85.4049
69.1452	555	484.4	86.3415
83.702	370	371.4	87.54
77.5775	370	311.018	88.8308
76.9749	370	285.1	88.5
76.9749	157.2	270.72	88.5
78.8523	775.5	270.72	90.7692
78.8523	620.4	246.109	90.8
80.8236	443.143	154.02	95.7081
80.8236	310.2	140.504	98.3667
82.896	243.257	146.891	107.309
82.896	200.329	107.72	114.232
88.3824	183.095	97.4667	110.662
97.4565	165.657	92.3368	101.177
115.903	158.127	89.9692	104.153
127.311	158.127	89.9692	110.71
254.621	128.844	86.6927	122.571
481.657	115.96	86.6927	122.571
96.3841	119.959	84.6286	145.617
72.2386	128.844	82.6605	152.236
70.6333	138.052	80.7818	152.236
70.6333	226.714	78.9867	176.274
67.6276	144.273	78.9867	306
69.0978	96.6	78.9867	107.273
67.6276	96.6	78.9867	110.625
67.6276	91.5158	78.9867	95.6757
66.2187	91.5158	77.2696	90.7692
63.57	94.0216	77.2435	92.1474
63.57	91.5474	77.2435	93.1579
63.5482	91.5474	77.2435	86.3415
63.5482	91.5158	80.7545	80.4545
64.8451	86.94	82.6326	78.6667
64.8451	86.94	82.6326	83.3714
67.6045	86.94	82.6326	90.8
72.2386	86.94	76.6435	84.3143
69.0978	86.94	76.6435	86.3707
64.8673	89.9385	77.36	90.8
66.2187	97.4333	82.8293	88.53
63.57	103.165	84.9	88.53
59.9717	97.4333	82.8571	88.53
61.1459	116.92	84.9	84.3143
61.1459	247.846	89.3684	84.3143
61.1459	322.2	119.486	82.3535
59.9922	352.2	149.6	82.3535
59.9922	467.2	184.8	84.3143
59.9922	395.7	209.44	84.3143
58.9014	527.6	157.08	84.3143
57.8305	249.943	140.609	88.53
57.8305	212.2	134.75	90.8
58.9014	167.018	119.778	92.1474
60.0128	140.139	140.609	94.6378
57.8305	100.129	147	87.54
56.7978	89.2	154	87.54
56.7978	83.4286	174.988	89.7846
60.0128	84.8195	174.988	92.1474
58.9014	86.94	146.4	94.6378
60.0128	86.94	186.327	95.6757
62.3449	89.1692	149.6	95.6757
63.5918	91.5158	138	104.153
66.2414	93.9892	276	104.727
67.6508	91.5474	276	114.232
66.2414	84.8488	276	115.2
67.6508	89.2	276	104.153
67.6508	91.5474	276	101.177
69.1215	89.2308	276	101.177
79.5169	87	138	111.794
75.7304	87	90	122.571
75.7304	87	90	124.044
77.5775	87	202.2	133.968
75.1847	87	202.2	133.968
76.9749	87	202.2	144.35
76.9749	87	314.4	176.274
75.1847	84.878	90	253.8
75.1847	87	90	95.6757
76.9749	84.878	1348.2	90.7692
80.8236	80.9302	898.8	87.54
82.896	82.8571	726.6	98.5059
83.7307	89.2308	726.6	171.916
93.5813	125.6	726.6	170.94
102.094	132.6	363.3	101.143
126.911	138.365	451.2	82.3256
190.966	159.12	285.1	80.4818
254.621	318.24	285.1	90.8
722.485	318.24	270.72	86.3707
72.2386	289.309	246.109	84.3143
70.6333	353.6	186.56	86.3707
70.6333	454.629	118.477	95.7081
72.2386	397.65	115.414	88.53
70.6333	318.12	124.292	88.53
69.0978	353.467	107.72	86.3707
69.0978	272.492	92.3368	86.3707
69.0978	795.3	92.3368	84.3143
64.8673	2259.6	89.9692	82.3535
63.5482	89.1692	89.9692	82.3535
63.5482	370	86.6927	82.3535
63.5482	492.3	86.6927	80.4818
66.196	370	82.6605	80.4818
67.6045	370	80.7818	82.3535
64.8451	1034	80.7818	93.1895
70.6333	1110	78.9867	88.53
66.2187	370	78.9867	90.8
63.57	775.5	78.9867	95.6914
63.57	775.5	78.9867	89.7846
62.3235	387.75	78.9867	86.3415
59.9717	310.2	77.2696	92.1474
58.8813	200.329	77.2696	100.046
59.9922	193.267	77.2435	94.6378
59.9922	165.657	77.2435	93.1579
58.8813	151.252	78.96	106.109
58.9014	151.252	82.6326	111.484
60.0128	133.8	82.6326	107.309
58.9014	115.96	82.6326	111.484
58.9014	115.96	76.6435	110.662
58.9014	108.713	76.6435	110.662
57.8305	115.96	77.36	104.153
56.7978	112.181	82.8571	108.3
56.7978	139.104	82.8571	176.274
56.7978	115.92	82.8571	205.65
57.8305	102.282	82.8571	145.617
57.8305	99.36	82.8293	152.236
57.8305	96.6	99.8824	243
57.8305	96.6	125.664	236.7
62.3662	94.0216	149.6	94.2
63.6135	96.6333	209.44	111.965
64.8896	93.9892	142.8	108.039
64.8896	93.9892	124.385	113.421
66.2414	91.5158	134.75	273.055
66.2414	89.1692	124.385	378.72
67.6508	89.1692	140.609	134.677
72.2634	86.94	179.667	87.54
75.7304	89.1692	244.892	90.8
73.9692	89.1692	172.024	95.7081
72.2881	91.5158	156.568	86.3707
72.2881	92.3053	174.988	86.3707
75.7304	97.4333	154.8	90.8
75.7304	103.164	129.2	93.1895
73.9692	109.612	149.6	90.8
73.476	159.436	55.2	86.3707
71.8432	268.5	92	86.3707
73.476	322.2	138	86.3707
75.1847	467.2	92	86.3707
78.8523	435.6	69	84.3143
81.5837	386.64	69	82.3535
83.7307	352.4	92	82.3535
85.9937	291.6	90	82.3535
95.5071	183.72	90	80.4818
113.104	174.442	202.2	82.3535
144.316	117.393	202.2	90.8
208.827	103.127	202.2	93.1895
305.763	86.94	202.2	90.8
722.485	84.8195	314.4	101.894
667.496	84.8195	91.2	89.7846
73.9186	84.8195	91.2	86.3415
73.9186	86.94	91.2	90.7692
73.9186	86.94	726.6	100.046
72.2386	89.1692	726.6	96.2333
72.2386	91.5158	363.3	90.7692
73.9186	86.97	318.343	95.6757
70.6333	86.97	278.55	95.6757
67.6045	86.97	300.8	107.309
64.8451	89.2	193.371	104.727
62.3022	86.97	164.612	123.429
63.5482	87	123.216	133.55
63.5482	87	114.089	110.662
62.3022	87	107.72	104.153
62.3022	87	107.72	152.236
66.2187	87	104.245	167.46
67.6276	87	91.7838	145.617
64.8673	87	89.9692	145.617
64.8673	87	89.9692	265.091
63.57	87	89.9692	249.6
63.57	87	86.6927	437.04
61.125	87	86.6927	117.785
59.9922	82.8571	82.6605	108.039
57.8107	84.878	80.7818	171.467
56.7978	99.7412	80.7818	543.6
57.8305	122.446	78.9867	222.545
60.0128	138.365	78.9867	107.215
60.0128	144.655	78.9867	101.177
58.9014	176.8	78.9867	93.1895
57.8305	176.8	78.9867	86.3707
58.9014	187.2	78.9867	86.3707
57.8305	227.314	77.2696	95.7081
56.7978	454.629	77.2696	95.7081
58.9014	318.12	77.2696	93.1895
57.8305	265.1	78.96	88.53
55.8013	272.492	82.6326	86.3707
56.7978	272.492	82.6326	86.3707
56.7978	322.036	82.6326	84.3143
57.8305	1240.2	82.6326	82.3535
61.1669	1129.8	76.6174	82.3535
63.6135	92.0108	76.6174	82.3535
62.3662	92.0108	76.6174	84.3143
62.3662	656.4	82.8571	84.3143
62.3449	492.3	82.8571	88.53
66.2414	620.64	82.8571	90.8
67.6508	480.72	82.8571	104.153
77.5509	517	82.8571	98.3667
77.5775	387.75	84.9	104.153
75.7304	443.143	91.7838	94.6378
72.2881	620.4	125.778	86.3415
70.6817	775.5	149.6	89.7846
69.1452	775.5	130.9	102.988
69.1452	387.75	111.517	104.662
70.6817	258.5	119.778	95.6757
70.6817	200.329	167.558	93.1579
72.2881	183.095	224.4	88.5
73.9946	139.152	243	95.6757
71.8432	133.8	171.15	104.727
71.8432	119.959	205.886	128
72.3129	119.959	165.267	138.24
77.604	115.96	141.657	114.232
79.5441	108.713	148.74	122.11
81.5837	108.675	154.8	139.55
81.5837	99.36	163.906	139.55
89.7188	105.382	110.743	133.968
95.061	108.675	129.2	152.236
113.104	105.382	118.05	197.012
125.296	108.675	139.333	197.012
218.247	105.382	139.333	115.49
382.204	99.36	185.6	104.662
722.485	105.382	101.8	119.614
1444.97	153.943	90	159.486
73.9186	126.24	90	164.7
75.6786	138.821	202.2	175.68
73.9186	138.261	202.2	146.4
73.9186	99.36	202.2	108.31
72.2386	91.5158	202.2	90.8
72.2386	91.5158	314.4	93.1895
72.2139	91.5158	91.2	95.7081
67.6045	91.5158	91.2	104.153
63.5482	91.5158	484.4	98.3667
62.3022	91.5158	726.6	93.1895
62.3022	91.5158	363.3	90.8
62.3022	100.129	207.6	86.3707
62.3022	100.129	278.55	82.3535
62.3022	97.2686	246	82.3535
66.2187	103.164	169.86	80.4818
63.57	129.911	133.2	82.3535
63.57	292.909	123.216	82.3535
63.57	322.2	114.089	82.3535
63.57	292.909	110.014	86.3707
62.3235	483.3	111.434	93.1895
59.9717	280.32	111.434	90.8
58.8611	350.4	94.3333	104.153
59.9922	448.4	89.9692	95.7081
57.8305	238.629	92.3368	95.7081
57.8305	231.6	87.72	101.177
57.8305	198.514	86.6927	90.8
57.8305	128.88	84.6286	88.5
58.9014	94.5333	82.6605	97.2667
56.7978	86.94	80.7818	100.941
56.7978	84.8195	80.7818	90.7692
58.9014	84.8195	78.9867	88.5
56.7978	84.8195	77.2696	88.5
57.8305	84.8195	77.2696	90.7692
58.9014	86.94	78.9867	104.118
57.8305	86.94	78.9867	101.647
56.7978	86.94	78.9867	108
61.1669	86.94	77.2696	115.2
61.1669	86.97	77.2696	125.1
61.1669	89.2	77.2435	123.771
60.0128	89.2	78.96	145.617
60.0128	86.97	80.7545	139.55
57.8305	86.97	82.6326	152.236
61.1669	87	82.6326	176.274
61.1669	87	82.6326	197.012
64.9118	87	76.6174	2185.2
73.9946	87	76.6174	104.662
69.1452	87	76.6174	115.49
69.1452	87	80.9581	152.236
70.6817	87	82.8857	176.274
72.2881	87	82.8857	164.7
70.6817	87	82.8857	146.4
69.1452	84.878	82.8571	115.779
70.6817	80.9302	80.8571	101.718
70.6817	80.9302	84.9	113.64
70.6817	84.878	91.7838	140.34
70.6817	89.2421	94.3333	134.629
73.9946	105.938	95.1176	111.523
72.3129	122.4	107.8	101.682
72.3129	138.365	119.778	104.153
72.3129	132.6	209.44	86.3707
75.7563	187.2	182.25	82.3256
75.7563	227.314	290.4	82.3256
81.5837	244.8	268.5	80.4545
88.3824	272.492	112.154	80.4818
90.9076	253.029	103.36	80.4818
92.5225	272.492	148.74	80.4818
100.053	295.2	165.267	84.3143
117.257	393.6	146.653	86.3707
208.827	444.686	139.32	84.3143
218.402	496.08	132.686	93.1895
361.243	620.1	87.9158	88.53
1444.97	691.2	86.1333	95.7081
121.58	434.4	83.6	93.1895
101.97	656.4	104.4	93.1895
100.598	480.72	128.492	90.8
104.622	517	65.3143	97.2667
107.885	387.75	202.8	100.941
118.501	344.667	202.8	86.3415
113.563	310.2	202.8	86.3415
110.775	340.92	202.2	84.2857
110.775	387.75	202.2	86.3415
109.003	775.5	202.2	93.1579
95.7902	775.5	202.2	97.2667
92.9728	310.2	91.2	98.3667
90.3165	221.571	353.4	117.848
85.4345	179.242	484.4	117.848
87.8077	183.095	363.3	109.463
90.3165	133.8	290.64	112.994
82.3208	115.96	242.2	115.49
82.3208	115.96	206.625	124.044
82.3208	115.96	147.704	145.617
73.9186	108.713	132.415	176.274
73.9186	105.382	130.662	217.6
73.9186	99.36	111.393	185.012
72.2386	91.5158	111.393	157.26
70.6333	91.5158	111.393	209.25
69.0741	89.1692	111.393	210.08
66.196	93.9892	106.125	196.941
66.196	93.9892	94.3333	186
62.3022	89.1692	91.7838	254.4
63.5482	89.1692	92.3368	111.443
62.3022	99.36	87.72	111.443
61.125	251.8	86.6927	128.16
61.125	540	88.86	119.945
62.3235	1203.6	82.6605	90.8432
63.57	360	80.7818	80.5116
63.57	105.382	80.7818	77.1391
64.8673	93.9892	78.96	111.64
63.57	93.9892	78.9867	115.49
63.5405	91.5158	77.2696	166.611
62.3186	91.5158	77.2696	188.229
60.0105	89.1692	78.9867	219.6
60.0128	89.1692	78.9867	122.509
56.7978	93.9892	78.9867	104.925
56.7978	97.2686	78.9867	117.244
56.7978	102.318	77.2435	121.754
54.8393	99.3943	77.2435	202.708
56.7978	102.318	80.7545	200.727
56.7978	112.219	82.6326	142.8
55.8013	183.133	82.6326	119.214
56.7978	247.846	82.6326	108.037
57.8305	402.75	82.6326	90.9789
58.9014	308.4	76.6174	82.3256
60.0128	253.467	76.6174	82.3143
58.9014	201.375	76.6174	80.4545
58.9014	149.836	76.6174	80.4545
58.9014	150.126	79.1182	80.4818
60.0128	138.943	84.9073	80.4818
60.0128	171.067	84.9073	80.4818
60.0128	128.88	82.8857	84.3143
57.8305	86.94	80.9581	86.3707
57.8305	84.8195	82.8857	86.3707
58.9014	84.8195	84.93	86.3707
58.9014	84.8195	82.8293	86.3707
57.8305	84.8195	89.3684	86.3707
62.3662	84.8195	89.3684	84.3143
66.2641	84.8195	101.062	84.3143
66.2641	86.94	124.385	95.3333
66.2641	86.94	224.4	98.0571
70.6817	86.94	208.286	88.8615
72.2881	86.97	276	87.54
69.1452	86.97	342.6	84.2857
69.1452	86.97	121.5	84.2857
70.6817	86.97	110.743	92.1474
70.6817	86.97	141.657	89.7846
70.6817	87	129.339	94.6378
72.3129	87	129.339	136.704
73.9946	87	127.333	113.92
73.9946	87	132.231	117.848
72.3129	87	143.25	112.994
77.604	87	156.273	100.08
77.604	87	97.6	109.463
77.604	87	180.947	131.616
81.5837	87	128.492	129.733
85.9937	87	76.2	129.733
85.9937	80.9302	92	129.733
96.4171	80.9302	276	143
98.3389	82.8571	276	174.733
117.257	99.7412	202.8	165.537
148.526	102.764	202.8	233.3
240.102	102.658	202.8	231.273
311.737	106.335	202.2	192.64
722.485	106.335	202.2	192.343
124.498	132.6	202.2	231.273
64.934	151.543	202.2	364.2
124.498	126.514	706.8	1676.4
124.498	141.696	484.4	106.8
123.887	208.376	484.4	78.8533
115.206	272.492	363.3	76.3909
115.206	295.2	205.2	74.6933
101.97	393.6	180.4	116.509
92.9728	389.1	147.704	111.443
87.8077	311.28	122.957	106.8
85.4345	311.28	122.957	106.8
83.1862	496.08	119.644	106.8
85.4345	2259.6	119.644	122.1
87.8077	434.4	119.644	101.048
82.3208	480.72	107.68	96.1667
85.1762	517	99.8824	82.4286
82.8741	387.75	91.7838	82.4286
79.0541	310.2	91.7838	78.6818
73.9186	344.667	87.0769	78.6818
73.9186	340.92	87.72	76.3909
72.2386	378.8	86.6927	77.113
67.6045	1034	86.6927	75.4723
67.6045	620.4	82.6605	73.9
66.196	310.2	80.7818	73.9
66.196	193.875	80.7545	75.4723
64.8451	172.333	78.96	73.9
63.5482	183.095	78.96	75.4723
62.3235	128.844	78.96	82.493
61.125	115.96	78.96	98.5333
61.125	112.219	78.9867	160.24
63.57	112.181	78.9867	111.64
62.3235	105.382	78.9867	108.039
61.125	105.382	78.9867	141.965
62.3235	96.6	77.2435	186.212
63.57	89.1692	78.96	172.145
62.3235	89.1692	80.7545	157.714
62.3235	89.1692	82.6326	124.643
62.3235	89.1692	82.6326	181.714
59.9717	89.1692	82.6326	157.714
58.9014	86.94	82.6326	220.8
57.8305	89.1692	76.6174	280.68
55.8013	96.6	76.6174	217.68
54.8393	285.709	76.6174	155.486
54.8393	288.655	76.6174	125.244
55.8013	105.382	80.9581	117.89
56.7978	91.5158	82.8857	86.3415
58.9014	91.5158	89.2615	82.3256
57.8305	91.5158	84.9073	80.4545
55.8013	91.5158	80.9581	80.4545
55.8013	91.5158	80.9581	82.3256
57.8305	91.5158	80.9581	82.3535
56.7978	91.5158	82.9143	80.4818
58.9014	96.6333	84.9073	80.4818
58.9014	99.3943	89.3684	84.3143
60.0128	91.5474	111.517	82.3535
62.3662	96.6333	174.533	82.3535
61.1669	105.418	314.16	86.3707
62.3662	137.35	456.8	84.3143
61.1669	230.143	419.4	84.3143
62.3662	283.6	195.771	88.53
62.3662	432.4	110.743	90.8
63.6135	211.44	174.988	86.64
64.9118	140.087	129.339	82.3535
64.934	102.282	127.333	87.54
66.2868	122.044	122.786	87.54
64.934	137.3	114.6	89.7846
69.1688	112.142	118.552	110.71
70.6817	99.36	122.786	106.8
67.674	86.94	118.552	106.8
67.674	84.8195	143.25	148.591
67.674	84.8195	87.9158	131.446
67.674	84.8195	96.9	97.3
69.1452	84.8195	125.4	89.8154
70.6817	84.8195	55.2	97.3
72.3129	84.8195	69	100.08
73.9946	86.94	276	103.024
73.9946	86.94	276	112.994
77.604	86.94	202.8	100.08
75.7563	86.97	202.8	103.024
73.9946	86.97	202.8	120.786
75.7563	86.97	202.8	209.68
79.5441	86.97	202.8	241.938
79.5441	86.97	202.8	245.7
83.7307	87	912	222.277
95.5071	87	256.5	288.96
114.697	87	193.286	424
106.09	87	146.836	619.2
135.425	87	126	619.2
142.948	87	129.216	619.2
247.18	87	124.246	97.8
312.333	87	119.644	52.8
1444.97	87	129.216	37.2
82.04	87	111.393	116.509
63.6353	84.878	94.3333	94.9333
137.603	80.9302	88.2769	94.9333
130.722	89.2308	88.2769	94.9333
130.722	96.8571	84.9	104.657
125.271	99.9273	85.5805	102.29
115.249	94.2171	84.6	91.0909
115.249	96.9529	82.6326	86.55
98.7836	96.9529	80.7545	84.439
90.3165	122.4	78.96	80.5116
85.4345	138.365	80.7545	82.4286
83.1862	110.7	78.96	84.439
85.4345	118.08	78.96	84.439
87.8077	177.12	78.96	80.5116
85.4345	253.029	78.96	77.113
85.4639	236.16	78.96	75.4723
85.4639	192.282	82.6326	73.9
79.0541	217.92	82.6326	72.3918
79.0541	217.92	82.6326	75.4723
81.0812	204.3	80.7273	73.9
83.2149	345.867	80.7273	80.6182
70.6575	431.6	80.7273	80.6182
70.6575	592.2	82.6047	86.5171
67.6276	1110	82.6326	136.431
64.8673	480.72	80.7545	143.52
64.8673	517	78.9333	192.267
64.8673	387.75	76.6174	126.686
64.8673	387.75	76.6174	154.226
64.8673	387.75	76.6174	116.614
63.57	387.75	79.1182	116.614
61.125	387.75	82.8857	141.965
62.3235	517	89.2615	131.236
63.57	443.143	84.9073	157
64.8673	387.75	79.1182	195.692
62.3235	282	79.1182	195.692
63.57	206.8	77.36	276
62.3235	176.4	79.1182	594.6
62.3235	131.808	80.9581	408.15
62.3235	119.959	84.9	155.486
61.125	108.675	89.3684	120.933
58.9014	105.382	116.356	134.677
57.8107	105.382	209.44	136.752
56.7784	105.382	339.333	85.4049
58.8813	99.36	138	80.4545
57.8107	89.1692	274.08	80.4545
57.8107	89.1692	132.545	82.3256
60.0128	89.1692	104.143	82.3256
62.3662	89.1692	148.74	80.4545
61.1878	89.1692	129.339	80.4818
60.0333	89.1692	127.333	80.4818
55.8205	93.9892	118.552	80.4818
56.7978	93.9892	107.438	82.3535
56.7978	358.133	104.182	82.3535
58.9014	2160	104.182	80.4818
60.0128	317.52	107.438	82.3535
60.0128	102.282	118.552	82.3535
61.1669	91.5158	128.5	82.3535
60.0128	91.5158	92.8	86.3707
60.0128	91.5158	92.8	86.3707
60.0128	89.1692	103.36	84.3143
61.1669	89.1692	82.2857	86.3707
60.0128	89.1692	127.2	87.54
62.3662	89.1692	91.44	98.0571
63.6135	89.1692	276	133.968
61.1669	91.5474	315.6	103.564
60.0333	91.5474	154.8	102.988
62.3876	89.2	135.2	136.704
64.934	89.1692	202.8	106.8
66.2868	93.9892	202.8	89.8154
66.2868	108.675	615.6	85.4341
67.6971	115.92	307.8	87.57
66.2868	139.104	307.8	89.8154
67.6971	477.6	55.2	103.024
66.2641	318.4	1824	103.024
64.9118	134.084	608	100.08
66.2641	99.36	261.6	103.024
66.2641	86.94	190.024	106.145
67.674	93.9568	179.467	167.34
69.1452	91.4842	153.829	185.012
69.1688	89.1692	134.6	196.575
73.9946	86.94	170.021	196.575
75.7563	84.8195	146.836	363.429
75.7563	84.8195	99.8824	424
73.9946	84.8195	91.7838	181.2
75.7563	82.8	88.2769	928.8
77.604	82.8	88.2769	132.3
73.9946	82.8	83.9707	266.215
79.5441	84.8195	82.6326	1153.6
81.5837	86.94	82.6326	142.255
95.5071	86.94	82.6326	104.32
119.684	86.97	82.6326	102.554
119.053	86.97	78.96	98.7556
122.527	86.97	78.96	109.277
122.527	86.97	78.96	109.277
158.902	86.97	78.96	104.657
267.714	87	78.96	96.1667
447.538	87	78.96	82.4286
137.603	87	80.7545	78.6818
137.603	87	80.7545	78.6818
137.603	87	82.6326	80.5116
144.061	87	82.6326	82.4286
130.965	87	82.6047	80.5116
131.666	87	80.7273	78.6818
117.037	87	80.7273	80.5116
112.857	87	80.7273	78.8267
95.7902	87	80.7273	75.4723
87.8077	84.878	78.9333	75.4723
85.4345	84.878	77.2174	75.4723
83.1862	84.75	76.6174	77.113
85.4345	82.6829	76.6174	75.4723
85.4345	77.0455	80.9581	77.113
83.2149	78.8372	80.9581	73.9
83.2149	84.72	82.8857	73.9
81.0812	113.669	87.03	73.9
81.0812	132.6	82.8857	73.9
79.0541	113.657	82.8857	75.4723
79.0541	126.514	79.1182	77.113
79.0541	196.8	79.1182	78.8267
81.0812	161.018	77.36	150.47
81.0812	154.017	80.9581	173.04
69.1215	136.246	84.93	266.215
70.6333	130.752	84.93	554.4
66.2187	136.2	89.4	141.029
63.57	163.44	125.664	120.933
63.57	181.6	184.8	149.333
64.8673	204.3	114.554	237.84
64.8673	326.76	195.771	206.229
64.8673	473.76	124.1	670.8
63.57	789.6	224.4	131.492
62.3235	918.6	196.35	106.109
62.3235	1551.6	134.75	104.625
63.57	1110	118.992	116.72
63.57	517.2	114.6	87.54
64.8673	517	110.903	82.3256
62.3022	443.143	107.438	82.3256
62.3022	443.143	104.182	82.3256
62.3022	387.75	104.182	80.4545
63.57	387.75	104.182	80.4545
62.3235	387.75	107.438	80.4545
59.9922	310.2	115.543	80.4818
57.8107	344.667	123.36	80.4818
56.7784	443.143	105.382	82.3535
57.8107	310.2	96.9	84.3143
58.8813	167.116	103.36	80.4818
57.8305	144.327	114	80.4818
58.9014	109.84	114.3	80.4818
62.3662	112.181	276	80.4818
61.1669	108.675	276	84.3143
61.1878	102.282	276	84.3143
60.0333	96.6	69.6	84.3143
61.1878	96.6	615.6	86.3707
58.9216	93.9892	157.8	90.8
60.0333	89.1692	205.2	111.794
60.0333	89.1692	153.9	118.345
58.9216	89.1692	105.2	100.046
60.0333	89.1692	205.2	102.988
60.0128	89.1692	340.5	109.463
61.1669	91.5474	272.4	97.3
60.0128	94.0216	340.5	87.57
60.0128	94.0216	92.4	83.4
60.0128	173.94	1824	87.57
64.9118	226.8	784.8	97.3
62.3662	105.382	523.2	103.024
60.0128	93.9892	403.8	112.994
63.6353	89.1692	461.486	109.463
64.934	89.1692	323.04	112.994
70.7059	89.1692	201.9	116.76
72.3129	89.1692	140.452	122.057
70.7059	89.1692	95.0118	152.127
69.1688	89.1692	91.7838	233.3
69.1688	89.1692	88.2769	233.3
67.6971	86.94	86.07	508.8
67.6971	89.2	82.6605	928.8
63.6353	89.2	82.6326	1092.6
64.9118	89.2	82.6326	156.48
64.9118	89.1692	82.6326	111.771
67.674	89.1692	82.6326	122.057
69.1452	91.5158	80.7545	106.656
70.7059	91.5158	78.96	101.048
73.9946	99.36	78.96	108.533
73.9946	664.8	78.96	103.655
73.9946	201.48	78.96	93.5676
72.3129	96.6	80.7545	86.55
72.3129	84.8195	80.7545	82.4286
73.9946	89.1385	78.96	78.6818
73.9946	89.1692	77.2435	80.5116
79.5441	89.1692	77.2435	82.4286
83.7307	84.8195	78.9333	80.5116
89.7188	84.8195	78.9333	78.6818
101.851	84.8195	77.2174	80.5116
108.701	82.8	77.2174	78.8267
122.527	82.8	77.2174	75.4723
114.661	82.8	75.5745	72.3918
123.59	82.8	77.2174	72.3918
202.238	84.8195	77.2174	75.4723
298.359	86.94	74.9872	75.4723
1444.97	86.94	80.1	75.4723
137.603	86.94	80.9581	73.9
144.061	86.97	80.9581	75.4723
137.201	86.97	80.9581	73.9
143.636	86.97	82.8857	72.3918
121.538	86.97	80.9581	72.3918
109.003	87	80.9581	72.3918
101.97	87	79.1182	72.3918
85.4345	87	79.1182	84.4571
85.4345	87	79.1182	115.36
85.4345	87	80.8857	150.47
85.4345	87	89.4	650.1
83.1862	87	87.1077	141.965
83.1862	87	87.1077	204.075
81.0812	87	107.36	450.343
79.0541	87	125.664	358.8
79.0541	87	136.591	231.6
77.126	84.878	157.08	2420.4
77.126	82.8571	157.08	298.8
77.126	82.8571	92.7529	136.752
77.126	80.7143	157.08	102.988
77.126	80.9581	134.75	89.7846
77.126	79.1182	109.2	106.109
81.0812	86.8923	89.2308	102.988
69.1215	113.669	87	89.7846
69.0978	122.4	84.878	94.6378
66.2187	109.738	96.6667	89.7846
64.8673	106.08	98.2286	82.3256
63.57	132.6	98.2286	82.3256
64.8673	122.152	101.118	80.4545
63.57	118.08	107.438	80.4818
63.57	114.271	118.552	80.4818
66.2187	112.717	129.408	80.4818
66.2187	121.067	106.4	80.4818
64.8673	142.122	112.659	80.4818
64.8673	163.44	114	80.4818
63.57	181.6	91.44	80.4818
64.8673	204.225	276	78.6933
63.5482	258.84	276	82.3535
61.104	235.309	138	82.3535
61.104	326.76	276	86.3707
62.3022	1034.4	69.6	86.3707
61.104	1034.4	139.2	111.794
58.8813	517.2	139.2	114.4
58.8813	517.2	219.6	101.929
57.8107	517.2	307.8	100.046
60.0128	517	166.5	94.6378
60.0128	517	406.457	110.245
56.7978	517	111	94.9333
57.8305	517	117.8	85.4341
60.0128	387.75	290.64	83.4
62.3662	344.667	214.629	92.1789
62.3662	420.686	275.52	103.024
61.1878	483.6	300.667	97.3
61.1878	258.5	272.64	106.145
62.3876	132.3	340.8	112.994
60.0333	117.686	340.8	129.733
58.9216	109.84	277.2	131.446
61.1878	108.675	2137.2	113.92
57.8503	99.36	1524.6	176.147
57.8503	96.6	523.2	219.6
57.8503	96.6	201.9	219.6
58.9014	96.6	170.021	439.2
57.8305	93.9892	100.95	225
57.8305	91.5158	94.3333	312.96
60.0128	91.5158	89.3684	260.8
67.674	91.5158	86.07	135.086
63.6135	91.5158	82.6326	106.8
64.9118	91.5474	82.6326	111.443
64.934	91.5474	82.6326	133.2
67.6971	91.5474	82.6326	107.357
69.1688	94.0216	82.6326	101.824
70.7059	94.0216	82.6326	88.7692
70.7059	91.5474	78.96	84.439
67.6971	89.1692	78.96	80.5116
67.6971	86.94	78.96	76.9333
67.6971	86.94	80.7545	78.6818
64.934	86.94	80.7545	76.9333
64.934	89.1692	78.96	78.6818
64.9118	89.1692	77.2435	77.113
66.2641	89.1692	77.2435	75.4723
69.1452	89.1692	77.2435	75.4723
70.7059	89.1692	78.9333	72.3918
70.7059	89.1692	78.9333	73.9
69.1688	89.2	78.9333	73.9
70.7059	89.2	77.2174	73.9
72.3129	89.1692	75.5745	73.9
70.7059	89.1692	75.5745	73.9
72.3129	86.94	75.5745	77.113
73.9946	89.1692	77.2174	75.4723
77.604	89.1692	78.32	73.9
79.5169	96.6	76.6174	73.9
85.9642	153.533	76.6435	72.3918
93.5493	664.8	73.45	72.3918
105.623	184.24	77.36	72.3918
107.257	93.9892	87.03	72.3918
122.579	86.91	82.8857	90.9538
123.59	86.91	80.9581	285.2
171.125	86.94	80.9581	918.8
223.769	86.94	80.9581	671.4
659.51	84.8195	79.1182	102.988
1444.97	82.8	79.1182	87.54
137.603	82.8	79.1182	124
85.2453	82.8	87.1077	148.418
137.603	82.8	89.4	181.4
144.007	82.8	91.8162	192.071
144.061	84.8195	89.4	162.8
131.666	84.8195	98.0364	100.046
112.857	86.94	101.1	97.2667
105.369	86.94	102.375	87.54
101.97	86.94	109.2	96.7412
92.9728	86.97	131.04	137.05
87.8077	86.97	126	125.057
85.4345	86.97	124.385	112.955
83.1862	86.97	99.2727	97.2667
83.1862	87	91.5789	92.1474
83.1862	87	87	87.54
81.0812	87	89.2308	89.7846
79.0541	87	89.2308	82.3256
77.126	87	95.5	80.4545
77.126	87	98.2286	80.4818
77.126	87	98.2286	80.4818
79.0541	87	110.903	80.4818
79.0541	87	132.231	80.4818
77.126	87	128.5	80.4818
77.126	84.878	154.2	82.3535
77.126	84.878	112.659	80.4818
79.0814	82.8571	104.5	82.3535
81.1091	80.9302	134.914	84.3143
83.2435	80.9302	55.2	86.3707
67.6276	80.9581	276	86.3707
64.8673	80.9581	138	104.153
64.8673	86.8923	276	101.177
63.57	91.5667	276	93.1895
64.8673	96.9529	500.8	90.8
63.57	109.738	69.6	86.3707
63.57	102.658	1050.6	88.56
63.57	98.4	135	89.8154
64.8673	101.211	90	89.9368
64.8673	107.345	166.5	89.8154
63.57	105.445	406.457	97.3
63.5918	108.96	355.65	103.024
66.196	108.96	320.667	92.1789
66.196	116.743	181.65	92.1789
63.5482	131.856	214.629	100.08
61.104	137.35	250.473	129.733
61.104	181.533	196.8	125.1
60.3921	258.84	209.7	103.024
58.8813	369.771	261.6	126.578
58.8813	287.6	373.714	349.95
61.1669	287.6	436	294.84
60.0128	585.3	272.64	543.6
60.0128	517.2	272.64	219.6
60.0128	344.8	138.6	546.3
58.9014	620.64	1524.6	928.8
61.1669	443.314	1524.6	337.5
61.1669	387.9	435.6	312.96
61.1669	443.143	248.492	312.96
61.1669	517	201.9	81.4154
62.3876	775.5	104.206	98.55
60.0333	517	94.3333	101.492
58.9216	443.143	89.3684	136.636
60.0333	310.2	86.04	133.154
61.1878	387.75	86.6634	104.909
58.9216	258.5	82.6326	91.1053
57.8503	141	82.6326	84.439
57.8503	117.686	82.6326	78.6818
58.9216	117.686	82.6326	77.113
58.9216	112.181	80.7545	77.113
58.9216	105.382	78.96	77.113
60.0128	96.6	78.96	77.113
63.6135	96.6	78.96	75.4723
62.3662	96.6	80.7545	75.4723
62.3876	93.9892	78.96	73.9
64.934	93.9892	77.2435	73.9
63.6353	91.5158	77.2435	73.9
66.2868	91.5158	77.2435	73.9
64.934	91.5158	77.2174	73.9
63.6353	91.5158	78.9333	73.9
63.6353	91.5474	78.9333	73.9
63.6353	91.5474	77.2174	73.9
66.2868	91.5474	77.2174	72.3918
63.6353	94.0216	74.725	72.3918
64.934	91.5474	71.736	75.4723
63.6353	91.5474	74.725	72.3918
63.6135	89.1692	75.5745	72.3918
64.9118	86.94	78.1636	72.3918
70.7059	86.94	76.6435	72.3918
70.7059	86.94	75.0128	73.9
69.1688	86.94	75.0128	114.08
69.1688	89.1692	75.0128	279.4
67.6971	89.1692	80.9581	162.8
70.7059	89.1692	80.9581	87.54
75.7563	89.1692	80.9581	97.2667
75.7563	89.1692	80.9581	136.752
75.7304	89.2	80.9581	141.965
77.5775	89.2	79.1182	117.89
79.5169	89.1692	79.1182	92.1474
85.9642	89.1692	84.9073	100.046
96.3841	86.94	84.9846	94.6378
113.056	89.1692	92.0667	85.4049
130.015	89.1692	98.0364	89.7846
128.654	96.6	91.6421	106.103
171.125	115.92	94.1189	109.425
247.316	125.422	94.1189	102.988
494.633	108.675	92.7158	89.7846
544.45	91.5158	93.6	92.1474
130.722	86.91	96.3529	89.7846
144.061	86.91	126	85.4049
130.965	86.94	130.9	82.3256
112.857	84.8195	105.677	80.4545
101.935	82.8	91.5789	80.4818
92.9728	82.8	87	80.4818
90.3165	82.8	94.0541	84.3143
90.3165	82.8	102.353	82.3535
83.1862	82.8	92.9189	84.3143
83.1862	82.8	95.5	82.3535
83.1862	84.8195	98.2286	84.3143
83.1862	86.94	107.84	86.3707
81.0532	86.94	115.543	86.3707
81.0812	86.94	124.431	86.3707
79.0541	86.94	134.8	86.3707
79.0541	86.97	161.76	95.7081
77.126	86.97	110.743	93.1895
77.126	86.97	140.945	93.1895
77.126	86.97	127.2	86.3707
79.0541	87	92	86.3707
79.0814	87	276	84.3143
77.1525	87	276	94.6703
77.1525	87	276	112.552
79.0814	87	500.8	103.564
81.1091	87	119.6	100.08
81.1091	84.878	69.6	100.08
79.0814	84.878	89.7	92.1789
67.6276	87	150.96	89.8154
66.2187	87	166.5	97.3
64.8673	84.878	238.8	112.994
62.3235	84.878	474.2	112.994
62.3235	80.9302	355.65	100.08
62.3235	80.9302	207.6	106.145
63.57	80.9581	242.2	262.5
63.57	80.9581	199.714	384.686
63.57	82.8571	169.8	407.7
63.5918	80.9302	161.714	333.429
63.5918	86.8923	169.8	336.6
63.5918	89.1789	236.143	928.8
67.6508	94.1829	236.143	450
64.8451	102.658	254.308	259.867
62.3022	86.7474	214.4	259.867
61.104	90.8308	174.4	72.96
62.3022	91.5667	218	112.629
61.5762	96.1412	237.818	104.557
61.1459	102.15	762.3	114.73
60.0128	108.96	609.84	128.222
62.3662	130.752	387.45	96.1667
61.1669	131.856	215.36	88.7692
57.8305	181.6	119.644	82.4286
58.9014	192.212	100.95	77.113
61.1669	215.7	89.3684	77.113
61.1669	323.55	83.9415	77.113
61.1669	258.84	86.04	77.113
60.0128	258.84	86.6634	77.113
60.0128	585.3	82.6326	73.9
61.1878	343.92	82.6326	73.9
60.0333	343.92	82.6326	73.9
61.1878	344.8	82.6326	73.9
61.1878	387.9	80.7545	73.9
61.1878	387.75	78.96	73.9
57.8503	517	78.96	73.9
57.8503	517	78.96	73.9
57.8503	517	80.7545	73.9
58.9216	387.75	78.96	73.9
58.9216	282	77.2435	72.3918
60.0333	310.2	77.2435	72.3918
62.3876	140.087	77.2435	73.9
63.6135	122.044	77.2174	73.9
61.1669	117.686	77.2174	73.9
62.3876	117.686	77.2174	72.3918
63.6353	105.382	77.2174	72.3918
62.3876	99.36	76.3149	72.3918
64.934	96.6	73.2	75.2348
64.934	96.6	73.2	97.7829
63.6353	93.9892	74.725	257.908
63.6353	93.9892	75.5745	396.4
63.6353	93.9892	74.7913	326.52
64.934	91.5158	76.4533	217.68
61.1878	91.5158	76.6435	100.046
62.3876	91.5474	75.0128	89.7846
63.6353	91.5474	73.45	89.7846
63.6135	91.5474	75.0128	94.6378
64.9118	91.5474	76.6435	92.1474
67.6971	91.5474	77.36	102.988
69.1688	89.2	79.1182	140.661
69.1688	89.2	80.9581	140.064
69.1688	89.1692	80.9581	112.955
67.6971	86.94	79.1182	129.689
72.3129	86.94	80.9581	125.057
70.4708	86.94	87.2211	92.1474
73.674	86.94	89.5784	85.4049
73.6492	86.94	92.0667	82.3256
77.1563	86.94	92.0667	82.3256
77.1563	89.1692	99.4971	82.3256
75.7304	89.1692	108.825	84.3143
83.702	89.1692	94.1189	84.3143
92.8676	89.2	95.2216	80.4818
118.195	89.2	90.7135	80.4818
118.146	89.2	90.7135	86.3707
171.125	89.1692	109.2	84.3143
329.755	89.1692	105.677	84.3143
395.706	86.94	96.3529	86.3707
722.485	84.8195	88.3263	88.53
1444.97	91.5158	91.5474	93.1895
130.722	93.9892	98.7176	95.7081
130.722	91.5158	101.062	95.7081
130.965	96.6	95.5	95.7081
115.249	89.1692	95.5	86.3707
106.712	86.94	95.5	86.3707
92.9728	86.91	95.1529	88.53
92.9728	86.91	95.1529	98.4
90.3165	86.94	95.1529	100.976
87.8077	84.8195	115.543	92.1789
87.8077	82.8	140.661	94.6703
83.1862	82.8	104.4	100.08
83.1862	82.8	119.314	94.6703
83.1862	82.8	132.545	97.3
83.1862	82.8	134.914	100.08
83.2149	84.8195	127.2	103.024
79.0541	84.8195	152.64	109.463
79.0541	86.94	152.4	100.08
77.126	86.94	733.5	100.08
77.126	86.94	119.6	200.325
79.0541	86.94	69.6	848
77.1525	86.94	213.8	619.2
79.0814	86.94	238.8	389
79.0814	86.97	474.2	619.2
79.0814	87.03	474.2	181.2
79.0814	87.03	474.2	421.8
79.0814	87.03	360.75	281.2
79.0814	87	242.2	260.8
77.1525	87	228	130.4
77.1525	87	194.8	130.4
79.0814	87	134.862	80.3
62.3235	84.878	134.862	133.6
61.125	84.878	137.664	104.28
[truncated: 9,333 more rows]
