# Supplementary material for: Circuit mechanisms underlying embryonic retinal waves
Source: eLife. 2023 Feb 15;12:e81983. doi: 10.7554/eLife.81983 (PMC9988258; doi:10.7554/eLife.81983)
Supplement: Figure 2—source data 1. [file elife-81983-fig2-data1.xlsx]

## Sheet: Sheet1
Event frequency per field of view per condition (Figure 2A-D)												Event area and amplitude per field of view per condition (Figure 2E-H)
ctrl	mfa		ctrl	hex		ctrl	EPB		ctrl	DHBE		mean event area			mean event area
0.997753	0		0.873034	0.374157		0.748315	0		1.37191	0.748315		ctrl	mfa		ctrl	DHBE
0.623596	0		0.498876	0.374157		1.12247	0		0.873034	0.62422		86.9006	21.7128		96.6503	58.6601
0.498876	0.124719		0.374157	0		0.623596	0		0.873034	0.998752		64.1621	4.75779		93.4641	5.22876
1.62135	0.249438		0.498876	0		1.74607	0.124719		0.999429	0.249857		82.6973	73.0624		64.7059	14.5425
1.24719	0.374157		0.623596	0		0.873034	0		0.8745	0		89.9306	15.9722		92.7469	35.2273
0.863333	0.246667		0.312676	0					0.624643	0.499714		72.7623	13.4259		90.2778	7.91667
0.493333	0.123333		0.187606	0								52.3438	13.4259		81.4484	8.33333
0.986667	0.37		0.12507	0								69.9653	NaN
			0.12507	0								28.3333	NaN		mean event amplitude
			0.187606	0											5.88862	2.33279
			0.997753	1.6								mean event amplitude			1.88346	0.864056
			1.24719	0								1.85895	1.5849		1.28483	0.941739
			1.184	0								2.11154	1.00323		1.48888	0.991771
												3.04307	2.96819		0.753787	0.456661
												1.05366	0.708512		0.73255	0.463369
												1.47065	0.995778
												1.0874	0.811886
												1.11478	NaN
												0.805425	NaN
