# Supplementary material for: Circuit mechanisms underlying embryonic retinal waves
Source: eLife. 2023 Feb 15;12:e81983. doi: 10.7554/eLife.81983 (PMC9988258; doi:10.7554/eLife.81983)
Supplement: Figure 3—source data 1. [file elife-81983-fig3-data1.xlsx]

## Sheet: Sheet1
Inter-transient-interval and wave area in β2-KO per retina per condition (Figure 3D & E)																																				Wave Speed in WT and β2-KO per field of view (Figure 3C)
β2-KO Ctrl												β2-KO Hex												β2-KO MFA													Wave Speed
Inter-transient-interval						Wave Area						Inter-transient-interval						Wave Area						Inter-transient-interval						Wave Area							β2-KO Ctrl	WT Ctrl
Retina 1	Retina 2	Retina 3	Retina 4	Retina 5		Retina 1	Retina 2	Retina 3	Retina 4	Retina 5		Retina 1	Retina 2	Retina 3	Retina 4	Retina 5		Retina 1	Retina 2	Retina 3	Retina 4	Retina 5		Retina 1	Retina 2	Retina 3	Retina 4	Retina 5		Retina 1	Retina 2	Retina 3	Retina 4	Retina 5			174.166	77.9056
170	42.9198	80.6476	59.0361	137.349		5.60112	3.36779	41.6798	22.8223	15.9555		329.375	67.4107	96.1665	392.369	221.084		31.4605	16.8283	5.47589	21.9434	29.1478		70	517.857	118.072	184.337	112.048		0.863724	0.213151	0.00787898	0.244141	0.440152			183.944	92.4025
190.833	47.9692	80.6476	60.241	137.349		19.9529	8.07844	21.2654	4.17969	41.8878		204.25	71.9048	96.1665	392.369	369.88		3.89984	17.212	20.1623	21.8164	22.8023		142.5	517.857	95.9839	101.205	462.651		0.436224	0.213151	0.00787898	0.263672	0.537963			192.19	98.1861
108.295	53.7415	80.6476	59.0361	39.759		18.2254	2.24875	42.838	9.89258	29.9425		189.5	86.8056	130.465	151.138	279.518		18.2691	8.90973	47.3684	43.9844	30.4683		142.5	367.857	71.6867		428.916		0.663061	0.458276	0.00787898	0.107422	0.085585			162.261	117.338
104.091	82.8869	86.0241	59.0361	138.554		8.09632	9.00565	11.8973	3.29102	16.738		236.875	900	182.651	151.138	365.06		20.677	4.98774	4.43587	35.4102	17.3615		142.5	367.857	302.41		21.6867		0.663061	0.511563	0.0236369	0.0390625	0.0978115			189.837	128.524
96.5909	204.167	96.1075	59.0361	74.0964		21.9333	4.16711	37.4803	16.3477	17.3004		296.667	71.9048	293.574	136.024	365.06		7.31984	7.54556	6.95714	7.02148	16.5913		142.5	245.238	307.229		225.904		0.148316	0.181179	0.015758	0.15625	0.586869			237.337	87.9721
121.071	220.238	96.1075	59.0361	74.0964		21.8199	3.12267	43.4447	9.05273	27.8151		189.5	71.9048	293.574	134.27	279.518		23.5125	3.63423	7.71352	12.4805	22.3988		142.5	151.19	89.1566		225.904		0.200663	0.831291	0.00787898	0.0683594	0.256755			179.243	92.4041
151.786	613.095	96.1075	687.349	138.554		12.066	8.54737	20.9581	4.36523			135.357	67.4107	220.181	221.988	279.518		3.05357	13.3113	19.075	27.9492	22.0687		142.5	301.19	89.1566		21.6867		0.122143	0.106576	0.0866688	0.0390625	0.146717			165.681	92.0644
118.056	42.9198	86.1044	229.116	138.554		22.9454	7.50293	16.4513	22.2363			236.875	56.8296	81.1863	136.024	182.53		7.58157	15.6879	11.4718	8.45703	18.6575		142.5	517.857	89.1566		21.6867			0.138548	0.0866688	0.214844	1.03925			144.522	103.246
169.5	54.4643	86.0241	229.116	138.554		11.7519	4.09251	8.02868	9.22852			78.4615	65.1042	105.542	136.024	182.53		9.27412	9.73036	9.73054	34.6582	18.6942		142.5	356.548	234.94		428.916			0.362357	0.00787898	0.0976562	0.085585			182.066	103.899
149.062	51.8707	86.0241	274.94	138.554		10.3821	6.39454	18.0271	7.74414			72.8571	69.4444	96.1665	136.024	279.518		22.7709	5.2009	20.1465	33.2129	19.171		142.5	735.714			465.06			0.362357	0.00787898	0.166016	0.134491			135.984	134.163
119.25	40.9226	104.116	299.598	138.554		8.94259	6.45849	24.0072	16.1133			81.875	65.1042	293.976	136.024	279.518		16.5852	9.73036	20.4696	36.416	30.4805		142.5	367.857			465.06			0.117233	0.0236369		0.146717			164.142	146.108
127.361	53.7594	75.9745	224.699	148.193		13.3048	7.99318	29.0656	4.05273			946.25	80.1282	87.9518	86.747	279.518		3.08847	6.07482	7.30381	17.9688	26.8003		142.5	245.238			225.301			0.298412	0.00787898		0.501284			177.775	203.601
208.125	68.1746	75.9745	229.116	73.494		10.0942	3.93264	17.2786	10.6445			315.833	206.746	75.3873	134.27	168.434		10.3385	7.034	5.49165	38.0371	29.7958		211.875	183.929			187.651			0.511563	0.00787898		0.110038			197.15	88.4732
78.75	68.1746	71.7537	229.116	146.988		14.9974	4.59341	9.52569	16.6016			92.8409	129.762	81.1863	136.024	121.687		11.7868	16.0823	16.3016	10.1074	14.6839		142.5	245.238			180.321			0.767345	0.015758		0.183397			163.521	124.182
360.625	57.9132	92.2547	231.627	148.193		16.4805	4.295	7.65837	9.11133			78.5577	150	160.643	151.138	120.482		10.6177	7.07663	10.5184	17.5391	26.1034		142.5	466.667			225.301			0.78866			0.146717			192.592	156.771
91.6346	133.333	99.2586	231.627	49.3976		22.0293	3.46371	24.8897	8.10547			72.9464	180	117.537	123.658	121.687		4.88571	12.2775	6.81532	27.9297	30.7862		142.5	311.111			243.373			1.77981			0.0978115			156.152	135.679
84.5833	462.5	80.6476	419.88	49.3976		15.992	6.06416	21.6357	4.41406			78.5577	450	96.1665	113.353	93.1727		7.66009	11.0945	7.46927	19.873	17.4349		142.5	136.111			486.747			0.39433			0.158944			199.893	185.069
79.2969	75	80.6476	231.627	148.193		13.5666	16.1675	9.39962	30.5371			78.5577	309.524	96.1665	120.263	450.602		25.301	3.83673	2.33218	8.21289	27.1182		76.25	163.333			450.602			0.575509			1.10038			186.146	197.531
79.2969	62.5	80.6476	231.627	138.554		9.78887	21.88	21.5411	28.7109			81.9792	206.349	99.6386	1010.84	562.651		17.8067	3.34648	16.7192	27.4707	18.4252		142.5	245.238			450.602			0.447618						179.771	101.518
74.6324	120.238	86.0241	274.94	138.554		24.5507	18.1818	8.6196	8.87695			75.6731	126.058	130.465	92.7711	339.157		9.03856	12.2775	6.90986	22.5488	21.4941		266.25	736.905			450.602			0.277097						181.436	158.468
74.7059	154.592	99.2586	231.627	138.554		6.76147	14.8993	7.09108	8.48633			72.9464	82.967	182.651	294.578	115.663		13.5229	7.23649	12.5039	7.31445	20.2714		180.625	408.333			365.06			0.607482						202.219	121.812
74.7059	221.429	104.116	231.627	138.554		6.09841	15.4641	16.6168	19.8145			75.6731	180	293.574	92.7711	279.518		15.1021	7.50293	13.4415	10.8398	16.4323		211.875	136.111			36.1446			0.596824						136.184	140.141
76.4844	613.095	92.1687	419.88	138.554		6.61316	10.1993	5.67286	18.8184			113.472	126.058	220.181	86.747	280.723		8.15739	6.97005	18.8229	18.7305	15.4542		211.875	136.111			36.1446			0.341042						178.137	224.968
79.4531	338.095	113.582	419.88	138.554		25.6064	20.1215	13.5124	9.10156			236.875	148.81	293.574	86.747	140.361		11.2633	2.55782	14.5525	11.7285	21.6652		247.5	361.905			486.747			1.52403						166.462	172.278
84.75	169.048	156.175	419.88	138.554		15.7215	16.4979	7.51655	8.52539			231.25	83.0586	137.694	151.054	120.31		6.99703	13.1408	5.70438	32.6074	29.588		247.5	257.143			486.747			0.266439						239.406	165.437
143.281	133.532	236.145	231.627	138.554		9.1607	3.99659	19.4453	19.2969			233.333	77.1259	124.247	147.992	120.31		10.8184	15.1444	5.65711	5.36133	20.0758		142.5	115.476			36.1446			0.458276						277.753	177.694
286.562	45.3042	99.3513	231.627	138.554		30.2216	26.612	7.41412	17.0703			108.75	77.0408	141.997	177.59	120.482		21.9682	11.361	17.4283	21.6602	13.6202		76.25	736.905			36.1446			0.170521						212.892	135.555
97.7885	93.75	99.3513	231.928	146.988		25.4406	23.3934	13.087	5.88867			72.8571	63.5154	124.398	123.658	120.482		14.5437	7.01268	12.9767	7.72461	22.6189		142.5	272.222			486.747			0.255782						302.353	174.333
85.1786	126.786	92.2547	472.289	146.988		14.5612	5.3501	15.758	6.28906			72.8571	49.0801	117.537	113.353	345.181		7.11918	3.21859	7.28806	3.7793	22.4233		142.5	163.333			486.747			0.298412						241.741	138.949
79.375	56.7766	92.2547	472.289	73.494		19.0019	7.33241	8.99779	6.81641			72.8571	53.9881	117.537	120.263	172.59		5.26959	5.87232		27.3242	7.78824		142.5	183.929			486.747			0.479591
80.2083	45.3042	92.1687	250	73.494		17.9288	6.6823	7.67413	55.6738			98.25	65.1042	117.537	1010.84	133.936		17.7979	6.08547		39.7266	18.0584		142.5	257.143			486.747			0.287754
205	48.0392	92.1687	267.229	73.494			2.77097	32.5323	4.0918			503.75	65.1042	110.71	392.771	138.072			18.0859		15.1465	23.4625		266.25	115.476			486.747			0.415645
228.75	57.3308	86.0241	289.558	73.494			10.7961	12.5433	9.49219			189.25	108.929	124.548	392.771	339.157			5.2755		21.8164	9.18205		180.625	115.476			485.542			0.298412
74.6324	38.9031	80.6476	1680.72	73.494			22.2104	13.9931	9.63867			102	397.619	124.548	92.7711	115.663			6.19205		26.416	32.2656		180.625	115.476			486.747			0.170521
74.6324	37.5616	86.0241	472.289	48.996			14.6009	17.6095	9.92188			92.7273	180	124.548	92.7711	345.181			14.5369		26.416	23.108		211.875	784.524			486.747			0.650112
79.2969	43.5714	86.0241	472.289	48.996			10.6789	5.6965	28.7402			72.8571	150	160.643	87.0482	200.904			7.43899		16.2207	18.3641		211.875	514.286			486.747			0.468933
70.4861	53.8221	92.1687	289.558	146.988			6.98071	17.4441	35.6543			68.0833	90	176.145	87.0482	168.434			4.79591		22.5781	36.6182		248.75	283.333			486.747			0.479591
70.5556	68.1746	107.53	263.373	137.349			26.4095	7.06744	38.5254			68.0833	112.5	293.574	221.988	140.361			4.26303		31.9238	31.0307		142.5	115.476			486.747			0.415645
70.4861	73.5931	107.53	174.431	137.349			14.6648	8.13111	4.43359			68.0833	180	313.253	220.482	140.361			13.0342		33.5352	27.4117		142.5	115.476			485.542			0.30907
66.8421	115.625	117.306	267.229	137.349			15.4322	17.5859	28.4473			68.0833	309.524	137.694	146.988	210.542			13.0768		29.4824	33.0847		142.5	90.4762			485.542			1.00181
74.7059	308.333	156.175	1680.72	137.349			14.9845		4.58984			68.0833	138.095	266.265	120.263	120.31			8.41948		29.9707			142.5	115.476			486.747			0.564851
74.7059	462.5	208.233	592.369	138.554			11.9685		9.51172			72.9464	185	66.1898	139.759	120.482			8.48343		50.1562			142.5	115.476			36.1446			0.341042
74.7059	240.476	249.88	1680.72	138.554			12.075		5.80078			72.9464	98.9286	58.8353	579.518	140.562			5.59523		6.65039			142.5	147.024			486.747			0.78866
74.7059	93.75	107.631	1680.72	137.349			16.5086		44.6875			72.9464	425.595	58.8353	579.518	172.59			11.2224		23.3789			181.25	690.476			486.747			0.181179
74.7059	62.5	117.415	1680.72	138.554			6.85282		11.4746			72.9464	261.111	88.1526	689.157	133.936			2.48321		21.6113			181.25	647.619			486.747			0.809975
74.7794	83.5034	67.9138	483.133	138.554			12.48		21.8066			72.9464	450.595	105.783	689.157	135.663			10.9347		22.0215			180.625	647.619			486.747			0.905894
79.4531	106.385	67.9138	483.133	138.554			28.6049		5.26367			72.8571	901.19	117.537	689.157	368.675			1.98231		22.5195			211.875	647.619			485.542			0.223809
74.7794	120.238	75.9036	389.759	138.554			8.18502		38.1641			72.8571	134.97	124.548	689.157	240.964			5.76575		7.37305			211.875	294.048			485.542			0.287754
84.75	119.048	92.1687	269.076	146.988			16.1356					72.8571	98.1602	124.548	1010.84	345.181			3.50634		24.0527			120.417	275.595			486.747			0.181179
119.25	165.873	92.1687	255.422	146.988			22.1571					78.4615	67.4851	124.548	505.422	200.904			5.23287		56.3281			181.25	79.7619			486.747			0.234467
108.409	79.8942	92.1687	130.823	146.988			11.9152					72.8571	51.4172	124.548	505.422	267.871			12.3734		28.7012			266.25	79.7619			496.386			0.3517
84.75	168.651	92.1687	130.823	146.988			3.2399					72.8571	46.9462	150.843	252.711	160.723			11.6168		35.1855			266.25	79.7619			486.747			0.298412
84.75	74.026	92.1687	592.369	73.494			9.11222					72.8571	49.0801	251.406	259.036	140.361			3.11201		12.6074			180.625	79.7619			486.747			0.266439
79.4531	60.5655	99.2586	592.369	73.494			2.97346					72.8571	53.9881	139.157	486.145	120.31			8.20633		25.4688			125	79.7619			486.747			0.362357
79.4531	68.6012	99.2586	1680.72	73.494			36.0546					72.8571	96.1905	304.819	486.145	140.361			5.5526		25.2051			211.875	104.762			486.747			0.330385
79.4531	58.2483	107.53	840.361	73.494			9.18683					89	359.524	440.361	392.771	168.434			5.44602		16.8359			211.875	946.429			486.747			0.191836
99.375	60.084	117.306	840.361	73.494			12.5759					406.25	397.619	228.614	294.578	267.871			5.05169					180.625	946.429			486.747			0.223809
707.5	45.3869	129.036	483.133	48.996								315.417	198.81	73.2358	392.771	281.325			8.50474					95	79.7619			486.747			0.277097
692.5	36.3095	117.306	483.133	48.996								78.4615	128.571	228.614	392.771	140.562			3.0907					266.25	79.7619			486.747			0.298412
138.75	37.5616	143.373	322.088	39.759								63.75	128.571	85.4418	92.7711	122.892			5.44602					180.625	79.7619			486.747			0.245124
90.625	41.8956	129.036	322.088	137.349								63.75	81.8182	266.265	92.7711	135.663			3.18661					265	1040.48			486.747			0.277097
70.4861	46.4286	80.6476	280.482	137.349								63.75	81.8182	220.482	72.2892	135.663			18.1818					265	251.19			486.747			0.234467
66.7763	68.1746	215.06	142.716	137.349								63.75	90	66.1898	72.2892	225.301			19.0771					125	227.778			486.747			0.127891
70.4861	83.4821	67.9138	112.134	137.349								63.75	128.571	55.7387	72.2892	187.952			4.88117					141.25	227.778			486.747			0.170521
66.7763	136.905	135.112	153.012	137.349								63.75	278.571	58.8353	233.133	187.952			7.14057					105.938	1040.48			486.747			0.138548
66.8421	410.119	124.94	1132.53	138.554								63.75	417.857	88.1526	192.169	146.024			5.3501					180.625	155.952			486.747			0.149206
63.5	190.476	71.6867	1131.33	138.554								63.75	226.488	96.1665	153.735	146.024			6.77822					120.833	176.19			486.747			0.202494
63.5	267.857	67.9138	840.361	138.554								63.8281	205.952	117.537	139.759	146.024			7.48162					181.25	177.381			486.747			0.202494
63.5	120.238	71.6867	1680.72	138.554								68.0833	308.929	117.537	128.112	140.562			2.25941					266.25	227.778			204.217			0.181179
63.5	68.1818	92.1687	560.241	138.554								68	180.476	117.537	139.759	140.562			5.80838					132.5	227.778			204.217			0.117233
66.8421	59.6429	92.1687	420.181	138.554								72.8571	425.595	117.537	386.345	140.562			13.9508					265	336.905			486.747
70.5556	97.4206	92.1687	420.181	138.554								72.8571	522.619	124.548	579.518	160.723			3.49568					423.75	1040.48			486.747
66.8421	90.0183	92.1687	840.361	138.554								78.4615	122.619	160.843	386.345	140.562			6.14942					423.75	1040.48			486.747
70.5556	106.385	92.1687	1680.72	138.554								78.4615	290.476	130.637	231.807	120.31			6.72493					211.875	125			486.747
70.5556	120.106	92.1687	730.12	138.554								72.8571	161.19	114.307	231.807	120.31			5.37142					211.875	914.286			408.434
81.5833	148.512	92.1687	730.12	146.988								72.8571	93.7229	130.637	193.173	160.723								180.625	447.024			408.434
81.5833	89.2857	92.1687	730.12	146.988								72.8571	73.6395	152.41	231.807	200.904								180.625	461.905			218.876
79.4531	592.857	92.1687	492.771	146.988								72.8571	107.976	228.614	386.345	187.952								180.625	461.905			218.876
74.7794	325	86.0241	360.843	146.988								72.8571	72.619	228.614	386.345	133.936								266.25	461.905			328.313
74.7794	235.714	92.1687	280.12	73.494								78.3654	91.6667	228.614	289.759	135.422								133.125	125.397			328.313
74.7794	275.893	99.2586	483.133	73.494								86.0227	100.265	93.2092	231.807	135.663								266.25	127.679			245.783
74.7794	252.976	107.53	322.088	73.494								86.0227	98.1602	205.542	336.546	163.855								141.25	130.952			486.747
74.7794	786.905	129.036	233.735	73.494								126.964	225.298	70.6024	336.948	281.928								211.875	163.393			204.217
79.4531	772.619	107.53	175.301	39.759								377.5	128.741	62.2962	336.948	281.928								211.875	251.19			218.876
79.4531	386.31	75.9036	151.707	48.996								888.75	100.132	81.4643	252.711	187.952								423.75	341.667			328.313
90.8036	91.4021	321.285	140.037	48.996								118.281	89.881	96.276	208.434	450.602								97.5	341.667			328.313
229.5	59.7789	117.306	1132.53	50								72.8571	82.967	96.1665	123.877	718.072								180.625	172.024			328.313
208.125	69.7421	71.6867	442.972	137.349								68	77.0408	117.537	123.877	39.759								180.625	319.048			328.313
94.0385	67.8571	71.6867	216.265	137.349								63.75	49.026	117.537	168.474	182.53								180.625	496.429			245.783
90.625	91.5344	80.6476	560.241	137.349								68	46.8944	105.783	138.956	140.562								180.625	496.429			486.747
66.7763	154.524	92.1687	355.422	137.349								63.75	51.3605	117.537	156.325	120.482								180.625	496.429			243.373
66.7763	58.1633	92.1687	355.422	137.349								63.75	53.9286	124.548	294.578	140.562								266.25	48.8095			577.108
70.5556	58.1633	92.1687	420.181	138.554								63.6719	301.19	137.866	235.663	140.562								266.25	1040.48			245.783
70.5556	67.9563	92.1687	840.361	138.554								63.6719	301.19	110.843	294.578	140.562								266.25	520.238			246.988
70.4861	58.2483	92.1687	840.361	138.554								63.75	323.214	110.843	392.771	140.562								266.25	388.69			246.988
63.4375	50.9673	92.1687	840.361	138.554								63.75	149.107	130.637	392.771	140.562								133.125	194.345			245.783
63.4375	52.5132	92.1687	560.241	138.554								63.75	128.571	130.637	392.771	120.482								266.25	182.738			328.313
63.5	49.7494	99.2586	336.145	138.554								63.75	128.571	130.637	302.41	120.482								266.25	457.143			328.313
63.5	49.0842	92.1687	240.103	138.554								63.75	100	182.892	72.2892	133.936								133.125	46.4286			245.783
66.8421	42.5397	86.0241	210.09	137.349								63.75	90	152.41	229.398	122.892								266.25	447.024			245.783
66.8421	39.881	80.6476	210.09	137.349								72.8571	100	152.41	192.169	122.892								141.25	751.19			486.747
66.8421	42.9487	92.1687	240.103	138.554								72.8571	100	80.3213	192.169	122.892								423.75	44.0476			577.108
70.5556	40.8571	99.2586	483.133	138.554								102	179.762	87.6232	170.817	140.448								423.75	252.976			325.301
70.5556	58.0586	107.53	280.482	138.554								72.8571	143.878	146.816	153.735	135.663								266.25	461.905			575.904
84.6667	168.849	99.2586	197.858	138.554								72.8571	94.3723	102.771	118.258	163.855								181.25	461.905			575.904
111.25	142.262	107.53	222.59	138.554								72.8571	181.19	75.6454	118.258	140.964								120.417	376.19			177.108
79.375	77.5974	56.1027	132.358	146.988								72.8571	86.9048	128.464	579.518	140.964								90.3125	376.19			177.108
74.7794	91.2698	67.9138	233.735	146.988								72.8571	240.476	117.671	1159.04	140.964								90.3125	127.679			177.108
74.7794	341.667	89.2427	216.265	146.988								72.8571	201.488	117.671	579.518	187.952								266.25	127.679			177.108
74.7794	85.7143	67.9138	216.265	146.988								72.7679	161.19	117.537	386.345	69.8795								266.25	130.952			173.494
74.7794	57.0106	67.9138	216.265	73.494								81.7708	115.136	117.537	386.345	184.337								266.25	167.46			174.096
74.7794	59.6429	107.53	432.53	146.988								109.028	85.9127	117.537	386.345	157.831								266.25	346.429			178.313
74.7794	59.6429	107.53	432.53	73.494								444.375	79.304	117.537	386.345	560.241								133.125	346.429			356.627
79.4531	90.0183	99.2586	432.53	73.494								236.562	72.619	124.548	386.345	81.9277								133.125	346.429			217.47
90.8036	97.5198	99.2586	432.53	39.759								85	104.762	137.866	231.807	168.434								133.125	229.365			216.867
229.5	93.8776	99.2586	432.53	50								63.75	104.762	160.843	193.173	120.31								266.25	383.333			490.361
128.75	109.524	99.2586	432.53	48.996								68	145.536	293.976	165.577	140.562								141.667	28.5714			490.361
108.295	109.524	99.2586	739.759	50								68	194.048	152.41	156.325	140.361								141.667	28.5714			490.361
91.6346	143.537	107.53	420.181	137.349								63.75	194.048	130.637	165.577	140.562								212.5	28.5714			243.775
79.375	251.19	99.2586	420.181	137.349								63.75	518.452	130.637	193.173	140.562								141.667	28.5714			181.325
70.4861	502.381	92.1687	420.181	137.349								63.6719	398.81	130.637	231.807	140.562								266.25	24.4048			144.578
66.7763	386.31	99.2586	420.181	137.349								63.6719	398.81	130.637	231.807	140.562								158.75	520.238			490.361
66.7763	193.155	86.0241	840.361	138.554								63.6719	150.397	130.637	178.657	140.562								266.25	305.952			490.361
63.4375	91.4021	92.1687	840.361	138.554								63.75	128.912	152.41	231.807	140.562								120.417	182.738			490.361
63.4375	76.0823	86.0241	419.88	138.554								63.75	112.649	304.819	289.759	105.422								120.417	46.4286			495.181
63.4375	64.3773	80.6476	280.12	138.554								63.75	98.0519	120.633	336.948	120.482								266.25	291.27			490.361
66.7763	69.7421	80.6476	240.103	138.554								63.75	82.967	160.843	252.711	120.482								133.125	142.857			490.361
66.8421	91.5344	80.6476	210.09	138.554								63.75	53.9286	171.285	208.434	122.892								106.25	751.19			345.783
66.8421	137.103	86.0241	210.09	137.349								63.75	89.881	128.464	93.253	122.892								70.8333	265.079			490.361
66.8421	193.155	143.373	210.09	137.349								72.8571	107.857	171.285	93.253	140.448								120.833	58.3333			425.301
70.5556	193.155	249.639	483.133	137.349								72.8571	53.9286	171.285	125.06	140.448								266.25	116.667			425.301
74.7059	125.298	208.032	241.566	137.349								72.8571	51.3605	265.863	96.2002	246.084								266.25	116.667			425.301
90.7143	167.063	208.032	234.251	137.349								72.8571	51.3605	146.816	96.2002	141.265								266.25	116.667			425.301
79.5	170.833	107.53	273.293	138.554								72.8571	53.9286	132.38	156.325	188.353								266.25	116.667			490.361
74.7059	56.6667	99.2586	163.976	138.554								72.8571	167.46	166.064	201.807	113.012								266.25	115.476			490.361
74.7059	58.1633	73.494	233.735	138.554								68	71.8537	137.866	201.807	163.855								133.125	433.333			144.578
74.7794	54.3651	78.0873	215.663	138.554								68	143.537	128.313	294.578	141.265								423.75	238.69			144.578
74.7794	40.7738	89.3287	216.265	146.988								72.8571	315.079	160.843	294.578	451.807								423.75	44.0476			425.301
74.7794	42.9654	104.217	216.265	146.988								72.8571	315.476	265.863	294.578	150.201								211.875	188.095			425.301
74.7794	44.6429	138.956	216.265	146.988								81.7708	282.143	265.863	241.928	217.47								243.75	127.679			425.301
74.7794	49.1071	117.415	432.53	73.494								122.656	128.571	398.795	241.928	393.976								243.75	162.857			245.181
79.4531	43.5714	99.3513	277.912	73.494								888.75	150	293.976	192.169	393.976								266.25	125.397			344.578
108.523	45.5782	99.3513	277.912	73.494								92.7273	128.571	182.892	153.735	196.988								133.125	346.429			244.578
192.25	39.881	92.2547	232.831	50								68	90.119	152.41	170.817	268.675								266.25	346.429			144.578
181.875	41.358	92.2547	232.831	50								72.8571	81.9264	130.637	170.817	246.687								133.125	346.429			425.301
229	41.358	99.3513	232.831	48.996								63.75	75.0992	130.637	170.817	268.675								266.25	40.4762			245.181
229	62.8968	138.688	198.795	50								63.75	90	114.307	128.112	260.843								266.25	458.333			344.578
79.2969	357.738	138.688	950.602	137.349								63.6719	94.4805	130.637	109.811	157.831								141.25	244.048			344.578
70.4861	125.149	124.819	739.759	137.349								63.6719	79.9451	152.41	1009.64	157.831								243.75	244.048			489.157
66.7763	55.6217	113.472	419.88	137.349								63.6719	129.911	182.892	118.258	157.831								133.125	28.5714			489.157
63.4375	59.2491	107.53	295.984	137.349								63.6719	138.69	182.892	65.0602	307.229								120.833	226.786
63.4375	273.81	92.1687	295.984	137.349								63.6719	226.19	357.831	231.807	678.313								266.25	226.786
63.4375	33.3333	86.0241	840.361	137.349								63.6719	161.19	715.663	231.807	421.084								132.5	46.4286
63.4375	134.524	75.9036	559.839	138.554								63.6719	115.136	95.9474	231.807	210.542								265	46.4286
66.7763	132.143	75.9036	559.839	138.554								63.6719	115.136	160.843	231.807	140.361								265	44.0476
66.7763	91.6667	80.6476	336.145	138.554								63.75	103.095	265.863	165.577	120.31								266.25	198.81
70.5556	73.2993	86.0241	240.103	138.554								63.75	103.095	171.486	193.173	140.361								266.25	58.3333
70.5556	73.2993	92.1687	210.09	138.554								68	104.592	220.181	193.173	140.361								120.833	116.667
74.7059	66.2698	99.2586	211.36	138.554								72.8571	122.222	265.863	193.173	140.361								120.833	116.667
74.7059	97.5198	113.472	210.09	138.554								72.8571	104.762	205.542	193.173	146.024								298.75	116.667
74.5312	62.2024	143.24	186.506	138.554								72.8571	146.905	171.285	156.325	140.562								298.75	116.667
74.5312	82.1429	85.9438	241.566	138.554								72.8571	146.667	128.464	138.956	140.562								270	116.667
74.7059	93.8776	117.196	240.723	137.349								68	146.667	128.464	138.956	120.482								268.75	116.667
74.7059	125.595	104.116	240.723	137.349								63.75	398.81	128.464	156.325	120.482									121.429
74.5312	125.595	78.1627	168.072	137.349								63.75	398.81	114.19	178.657	120.482									433.333
74.7794	200.952	89.3287	212.651	138.554								63.75	398.81	160.843	178.657	120.482									216.667
74.7794	502.381	96.2002	291.566	138.554								72.8571	127.827	265.863	178.657	122.892									216.667
74.7794	679.762	125.06	291.566	138.554								75.4808	112.798	205.542	231.807	140.448									433.333
74.7794	276.19	107.631	431.325	138.554								98.125	112.798	205.542	231.807	140.448									834.524
79.4531	271.429	92.2547	431.325	138.554								196.25	71.9048	293.574	336.546	122.892									188.095
84.75	110.374	129.157	215.663	40.9639								289.583	71.9048	130.637	336.546	140.448									182.619
91.0417	91.4021	104.116	215.06	73.494								289.583	89.881	130.637	336.546	217.47									69.0476
133.125	91.4021	92.2547	233.735	73.494								105.139	89.881	130.637	138.956	246.084									173.81
45	59.7789	124.94	215.663	73.494								78.4615	119.841	130.637	116.566	140.62									173.81
198.333	83.6905	124.94	216.265	73.494								68	77.0408	130.637	156.325	164.056									90.4762
108.182	102.976	113.582	216.265	40.9639								63.75	51.3605	130.637	104.217	141.265									488.095
70.4861	102.827	99.2586	216.265	40.9639								63.6719	51.3605	130.637	90.7631	141.265									488.095
66.7763	117.517	113.582	432.53	39.759								63.6719	51.3605	130.637	97.2461	141.265									145.238
63.4375	128.77	113.582	216.265	50								63.6719	77.0408	110.71	134.538	163.855									141.071
63.4375	128.77	92.1687	232.831	48.996								63.6719	67.4107	209.94	156.325	163.855									226.786
63.4375	154.524	86.1044	232.831	48.996								63.6719	59.9206	419.88	113.691	289.96									151.19
63.4375	47.2222	86.0241	232.831	138.554								63.6719	56.8783	715.663	113.691	289.96									273.214
63.4375	50	80.6476	232.831	138.554								63.6719	127.083	138.038	151.205	173.976									502.381
70.4861	47.2222	75.9036	198.795	137.349								63.6719	203.333	87.9518	172.806	157.59									365.476
70.5556	42.9198	75.9036	198.795	137.349								63.6719	213.69	161.044	172.806	210.542									57.7381
74.7059	45.0113	86.0241	739.759	137.349								63.6719	191.369	322.49	143.675	157.59									116.667
74.7059	44.6429	92.1687	559.839	137.349								63.75	112.5	205.783	143.675	986.747									116.667
74.7059	44.4099	99.1659	355.181	137.349								63.75	100	293.574	139.759	493.373									116.667
74.7059	51.0714	99.1659	295.984	137.349								72.8571	128.571	220.181	170.817	789.157									116.667
74.7059	44.4099	208.032	335.904	138.554								72.8571	90	205.542	139.759	789.157									116.667
74.5312	41.358	86.0241	419.88	138.554								72.8571	75	171.285	128.112	789.157									116.667
74.5312	39.881	85.9438	559.839	138.554								63.75	74.2347	146.816	118.258	789.157									116.667
74.7059	41.358	99.2586	242.972	138.554								63.6719	86.6071	171.285	115.02	394.578									217.262
74.7059	69.7917	92.1687	188.755	138.554								63.6719	74.2347	128.464	65.0602	197.289									216.667
74.7794	78.8095	83.3735	209.94	138.554								63.6719	59.7222	128.464	106.827	197.289									216.667
74.7794	97.4026	96.2002	209.94	138.554								63.75	103.929	220.181	289.759	173.494									216.667
74.7794	60.582	104.217	210.09	138.554								68	187.381	398.795	231.807	157.831									433.333
79.5833	58.8936	104.217	210.09	137.349								75.4808	143.452	205.542	231.807	157.831									433.333
79.4531	83.4325	99.3513	210.09	137.349								75.4808	95.6349	171.285	165.577	157.831									834.524
79.4531	174.107	107.631	299.197	137.349								81.7708	143.452	182.892	165.577	425.301									370.238
79.4531	32.1429	124.94	200.602	137.349								289.583	226.19	152.41	165.577	365.06									69.0476
190	102.619	113.582	149.398	137.349								144.792	201.786	130.637	193.173	202.008									69.0476
133.125	74.7024	113.582	212.651	138.554								108.214	100.893	130.637	193.173	606.024									91.6667
82.5	74.1497	124.94	224.096	138.554								252.5	100.893	125.151	193.173	140.361									91.6667
156.25	72.7891	156.175	224.096	138.554								145	114.55	130.637	156.325	168.434									150
85	65.7143	113.582	224.096	40.9639								68	104.592	114.307	138.956	210.542									141.071
79.2969	65.7143	92.1687	224.096	40.9639								63.75	122.024	130.637	138.956	280.723									226.786
63.4375	104.63	99.2586	431.325	40.9639								63.75	104.762	182.892	138.956	280.723									151.19
63.4375	111.64	99.2586	215.663	40.9639								63.6719	113.69	142.341	156.325	105.271									273.214
63.4375	111.64	80.6476	215.663	40.9639								63.6719	108.571	209.94	178.657	140.361									218.571
63.4375	100.476	80.6476	215.663	74.0964								63.6719	155.102	279.92	156.325	140.361									901.19
63.4375	125.595	80.6476	215.663	74.0964								63.6719	146.667	279.92	208.434	210.542									901.19
63.4375	1004.76	80.5723	215.663	74.0964								63.6719	398.81	199.699	231.807	140.361									710.714
63.4375	544.643	75.9036	234.94	74.0964								63.6719	398.81	266.265	231.807	182.53									116.667
63.4375	227.619	75.9036	234.94	74.0964								63.6719	113.624	399.398	252.41	140.562									116.667
70.4861	284.524	80.6476	216.265	50								63.6719	102.262	399.398	336.546	140.562									116.667
70.5556	114.583	96.0148	216.265	49.3976								63.6719	78.663	293.976	336.546	140.562									116.667
70.4861	102.679	124.819	199.197	48.996								63.75	67.4107	293.976	250.12	182.53									116.667
74.7059	82.2619	99.1659	216.265	48.996								68	63.4454	293.976	312.651	187.952									116.667
74.7059	82.2619	117.196	216.265	137.349								68	67.4107	220.181	104.116	140.562									116.667
74.7059	82.381	389.558	216.265	138.554								68	71.9048	171.285	90.7631	122.892									217.262
74.7059	91.5344	129.036	216.265	138.554								63.75	82.967	171.285	90.7631	109.237									216.667
74.7059	102.827	99.2586	232.831	138.554								63.6719	71.9048	220.181	104.116	122.892									144.444
74.7794	91.4021	117.306	232.831	138.554								63.6719	51.3605	220.181	125.06	122.892									190.179
74.7794	82.2619	99.2586	232.831	137.349								63.6719	51.3605	205.542	104.217	140.448									433.333
74.8529	96.5774	80.6476	198.795	137.349								63.6719	46.8944	205.542	104.217	140.448									433.333
74.8529	154.524	86.0241	198.795	137.349								63.6719	107.857	182.892	97.4182	122.892									181.905
74.8529	188.095	113.691	559.438	138.554								59.9265	63.4454	152.41	102.49	109.371									301.19
74.8529	47.2222	104.217	559.839	138.554								59.9265	56.7669	152.41	114.94	109.371									469.048
74.8529	47.2222	104.217	275.1	138.554								63.6719	56.8783	152.41	114.94	164.056									469.048
79.5312	44.7368	99.3513	364.458	138.554								81.7708	101.667	130.637	107.756	113.012									244.94
84.75	47.2619	124.94	419.88	138.554								85.9091	203.333	125	132.623	113.012									159.014
174.821	44.6429	113.582	335.904	138.554								942.5	473.81	125.151	170.817	140.448									326.587
152.969	44.4099	113.582	262.995	138.554								434.375	199.603	111.245	128.112	122.892									611.905
211.042	46.5774	107.53	335.904	138.554								173.75	112.5	91.0186	128.112	140.448									91.6667
111.875	48.6025	117.306	145.783	137.349								124.107	90	130.637	128.112	163.855									151.19
124.464	44.6429	99.2586	209.94	137.349								108.594	100	130.465	115.02	173.976									273.214
79.2969	44.6429	92.1687	209.94	137.349								189.375	100	130.637	65.0602	140.62									218.571
70.4861	42.9487	86.0241	209.94	137.349								352.5	112.5	238.554	65.0602	109.371									901.19
63.4375	42.9487	80.6476	210.09	137.349								96.6667	90	267.871	106.827	123.042									412.5
63.4375	58.7719	80.6476	210.09	138.554								63.75	79.9451	209.94	106.827	140.62									413.69
63.4375	160.952	80.6476	218.589	138.554								63.75	94.4805	279.92	106.827	210.542									116.667
63.4375	63.0252	80.6476	299.197	40.9639								63.75	79.9451	279.92	231.807	492.169									116.667
63.4375	49.5671	75.9036	212.651	70.4819								63.6719	59.7222	186.506	165.577	719.277									308.333
63.4375	52.6942	80.5723	212.651	70.4819								63.6719	103.929	266.265	144.88	328.916									116.667
63.4375	66.746	80.6476	224.096	70.4819								63.6719	156.151	266.265	144.88	986.747									116.667
63.4375	139.286	85.9438	224.096	40.9639								63.6719	143.452	399.398	165.577	986.747									116.667
74.6324	179.167	92.1687	224.096	40.9639								63.6719	71.7262	399.398	165.577	328.916									115.476
97.5962	108.631	138.688	224.096	40.9639								63.6719	86.9048	399.398	193.173	246.687									216.667
84.5833	74.2063	117.196	224.096	40.9639								63.6719	226.19	293.976	193.173	263.052									190.179
103.636	74.1497	99.1659	224.096	72.8916								63.6719	380.952	293.976	156.325	394.578									190.179
114.625	74.0741	99.1659	156.627	74.0964								67.9167	115.306	293.976	156.325	394.578									433.333
74.7059	93.8776	85.9438	156.627	73.494								102	100.893	293.976	138.956	197.108									433.333
74.7059	93.8776	129.036	157.831	73.494								135.179	103.095	293.976	138.956	394.578									303.175
74.7794	111.64	117.306	215.663	73.494								81.875	104.592	293.976	156.325	328.514									301.19
74.7794	111.64	99.2586	215.663	146.988								68	146.429	293.976	138.956	197.108									301.19
74.7794	111.64	117.306	215.663	146.988								63.6719	116.19	293.574	156.325	164.257									278.274
74.8529	100.476	107.53	215.663	49.3976								63.6719	122.222	293.574	156.325	164.257									159.014
74.8529	167.46	80.6476	215.663	49.3976								63.6719	104.932	293.574	156.325	197.108									278.274
74.8529	502.381	80.6476	215.663	49.3976								63.6719	116.429	228.614	156.325	173.494									669.048
74.8529	272.321	104.217	215.663	49.3976								63.6719	169.048	182.892	156.325	78.9157									189.583
74.8529	189.683	124.94	215.663	72.8916								63.6719	113.624	152.41	178.657	78.9157									252.778
74.8529	284.524	113.582	215.663	50								59.9265	129.252	152.41	312.651	141.767									430.952
90.8929	181.548	124.94	149.398	138.554								59.9265	140.816	130.637	336.546	365.06									432.143
115.682	205.357	104.116	149.398	138.554								63.6719	157.143	130.637	416.466	240.964									546.429
223.75	102.679	113.582	149.398	138.554								72.6786	68.1746	130.637	178.485	200.602									901.19
247.5	82.2619	156.175	149.398	138.554								85.9091	51.3605	111.245	101.019	210.542									901.19
101.979	82.2619	156.175	176.707	137.349								135	53.9286	111.245	90.7631	606.024									116.667
203.958	82.381	107.53	176.707	137.349								942.5	56.7669	125.151	93.8038	140.361									116.667
407.5	109.643	92.1687	232.831	137.349								144.792	63.4454	125.151	93.8038	140.361									116.667
407.5	156.633	86.0241	232.831	137.349								173.75	77.0408	125.151	113.691	168.434									308.333
141.25	130.804	86.0241	232.831	137.349								289.583	77.0408	111.111	113.691	168.434									308.333
297.5	116.27	80.6476	198.795	138.554								173.75	77.0408	357.831	97.4182	168.434									116.667
74.6324	110.374	80.6476	198.795	138.554								189.375	63.4454	357.831	107.756	210.542									115.476
70.4861	257.54	80.6476	99.3976	138.554								217.5	49.026	147.992	107.756	339.157									115.476
66.7763	54.3651	75.9036	559.438	138.554								63.75	53.9286	120.884	107.756	168.434									380.357
66.7763	74.1342	75.9036	99.3976	138.554								63.75	67.4107	111.145	123.15	120.31									190.179
63.4375	62.7289	75.9036	296.386	138.554								63.6719	59.9206	126.85	118.258	93.5743									152.143
63.4375	58.2483	75.8327	364.458	138.554								63.6719	51.3605	842.169	139.759	140.361									909.524
63.4375	47.9692	75.8327	186.919	138.554								63.6719	53.9286	286.747	139.759	140.361									301.19
63.4375	39.2857	80.5723	184.096	137.349								63.6719	56.8783	210.241	128.112	140.361									301.19
63.4375	45.5026	124.819	204.552	137.349								63.6719	100.595	168.193	139.759	140.361									133.333
63.4375	45.5026	138.688	279.92	137.349								63.6719	473.81	140.161	143.775	140.562									371.032
79.2969	44.7143	75.8327	279.92	137.349								63.6719	100.397	140.161	103.614	182.53									556.548
170.179	46.5774	75.8327	209.94	138.554								63.6719	100	168.193	106.827	240.964									7.14286
400	46.5278	75.8327	209.94	138.554								63.6719	90	266.265	106.827	169.578									352.381
200	55.8333	75.8327	209.94	70.4819								101.875	100	399.398	106.827	140.562									198.81
169.5	48.5507	232.831	210.09	70.4819								472.5	100	399.398	193.373	140.562									430.952
74.7059	42.9487	133.046	255.02	70.4819								113.194	100	399.398	165.749	122.892									116.667
74.7794	42.9487	132.874	299.197	40.9639								68	115.476	399.398	145.03	140.448									116.667
74.7794	54.5635	116.265	356.225	40.9639								63.6719	115.476	293.976	144.88	140.448									115.476
74.7794	51.0204	121.954	318.976	39.759								63.6719	86.6071	293.976	144.88	140.448									205.159
74.7794	40.388	121.954	318.976	39.759								63.6719	77.8061	293.976	144.88	140.448									205.159
74.8529	40.0476	116.416	224.096	73.494								63.6719	79.9451	293.976	165.577	122.892									115.476
74.8529	36.678	117.306	224.096	73.494								63.6719	86.7216	293.976	193.173	109.237									115.476
74.8529	42.791	143.373	224.096	73.494								63.6719	117.113	293.976	156.325	109.371									380.357
74.8529	383.333	129.036	224.096	73.494								67.9167	143.452	293.976	156.325	109.371									253.571
74.8529	215.476	138.956	224.096	73.494								67.9167	86.9048	293.976	156.325	109.371									190.179
74.8529	386.905	117.306	224.096	73.494								67.9167	192.46	293.976	138.956	109.371									271.429
170.714	145.04	92.1687	224.096	146.988								75.3846	288.69	293.976	138.956	109.237									570.238
398.333	87.0238	113.691	224.096	49.3976								135	161.429	182.892	138.956	109.237									397.619
275.417	117.113	104.217	224.096	49.3976								942.5	103.214	182.892	138.956	109.237									353.571
196.667	78.2967	113.582	224.096	73.494								942.5	103.214	152.41	138.956	109.237									133.333
196.667	93.6905	113.582	195.181	72.8916								471.25	291.071	130.637	140.416	140.448									133.333
135.972	93.6905	113.582	195.181	138.554								868.75	290.476	130.637	128.715	140.62									133.333
570	103.042	99.2586	195.181	138.554								217.188	169.048	130.637	126.691	98.4337									7.14286
296.875	111.64	99.2586	196.386	138.554								85.7955	145.536	130.637	128.715	123.042									7.14286
296.875	91.342	117.306	196.386	138.554								434.375	145.536	101.606	164.157	164.056									704.762
74.6324	91.342	129.036	215.06	138.554								288.75	120.833	91.0186	416.867	246.084									704.762
70.4861	111.64	107.53	199.598	138.554								189.375	861.905	111.245	416.867	196.867									352.381
66.7763	143.537	92.1687	199.598	138.554								252.083	150.794	125.151	208.434	140.62									352.381
66.7763	136.458	86.0241	199.598	138.554								58.75	140.816	152.41	124.94	109.371									352.381
63.4375	181.944	80.6476	199.598	138.554								698.75	73.0442	179.217	101.019	719.277									475
63.4375	189.683	80.6476	215.663	138.554								63.75	51.3605	358.434	93.8038	246.687									115.476
63.4375	227.619	80.6476	215.663	138.554								63.75	51.3605	111.145	87.5502	493.373									115.476
63.4375	195.536	80.6476	215.663	138.554								63.6719	51.3605	121.017	104.116	267.47									115.476
63.4375	195.536	75.9036	215.663	138.554								63.6719	56.7669	121.017	104.116	394.578									205.159
63.4375	102.679	67.9138	142.685	137.349								63.6719	67.4107	111.145	104.912	328.916									205.159
66.7763	102.083	75.9036	142.685	137.349								63.6719	63.4454	126.85	102.49	263.052									115.476
70.4861	74.7835	75.9036	142.685	137.349								63.6719	59.9206	420.482	102.49	263.052									115.476
111.25	154.762	75.9036	149.398	137.349								63.6719	77.0408	210.241	118.258	263.052									380.357
551.25	174.405	83.2129	149.398	137.349								63.6719	82.967	399.398	118.258	197.108									380.357
105.75	174.405	104.016	149.398	138.554								63.6719	51.3605	126.85	109.811	164.257									253.571
91.7308	116.27	124.819	149.398	138.554								63.6719	53.9286	420.482	118.258	164.257									638.095
74.7794	116.27	75.8327	199.759	138.554								63.6719	51.3605	420.482	139.759	197.108									907.143
74.7794	174.405	75.9036	124.849	138.554								189	51.3605	421.084	153.735	197.108									176.786
74.7794	850	75.8327	155.221	138.554								101.875	46.8944	286.747	143.775	197.108									353.571
74.7794	451.19	75.9036	248.675	138.554								72.6786	51.3605	210.241	132.715	164.257									352.381
74.7794	451.19	75.8327	248.434	138.554								63.6719	59.6561	210.241	123.236	197.108									352.381
74.8529	225.595	186.265	147.59	138.554								63.6719	71.6667	140.161	502.811	179.217									352.381
74.8529	105.952	116.416	99.3976	137.349								63.6719	203.333	140.161	754.217	179.217									326.19
74.8529	116.497	161.295	99.3976	137.349								63.6719	159.524	140.161	1092.77	173.494									597.619
74.8529	84.0136	75.8327	151.807	137.349								63.6719	99.7024	168.193	1092.77	38.5542									298.81
79.5312	69.1877	186.265	151.807	137.349								67.9167	100	210.241	1092.77	118.072									475
398.333	58.5034	186.265	198.795	138.554								67.9167	81.8182	280.321	1092.77	240.964									115.476
275.417	40.9524	186.265	218.072	40.9639								67.9167	81.8182	210.241	65.0602	365.06									117.857
135.972	40.9524	186.265	141.325	70.4819								81.7708	81.8182	210.241	103.614	303.012									117.857
122.375	42.3645	132.874	117.771	70.4819								89.0909	112.5	210.241	106.827	200.602									117.857
236	41.0714	132.874	100.947	70.4819								701.25	103.929	210.241	106.827	140.361									96.0317
118.036	42.9945	116.416	122.731	70.4819								502.5	103.929	399.398	290.06	168.434									96.0317
413.125	42.9945	121.954	141.613	39.759								471.25	94.4805	399.398	193.373	140.361									253.571
74.6324	62.037	121.954	253.528	39.759								188.5	79.9451	399.398	165.749	140.361									380.357
74.6324	58.7719	116.416	188.956	39.759								94.25	94.4805	399.398	165.749	210.542									380.357
66.7763	42.9048	116.416	226.747	39.759								94.375	86.8132	399.398	145.03	200.602									135.714
66.7763	42.9487	155.221	188.956	39.759								104.861	103.274	399.398	138.956	140.361									271.429
63.4375	41.2088	186.265	246.084	73.494								81.6667	76.6667	399.398	138.956	140.361									466.667
63.4375	41.358	186.265	356.627	73.494								289.583	115.476	399.398	138.956	210.542									464.286
63.4375	40.5612	155.02	356.225	73.494								143.75	115.476	399.398	178.657	168.434									573.214
66.7763	37.8571	155.02	267.169	73.494								143.75	225	293.976	178.657	105.271									239.286
63.4375	35.7568	215.06	357.43	73.494								289.583	144.345	293.976	156.325	120.31									239.286
63.4375	41.7262	143.373	357.43	73.494								65.4167	79.3956	293.976	156.325	168.434									239.286
66.7763	62.1429	143.373	357.43	39.759								63.6719	86.0119	293.976	156.325	168.434									239.286
70.4861	388.095	117.196	224.096	98.7952								63.6719	291.071	293.976	156.325	168.434									75
79.2969	154.762	113.691	224.096	137.349								63.6719	290.476	228.614	138.956	267.871									352.381
133.333	87.1429	125.06	612.851	138.554								63.6719	291.071	182.892	138.956	230.522									352.381
99.375	72.7041	113.691	224.096	138.554								63.6719	145.536	182.892	138.956	140.562									352.381
91.7308	101.786	125.06	224.096	138.554								63.6719	145.536	182.892	140.416	134.137									352.381
74.7794	92.5325	124.94	224.096	138.554								63.6719	120.833	182.892	126.691	138.313									1195.24
74.7794	92.5325	117.196	224.096	138.554								63.6719	398.81	130.637	126.691	134.137									298.81
74.7794	92.5325	107.43	224.096	138.554								63.6719	861.905	121.821	126.691	134.137									200.198
74.7794	101.786	107.43	224.096	138.554								63.6719	226.19	125.151	154.458	134.137									834.524
74.7794	115.923	99.1659	196.386	138.554								63.6719	92.9654	114.307	208.434	135.663									117.857
74.8529	91.2338	85.9438	415.663	137.349								81.6667	51.3605	114.307	416.867	140.448									117.857
74.8529	99.2424	80.6476	195.181	138.554								189	49.0801	111.245	312.651	140.448									96.0317
74.8529	121.296	80.6476	195.181	138.554								72.6786	49.0801	91.0186	208.434	140.448									96.0317
74.8529	136.458	86.0241	196.386	138.554								67.8333	51.3605	83.4337	109.438	163.855									96.0317
91.9231	99.2424	86.0241	215.06	138.554								67.9167	53.9286	182.892	93.8038	122.892									253.571
398.333	136.458	86.0241	215.06	138.554								63.6719	56.7669	636.145	87.5502	124.269									380.357
148.438	227.619	80.6476	215.06	138.554								63.6719	53.9286	138.382	85.1657	98.4337									116.667
118.75	156.429	80.6476	215.06	138.554								63.6719	56.7669	110.994	104.819	98.4337									116.667
122.25	183.333	80.6476	199.598	138.554								67.9167	63.4454	110.994	104.819	98.4337									934.524
168.393	363.095	80.6476	199.598	138.554								67.9167	82.967	110.994	109.811	109.371									239.286
130.972	94.4444	80.6476	199.598	138.554								67.9167	56.7669	110.994	109.811	109.237									239.286
130.714	102.083	80.6476	199.598	137.349								67.9167	53.9286	110.994	109.811	109.237									239.286
223.75	91.4021	75.9036	149.699	137.349								94.5	51.3605	111.145	102.49	98.3133									477.381
159.062	154.762	80.6476	149.699	137.349								126.964	51.3605	127.022	107.756	140.448									477.381
510	154.762	83.2932	176.707	137.349								296.25	49.026	111.145	102.49	124.269									127.53
74.6324	116.27	104.116	215.663	137.349								942.5	49.026	798.795	109.811	124.269									267.063
70.4861	116.27	85.8635	142.685	137.349								942.5	56.5163	167.47	143.775	144.98									352.381
66.7763	116.27	75.8327	142.685	138.554								635	71.6667	210.241	143.775	196.988									459.524
66.7763	174.405	71.6198	163.705	138.554								434.375	203.571	210.241	115.02	262.651									244.048
63.4375	451.19	71.6198	142.685	138.554								117.969	71.4286	168.193	123.236	140.62									244.048
63.4375	451.19	75.8327	166.466	138.554								85.7955	180	140.161	377.108	123.042									298.81
63.4375	451.19	75.8327	149.398	138.554								78.6458	100	140.161	377.108	89.4852									239.048
66.7763	451.19	75.8327	149.398	138.554								75.3846	100	210.241	497.59	109.371									120.238
66.7763	451.19	75.9036	149.398	138.554								75.3846	90.119	210.241	415.663	109.371									117.857
66.7763	107.143	75.9036	166.466	137.349								89.0909	100	210.241	415.663	102.582									96.0317
66.7763	54.3651	186.265	163.705	137.349								189.375	81.8182	210.241	1092.77	119.679									96.0317
66.7763	61.4286	200.482	177.453	137.349								378.125	81.8182	210.241	1092.77	359.639									116.667
70.4861	53.4161	186.265	177.453	137.349								378.125	100	210.241	1092.77	246.687									116.667
74.7794	45.5026	186.265	207.028	137.349								134.821	94.4805	210.241	1092.77	328.916									934.524
74.7794	36.1345	232.831	381.928	40.9639								189.062	94.4805	210.241	65.0602	394.578									586.905
74.7794	38.3929	186.265	286.446	40.9639								411.25	94.4805	210.241	142.169	394.578									239.286
74.7794	41.0714	155.02	261.687	40.9639								63.6719	86.6071	798.795	365.06	394.578									225
74.7794	41.4021	132.874	261.687	70.4819								63.6719	79.9451	798.795	365.06	263.052									351.19
74.7794	42.9945	137.199	265.06	70.4819								63.6719	99.026	798.795	273.795	394.578									351.19
74.7794	42.9487	121.954	530.12	40.9639								63.6719	135.119	399.398	193.373	394.578									460.714
74.7794	63.0952	121.954	149.096	40.9639								63.6719	120.106	399.398	165.749	246.386									390.476
74.7794	44.6925	121.954	108.712	69.8795								63.6719	82.483	399.398	165.749	164.257									234.524
74.8529	41.358	116.416	114.985	69.8795								63.6719	96.2302	399.398	139.09	164.257									117.857
74.8529	41.358	116.416	94.2169	39.759								63.6719	81.4286	399.398	139.09	164.257									96.0317
74.8529	41.358	133.046	94.2169	39.759								63.6719	100	399.398	139.09	197.108									96.0317
85.3571	39.881	186.265	94.2169	39.759								63.6719	62.395	399.398	156.325	328.514									976.19
199.167	37.8571	186.265	122.453	73.494								63.6719	90.9091	293.976	178.657	246.386									934.524
510	39.1626	155.02	137.349	73.494								63.6719	209.921	293.976	178.657	197.108									226.19
255	47.6757	155.02	226.747	73.494								63.6719	333.73	293.976	178.657	197.108									368.452
148.438	119.898	186.024	226.747	146.988								63.5938	333.73	293.976	156.325	179.217									351.19
122.25	256.548	250.602	299.197	73.494								63.5938	145.536	293.976	156.325	179.217									477.381
101.875	111.161	250.602	299.197	73.494								67.8333	194.048	228.614	156.325	179.217									459.524
101.875	54.3452	161.295	356.225	73.494								67.9167	120.833	182.892	156.325	260.241									234.524
126.5	57.2055	153.012	267.169	138.554								67.9167	398.81	182.892	138.956	38.5542									117.262
111.023	101.786	133.886	357.43	138.554								67.9167	163.492	182.892	138.956	118.072									96.0317
98.9583	113.095	138.956	357.43	138.554								68.5156	122.619	182.892	131.325	118.072									288.095
106.042	90.5754	143.201	357.43	138.554								68.5156	85.3175	130.637	119.387	118.072									1090.48
115.114	84.8214	125.06	357.43	138.554								68.5156	51.1905	121.821	126.691	365.06									292.56
140.694	92.5325	113.691	224.096	138.554								68.5156	46.9462	130.637	140.416	365.06									272.619
645	101.786	107.43	459.639	138.554								84.3269	49.0801	130.637	145.917	200.602									272.619
101.979	100.357	117.196	224.096	138.554								109.028	51.4172	114.307	187.608	168.434									527.381
70.4861	90.9722	117.196	224.096	138.554								222.188	53.9881	93.6473	250.12	140.361									467.262
70.4861	121.296	92.0826	149.398	138.554								245	51.3605	114.307	250.12	140.361									305.655
66.7763	121.296	107.43	149.398	137.349								471.25	51.3605	130.637	156.325	140.361									225
66.7763	109.167	92.0826	224.096	137.349								756.25	59.9206	126.85	109.438	140.361									343.452
63.4375	136.458	80.5723	448.193	138.554								756.25	56.7669	71.6007	109.438	200.602									343.452
63.4375	112.925	80.5723	448.193	138.554								434.375	51.3605	88.7952	109.438	140.361									343.452
63.4375	195.536	80.5723	448.193	138.554								157.292	51.3605	147.992	101.019	120.31									117.262
66.7763	260.714	92.1687	311.245	138.554								94.375	56.7669	28.9157	101.019	105.271									39.2857
66.8421	181.548	99.2586	311.245	138.554								104.861	59.9206	110.994	90.8434	105.271									767.857
66.8421	94.4444	80.6476	415.663	138.554								75.3846	71.9048	110.994	109.811	120.31									1090.48
66.8421	76.9558	80.6476	634.94	138.554								75.3846	53.9286	127.022	109.811	120.31									1090.48
66.7763	97.9437	80.6476	196.386	138.554								75.3846	53.9286	111.145	102.49	120.31									272.619
74.6324	128.968	80.6476	196.386	138.554								75.3846	56.5789	110.994	107.756	105.271									272.619
70.625	110.544	80.5723	196.386	138.554								75.4808	76.7857	210.241	107.756	140.361									272.619
74.7794	104.643	75.8327	196.386	138.554								78.6458	239.286	800	107.831	200.904									527.381
74.7794	116.27	80.5723	196.386	137.349								75.3846	71.4286	238.554	107.831	240.964									527.381
74.7794	116.27	80.5723	215.06	137.349								70	590.476	168.193	115.02	172.892									263.69
74.7794	154.365	249.88	215.06	137.349								70	163.095	210.241	143.775	134.137									263.69
74.7794	54.1667	95.1807	215.06	137.349								126.25	163.095	168.193	156.846	138.313									55.9524
74.7794	108.333	75.8327	199.598	137.349								434.375	200	210.241	132.715	140.62									343.452
74.7794	451.19	71.6198	250	138.554								75.3846	128.571	210.241	251.406	140.62									343.452
74.7794	451.19	71.6198	199.598	138.554								63.5938	112.5	210.241	251.406	114.974									686.905
74.8529	451.19	75.8327	199.598	138.554								63.5938	112.5	210.241	377.108	114.974									139.286
74.8529	451.19	75.8327	149.699	138.554								63.6719	100	168.193	497.59	113.052									488.095
79.5312	451.19	75.8327	200	138.554								63.6719	90.119	168.434	497.59	140.448									39.2857
95.625	451.19	75.8327	200	138.554								63.6719	90.119	210.241	497.59	163.855									767.857
414.375	67.8571	75.8327	199.759	138.554								63.6719	90	210.241	502.811	122.892									1090.48
286.562	54.2857	75.9036	199.197	137.349								63.6719	112.5	210.241	502.811	109.237									545.238
191.042	50.8929	75.9036	142.685	137.349								63.6719	90.6746	210.241	502.811	109.237									272.619
104.318	58.5034	232.831	163.705	137.349								63.6719	90.6746	210.241	1092.77	98.4337									272.619
104.205	47.207	155.02	163.705	137.349								63.6719	83.6996	210.241	1092.77	98.4337									224.524
174.792	43.8776	308.032	163.705	71.0843								63.6719	83.6996	168.193	803.614	98.4337									351.587
420	40.9524	465.663	163.705	71.0843								63.6719	94.4805	800	547.59	109.371									351.587
191.042	38.3333	310.442	119.759	71.0843								65.3333	121.032	798.795	365.06	109.237									351.587
191.042	41.0714	465.663	149.699	40.9639								63.5938	108.095	798.795	273.795	109.237									54.1667
643.75	41.4021	465.663	149.699	71.0843								67.8333	108.095	798.795	273.795	98.3133									367.857
296.875	41.4021	220.482	166.265	71.0843								67.8333	110.119	399.398	273.795	89.3757									139.286
296.875	41.358	155.02	163.705	71.0843								67.8333	95.4365	399.398	231.807	109.237									139.286
148.438	41.2546	132.874	207.028	71.0843								67.8333	102.857	399.398	193.173	109.237									429.762
152.812	42.9487	155.221	145.114	40.9639								67.9167	73.4694	399.398	165.577	108.735									429.762
101.875	41.358	137.199	155.271	39.759								68.5156	66.369	399.398	144.88	124.269									511.905
101.875	41.358	137.199	248.434	39.759								68.5156	111.786	399.398	138.956	144.98									305.357
101.875	48.5507	121.954	310.542	69.8795								68.5156	181.548	399.398	138.956	89.4852									545.238
97.3077	39.881	121.954	223.924	39.759								68.5156	250.298	398.795	138.956	89.4852									272.619
97.3077	38.5057	116.416	163.012	39.759								91.3542	333.73	398.795	138.956	89.4852									1090.48
115.114	40.5187	133.046	195.934	73.494								134.821	291.071	293.976	178.485	98.4337									363.492
115.114	46.8254	133.046	149.096	146.988								222.188	291.071	293.976	178.657	98.4337									272.619
105.521	279.762	133.046	282.651	73.494								235.625	557.143	293.976	178.657	109.371									160.374
115.114	176.19	155.221	108.712	73.494								122.5	222.857	228.614	138.956	102.582									224.524
118.036	502.381	155.02	114.985	73.494								90.3125	396.429	182.892	138.822	359.639									311.905
165.25	84.9206	155.02	114.985	146.988								98.5227	1114.29	182.892	138.956	359.639									311.905
118.036	57.2055	155.02	94.2169	146.988								98.5227	140.136	182.892	138.822	246.687									54.1667
114.375	60.3836	155.02	94.2169	38.5542								188.25	85.3175	130.637	138.822	246.687									108.333
114.375	72.4603	155.02	94.2169	48.7952								93.75	93.0736	130.637	138.822	394.578									189.286
111.25	83.6081	308.032	168.373	138.554								112.5	73.1293	130.637	131.325	263.052									113.095
66.7105	83.6081	250.602	175.559	138.554								157.083	63.9881	130.637	109.337	263.052									139.286
66.7105	98.8095	250.602	204.819	138.554								471.25	49.026	130.637	102.937	263.052									429.762
70.4167	101.786	250.602	226.747	138.554								756.25	46.8944	114.307	131.325	328.514									429.762
70.4861	101.786	178.514	299.197	138.554								235.625	49.0801	83.1325	164.157	246.386									270.238
70.4861	101.786	200.482	267.169	138.554								157.083	51.4172	114.307	164.157	246.386									203.571
66.7763	84.5238	178.657	246.265	138.554								134.821	51.4172	152.41	218.876	197.108									203.571
66.7763	92.2078	167.068	357.43	138.554								85.7955	56.7669	200	187.608	197.108									1090.48
66.7763	93.006	152.84	357.43	138.554								81.6667	59.9206	600	131.325	140.792									1090.48
66.8421	106.293	128.916	357.43	138.554								75.3846	53.9286	110.994	131.325	140.792									220
66.8421	126.637	107.43	357.43	138.554								75.3846	49.026	77.0158	131.325	197.108									275
66.8421	144.728	117.196	357.43	138.554								75.3846	56.7669	88.7952	109.438	246.386									207.937
66.8421	131.746	117.196	149.398	138.554								75.4808	63.4454	110.994	116.033	246.386									567.857
74.7059	91.6667	107.43	148.193	138.554								75.4808	71.9048	126.85	100.562	164.257									567.857
88.0769	65	92.0826	149.398	137.349								75.3846	77.0408	110.994	88.7314	197.108									429.762
79.4531	97.9437	92.0826	149.398	138.554								75.3846	56.7669	110.994	94.2771	238.956									280.952
74.7794	82.8755	85.9438	148.193	138.554								65.3333	56.7669	139.96	105.196	179.217									510.714
74.7794	85.6151	85.9438	148.193	138.554								70	63.2353	111.145	96.0843	238.956									510.714
70.625	128.571	85.9438	224.096	138.554								75.3846	67.2619	110.994	101.417	238.956									255.357
70.625	85.3175	92.0826	448.193	138.554								117.969	144.643	98.6613	101.417	196.867									160.714
74.7794	104.643	80.6476	448.193	138.554								81.6667	163.095	398.795	107.831	196.867									203.571
74.7794	116.27	80.6476	448.193	138.554								75.4808	163.095	210.241	107.831	246.084									972.619
74.8529	250	80.6476	415.663	138.554								75.4808	163.095	210.241	115.02	328.112									972.619
74.8529	216.071	80.6476	415.663	138.554								65.3333	163.095	210.241	156.846	118.072									904.762
74.9265	144.286	80.5723	415.663	137.349								63.6719	150	210.241	156.846	365.06									754.762
74.9265	54.1667	75.8327	415.663	137.349								63.5938	112.5	168.193	156.846	202.008									233.333
84.9167	150.397	65.3012	415.663	137.349								63.5938	112.5	168.193	143.775	303.012									233.333
102.188	225.595	80.5723	634.94	137.349								63.6719	112.5	168.193	261.145	168.434									561.905
414.375	451.19	80.5723	196.386	137.349								63.6719	100.132	167.952	301.687	140.361									510.714
94.8077	451.19	99.1659	196.386	138.554								63.6719	90.119	168.193	301.687	140.361									341.667
94.8077	451.19	117.196	177.108	138.554								63.6719	112.649	168.193	261.145	140.361									510.714
88.0357	451.19	71.6198	233.133	138.554								63.6719	108.81	210.241	301.687	226.104									450.595
88.0357	451.19	71.6198	233.133	138.554								63.6719	98.9177	210.241	348.193	210.542									972.619
102.708	58.0357	71.6198	250	138.554								63.6719	90.6746	210.241	497.59	105.271									972.619
111.932	50.8929	71.6198	250	137.349								63.6719	83.6996	210.241	502.811	105.271									486.31
88.0357	45.2381	75.8327	250	137.349								63.6719	98.9177	210.241	502.811	120.31									583.333
82.1667	45.2381	75.8327	250	137.349								65.3333	140	210.241	502.811	133.936									29.7619
88.0357	38.7755	75.8327	250	137.349								81.6667	155.612	210.241	415.663	133.936									844.048
87.9464	48.0159	75.8327	200	71.0843								67.8333	114.762	210.241	1092.77	133.936									561.905
88.1731	39.7373	75.9036	200	71.0843								67.8333	120.106	210.241	1092.77	105.422									561.905
127.361	40.2636	75.9036	166.667	40.9639								67.8333	98.9177	463.253	1092.77	120.482									365.079
103.75	40.2636	75.8327	166.466	71.0843								67.8333	120.899	798.795	1092.77	160.723									246.825
118.5	41.4021	120.482	199.759	71.0843								68.4375	63.955	798.795	945.783	120.482									148.333
111.136	41.4021	120.482	142.685	71.0843								68.4375	64.3601	798.795	365.06	304.217									386.31
101.875	42.9487	232.53	163.705	71.0843								68.5156	93.6147	399.398	273.795	201.205									972.619
101.875	41.358	155.221	163.705	71.0843								68.5156	118.915	399.398	232.048	134.137									355.159
97.2115	39.881	137.199	163.705	39.759								68.5156	181.548	798.795	232.048	123.042									532.738
97.2115	41.358	156.799	163.855	69.8795								68.5156	250.298	399.398	231.807	123.042									478.571
97.2115	46.5278	156.799	163.705	40.9639								84.3269	333.73	399.398	231.807	123.042									314.286
97.3077	48.5507	137.199	163.705	40.9639								109.5	333.73	399.398	193.173	123.042									314.286
97.3077	42.9487	121.954	142.513	40.9639								134.821	126.984	398.795	193.173	114.974									264.881
97.3077	38.5057	121.954	142.513	40.9639								117.812	371.429	398.795	193.173	135.663									529.762
84.4167	38.4647	121.954	142.513	40.9639								108.25	278.571	398.795	138.956	163.855									844.048
74.4853	46.5278	116.416	187.091	40.9639								90.2083	278.571	398.795	138.956	89.3757									207.54
74.4853	51.0652	116.416	138.019	73.494								83.3654	278.571	398.795	138.956	109.237									133.73
79.1406	234.821	133.046	130.602	73.494								117.812	557.143	398.795	138.956	109.237									155.655
70.3472	454.762	155.02	150.12	73.494								98.5227	116.667	182.651	138.956	100.134									370.238
66.7105	267.063	155.02	142.497	146.988								83.3654	116.667	182.651	125.06	98.4337									185.119
66.6447	400.595	155.02	111.962	146.988								83.3654	102.381	182.651	178.657	98.4337									148.333
66.7105	96.8615	155.02	101.883	148.193								83.3654	93.0736	152.209	156.325	98.4337									154.524
70.4167	67.3669	155.02	108.675	137.349								83.2692	63.9881	152.209	110.241	109.371									193.155
70.4167	67.9315	155.02	120.575	138.554								83.3654	63.9881	130.637	102.892	109.371									642.857
70.4861	83.6081	155.02	125.394	138.554								90.3125	85.3175	130.637	102.892	98.4337									642.857
66.7763	83.6081	155.02	116.437	138.554								58.75	56.7669	101.473	125.402	89.3757									69.0476
66.7763	77.6361	308.032	122.651	138.554								235.625	51.3605	91.3253	150.482	98.3133									532.738
66.7763	98.8095	308.032	122.651	138.554								942.5	49.026	101.473	150.482	98.3133									314.286
60.4167	93.254	308.032	114.985	138.554								434.375	56.8296	114.157	136.802	98.3133									314.286
66.8421	101.732	308.032	114.91	138.554								314.583	56.8296	130.465	115.755	109.237									264.881
66.8421	101.786	355.422	114.985	138.554								157.292	56.7669	101.606	89.4244	96.6533									264.881
66.8421	92.2078	250.602	114.985	138.554								81.6667	53.9286	91.4458	94.6846	89.4852									311.31
70.5556	112.698	334.137	131.411	138.554								75.3846	53.9286	114.307	136.911	89.4852									124.524
70.5556	93.006	308.032	175.559	138.554								75.3846	49.026	110.994	123.818	89.4852									155.655
66.9079	131.19	128.916	175.559	138.554								75.3846	46.8944	110.994	131.325	98.4337									584.524
66.9079	185	143.24	245.783	138.554								75.3846	63.4454	49.7262	164.157	89.4852									554.167
70.625	128.72	184.165	245.783	137.349								75.4808	71.9048	43.0592	131.325	98.4337									523.81
70.625	126.786	117.196	299.197	137.349								75.4808	71.9048	52.8112	131.325	89.759									370.238
70.625	117.177	117.196	357.43	137.349								75.4808	59.9206	73.996	119.387	509.639									185.119
70.625	69.898	107.43	357.43	138.554								65.3333	59.9206	110.994	109.438	521.687									152.857
74.7794	89.7817	85.9438	357.43	138.554								65.3333	67.1131	111.145	116.033	521.687									84.9206
74.8529	89.7817	92.0826	357.43	138.554								65.3333	77.1429	111.145	107.745	173.896									173.81
74.8529	85.6151	92.0826	214.458	138.554								65.3333	128.571	98.6613	83.8019	173.896									642.857
74.8529	114.153	85.9438	214.458	138.554								65.3333	82.1429	98.6613	73.6087	394.578									245.238
74.8529	128.571	80.5723	148.193	138.554								65.4167	164.286	110.994	73.6087	260.843									152.381
74.9265	116.27	85.9438	148.193	138.554								63.6719	761.905	210.241	73.6087	197.349									314.881
74.9265	104.643	85.9438	148.193	138.554								63.6719	860.714	110.994	78.2037	197.108									150
97.9808	94.2857	85.9438	148.193	138.554								63.6719	255.357	398.795	90.4323	197.108									150
164.107	260.417	80.5723	148.193	138.554								63.6719	191.071	210.241	102.49	197.349									185.714
297.5	153.81	80.5723	148.193	138.554								63.6719	191.071	210.241	107.831	197.349									199.524
87.9464	128.175	80.6476	148.193	137.349								63.5938	255.357	140.161	107.831	140.964									141.667
94.7115	110	80.5723	149.398	137.349								63.5938	163.095	168.193	143.775	140.792									1108.33
94.7115	247.917	75.8327	448.193	137.349								63.6719	127.579	168.193	156.846	164.257									554.167
88.0357	495.833	75.8327	357.43	138.554								63.6719	112.5	140.161	132.715	197.108									356.548
82.1667	451.19	80.5723	634.94	138.554								63.6719	112.5	140.361	143.775	246.386									523.81
88.0357	451.19	80.5723	415.663	138.554								63.6719	112.5	168.193	301.446	246.386									190.476
88.0357	451.19	80.5723	415.663	138.554								63.6719	100.132	168.193	301.446	246.386									254.762
94.7115	451.19	80.5723	415.663	138.554								63.6719	108.929	168.193	261.145	197.108									191.071
102.708	58.1633	75.8327	415.663	137.349								63.6719	121.032	210.241	261.145	197.108									170.635
94.8077	58.1633	71.6198	415.663	137.349								63.5938	108.81	210.241	261.145	197.108									347.619
88.0357	42.8571	59.5838	415.06	142.169								65.3333	98.9177	210.241	301.446	197.108									138.095
87.9464	40.7143	61.3884	195.181	142.169								63.5938	98.9177	210.241	376.807	246.386									410.714
88.0357	40.7143	64.4578	195.181	71.0843								63.5938	98.9177	210.241	348.193	197.108									207.54
88.0357	44.4099	71.6198	148.795	101.205								67.8333	120.899	210.241	377.108	179.217									220.238
114.625	41.358	75.8327	233.434	101.205								68.4375	384.524	210.241	377.108	196.867									308.333
127.361	41.358	75.8327	233.133	140.964								68.4375	95.6349	210.241	497.59	196.867									356.548
223.75	41.4021	75.9036	233.133	70.4819								68.4375	108.81	280.321	497.59	196.867									523.81
103.929	41.4021	75.9036	200	70.4819								68.4375	87.7289	210.241	497.59	246.084									25
101.875	42.9945	75.8327	250.301	40.9639								68.4375	87.7289	800	497.59	328.112									336.111
101.875	39.881	75.8327	250	40.9639								68.4375	63.955	798.795	754.217	246.084									126.042
101.875	39.881	155.02	250	40.9639								68.5156	73.4694	798.795	1092.77	226.104									201.667
97.2115	39.881	75.8327	250	40.9639								68.5156	64.3601	399.398	1092.77	202.008									207.54
97.2115	39.881	220.482	200	40.9639								73.0833	85.8974	798.795	1092.77	161.446									183.532
97.3077	46.5278	232.53	142.685	40.9639								84.2308	85.1852	797.59	1095.18	161.446									275.298
97.3077	42.9487	186.024	142.857	40.9639								111.094	200.238	265.863	1095.18	140.361									713.095
97.3077	42.9487	186.265	142.685	73.494								296.25	333.73	398.795	273.795	120.31									422.024
97.3077	41.358	133.046	142.685	73.494								444.375	333.73	398.795	231.807	160.482									336.111
70.2778	42.7536	137.199	166.466	146.988								104.722	975	398.795	232.048	200.904									201.667
70.2778	49.1667	137.199	142.685	146.988								94.25	538.095	398.795	231.807	160.723									281.349
70.2778	74.6337	137.199	145.515	146.988								90.3125	222.857	398.795	231.807	105.422									139.286
70.3472	156.548	156.799	145.515	146.988								77.4107	222.857	220.482	231.807	105.422									472.619
70.3472	227.381	109.759	163.705	137.349								77.3214	278.571	398.795	289.759	105.422									308.333
70.3472	628.571	121.954	163.705	137.349								83.2692	278.571	182.651	289.759	120.482									157.313
70.3472	369.048	137.048	145.515	137.349								98.4091	371.429	182.651	193.173	120.482									317.46
70.4167	626.19	137.048	145.515	137.349								98	374.206	152.209	138.956	120.482									1088.1
74.5588	516.667	155.02	145.515	138.554								94.25	56.8783	152.209	138.956	105.422									713.095
70.4167	147.619	186.024	124.699	138.554								83.3654	56.8783	152.209	138.956	93.7082									281.349
70.4861	84.3537	232.53	142.513	138.554								83.2692	60.2241	152.209	138.956	120.482									281.349
70.4861	90.8425	186.024	142.685	138.554								83.2692	56.7669	152.209	125.06	200.904									252.083
66.7763	236.19	186.024	145.515	138.554								83.2692	53.9286	130.465	113.691	160.723									247.619
66.7763	393.651	186.024	130.723	138.554								83.2692	59.9206	114.157	138.956	200.904									910.714
60.4167	213.095	155.02	130.622	138.554								98.5227	56.7669	101.473	125.06	133.936									289.683
66.8421	60.213	155.02	120.575	138.554								98.5227	59.9206	114.157	102.892	98.4337									225
66.8421	72.5397	155.02	87.0817	138.554								235.938	59.9206	130.465	86.747	109.371									225
66.8421	84.9206	155.02	92.0482	138.554								157.292	53.9286	130.465	86.747	123.042									50
66.8421	95.2381	155.02	101.883	138.554								134.821	51.4172	114.307	96.4608	140.62									100
66.8421	76.1905	308.434	101.883	138.554								75.3846	51.4172	114.307	115.755	140.62									869.048
66.9079	90.4762	355.422	95.8894	138.554								75.3846	51.3605	168.193	125.402	109.371									205.952
66.9079	98.8095	232.53	102.209	138.554								75.3846	51.3605	238.956	115.755	109.237									50
66.9079	101.786	355.422	114.985	137.349								75.3846	44.9405	95.0602	115.755	122.892									42.8571
70.625	113.095	185.06	122.651	137.349								75.3846	44.9405	79.2169	88.5897	122.892									833.333
70.625	115.774	308.032	91.9277	138.554								75.4808	49.026	88.9157	89.4244	140.448									507.143
70.6944	117.619	462.048	96.766	138.554								75.4808	82.967	73.996	91.5663	128.744									866.667
74.8529	91.6667	302.711	114.91	138.554								70	89.881	111.145	91.5663	98.4337									807.143
74.8529	154.167	172.978	114.985	138.554								70	77.2894	98.7952	103.012	89.4852									433.333
74.8529	114.418	143.24	100.861	138.554								65.3333	55.8862	88.9157	137.349	98.4337									433.333
74.8529	105.423	143.24	224.498	138.554								65.3333	77.381	98.6613	126.784	98.4337									288.889
74.8529	79.0675	128.916	204.819	138.554								65.3333	258.333	98.6613	109.88	98.4337									1116.67
74.9265	61.1607	138.822	204.819	138.554								65.4167	179.464	110.994	103.012	98.4337									351.19
74.9265	104.643	92.0826	175.559	138.554								65.3333	239.286	98.6613	107.745	98.4337									108.73
91.9231	87.2024	85.9438	245.783	137.349								63.6719	164.286	210.241	113.691	98.3133									80.9524
121.528	80.5861	85.9438	863.855	137.349								63.6719	189.583	357.831	94.2771	98.3133									163.69
297.5	93.3983	85.9438	268.072	137.349								63.6719	113.244	238.554	81.357	89.3757									147.619
87.9464	205.714	77.1084	267.771	137.349								65.3333	100.476	286.747	71.7129	89.3757									203.968
82.0833	153.571	77.1084	268.072	138.554								63.5938	767.857	210.241	74.9726	89.3757									305.952
76.9531	153.571	85.9438	357.43	138.554								63.5938	488.69	168.193	71.7129	89.3757									611.905
76.9531	242.46	85.9438	357.43	138.554								63.5938	823.81	168.193	71.7129	89.4852									147.619
76.9531	192.262	85.9438	214.458	138.554								63.6719	825	168.193	82.4699	89.4852									452.381
77.0312	192.262	85.9438	214.458	138.554								63.6719	254.762	168.193	104.819	89.4852									608.333
77.0312	153.81	80.5723	148.193	142.169								63.6719	379.167	140.161	115.02	98.4337									640.476
82.1667	218.095	80.5723	148.193	142.169								63.6719	758.333	140.161	123.236	89.4852									641.667
87.9464	218.095	80.5723	148.193	140.964								63.6719	326.19	124.613	156.846	98.4337									271.429
87.9464	495.833	80.5723	148.193	70.4819								63.6719	104.437	124.613	143.775	169.578									271.429
87.9464	451.19	75.8327	148.193	70.4819								63.6719	47.9167	168.193	132.715	197.59									614.286
88.0357	451.19	75.8327	148.193	70.4819								63.5938	49.9482	210.241	123.236	197.59									136.31
82.0833	451.19	80.5723	148.193	70.4819								63.5938	57.8869	210.241	301.446	359.639									136.31
82.1667	451.19	80.5723	148.193	40.9639								67.8333	90.119	210.241	301.446	359.639									136.31
88.0357	90	80.5723	359.036	40.9639								68.4375	128.741	210.241	301.446	173.896									136.31
87.9464	38.7755	71.6198	415.663	40.9639								68.4375	161.905	210.241	301.446	179.518									770.238
87.9464	37.013	75.8327	415.663	40.9639								68.4375	127.579	210.241	301.446	179.518									673.81
88.0357	40.7143	71.6198	415.663	40.9639								68.4375	98.9177	210.241	376.807	239.357									367.46
223.75	35.4037	71.6198	276.707	40.9639								68.4375	108.81	210.241	376.807	246.687									672.619
223.75	35.4037	71.6198	276.707	40.9639								68.4375	112.649	210.241	376.807	246.687									220.238
141.25	44.619	71.6198	276.707	146.988								68.4375	100.132	280.321	376.807	197.349									220.238
103.929	42.8571	75.8327	233.133	146.988								68.4375	108.929	210.542	376.807	164.458									684.524
101.875	41.3139	75.8327	233.133	137.349								68.5156	121.032	210.542	497.59	197.349									296.825
94.0385	41.3139	75.9036	186.747	137.349								68.5156	120.899	800	497.59	164.458									205.556
101.875	41.358	75.9036	186.747	137.349								78.3036	108.81	800	497.59	140.964									595.238
97.2115	39.881	75.9036	186.747	137.349								91.25	120.899	800	502.811	140.964									110.119
90.3571	41.358	75.8327	166.867	137.349								177.75	114.167	798.795	502.811	158.072									308.333
84.3333	39.881	75.9036	202.926	138.554								163.333	181.349	798.795	1092.77	240.964									167.381
90.3571	39.881	132.874	143.029	138.554								296.25	257.54	220.482	1092.77	226.104									308.333
97.3077	38.5057	931.325	200.241	138.554								77.4107	128.175	220.482	1092.77	246.386									94.0476
97.3077	38.5057	113.855	200.241	138.554								72.25	103.68	266.265	365.06	481.928									273.81
97.3077	41.358	113.855	250.301	138.554								72.25	76.0317	266.265	365.06	246.386									229.167
79.0625	46.5278	120.482	250.301	138.554								77.4107	60.0251	265.863	547.59	197.108									229.167
79.0625	55.8333	120.482	250	138.554								77.4107	63.3598	398.795	1095.18	164.257									152.778
70.2778	57.7731	232.53	142.857	138.554								77.3214	81.4626	398.795	365.06	197.108									229.167
70.3472	46.8254	155.221	142.857	138.554								83.2692	101.786	220.181	289.759	246.386									184.524
70.3472	51.7544	186.265	136.596	138.554								90.2083	64.3601	182.651	231.807	197.108									595.238
70.3472	202.976	133.046	142.857	138.554								134.643	79.7619	182.651	231.807	179.217									184.524
70.3472	326.19	137.199	166.667	138.554								117.812	85.0529	182.651	231.807	179.217									184.524
74.4853	114.683	137.199	166.667	138.554								90.3125	95.8333	152.209	386.345	179.217									184.524
76.4062	163.889	137.199	124.849	138.554								83.3654	200.238	152.209	231.807	140.62									535.714
74.6324	90.2015	137.199	145.649	138.554								83.2692	97.8355	152.209	231.807	226.104									267.857
70.4861	458.929	156.799	163.855	138.554								83.2692	139.286	152.209	289.759	328.112									70.2381
70.4861	372.024	156.627	163.705	138.554								83.2692	679.762	152.209	165.577	196.867									70.2381
70.4861	630.952	137.048	145.515	138.554								83.2692	358.73	130.465	165.577	226.104									591.667
66.8421	938.095	121.821	145.515	138.554								83.3654	185.714	130.637	138.956	200.301									295.833
66.8421	251.488	137.048	145.515	138.554								83.3654	222.857	130.637	138.956	151.506									42.8571
66.8421	502.976	156.627	145.515	138.554								163.333	278.571	91.3253	138.956	202.008									42.8571
66.8421	502.976	186.024	124.849	138.554								157.292	278.571	101.473	140.307	120.31									70.2381
66.8421	265.476	232.53	163.705	138.554								104.861	371.429	114.307	118.721	105.271									70.2381
66.8421	107.359	232.53	145.515	138.554								104.861	557.143	152.209	113.691	160.482									70.2381
66.8421	40.7225	232.53	142.607	137.349								75.3846	750	152.209	125.06	105.422									497.619
66.9079	38.0952	232.53	130.622	137.349								75.3846	56.8783	127.229	102.892	105.422									591.667
66.9079	38.0952	186.024	104.498	137.349								75.3846	56.7669	150	86.747	105.422									162.5
66.9079	56.2358	155.02	92.2041	138.554								75.3846	56.8783	83.1325	86.747	93.7082									162.5
70.6944	69.4678	155.02	96.8928	138.554								70	53.9286	91.3253	91.4993	105.422									42.8571
70.6944	147.619	155.02	108.292	138.554								65.4167	53.9286	98.7952	96.4608	140.562									70.2381
70.6944	59.0476	155.02	87.6649	138.554								70.0893	51.3605	88.9157	107.487	120.482									70.2381
70.6944	60.1504	132.874	85.7958	138.554								70.0893	51.3605	80.8324	125.402	120.482									42.8571
70.6944	81.6327	132.874	95.8894	140.964								65.3333	56.7669	80.8324	115.755	105.422									167.46
74.8529	71.4286	446.988	101.883	70.4819								65.3333	59.9206	88.9157	88.5897	93.7082									162.5
74.8529	71.4286	223.494	108.221	70.4819								65.3333	53.9286	98.6613	82.3494	105.422									70.2381
74.8529	81.6327	223.494	76.6064	70.4819								65.3333	51.3605	98.6613	86.747	105.422									42.8571
122.625	90.4762	308.434	76.6064	70.4819								65.4167	49.0801	110.994	86.747	133.936									42.8571
240	101.786	201.807	108.15	70.4819								63.6719	46.8944	98.6613	86.747	200.904									123.81
620	113.095	172.978	141.427	40.9639								63.6719	41.4835	98.6613	103.012	140.448									123.81
102.604	127.232	129.036	128.368	40.9639								63.6719	41.4835	280.723	103.012	109.237									204.762
94.7115	127.083	129.036	156.894	40.9639								63.6719	41.4835	98.6613	86.747	98.4337									204.762
82.0833	88.4921	117.306	141.205	40.9639								65.3333	44.9405	398.795	82.4096	109.371									143.254
76.9531	90.4762	107.53	141.205	40.9639								65.3333	258.333	398.795	86.747	123.042									204.762
76.9531	114.418	107.43	168.373	40.9639								65.3333	58.7912	286.747	96.5361	123.042									246.429
76.9531	74.6599	104.116	204.819	40.9639								63.5938	48.539	286.747	90.8575	89.4852									246.429
76.9531	65.3274	85.9438	932.53	39.759								63.5938	39.3268	210.241	77.2892	98.4337									246.429
77.0312	74.6599	80.5723	214.217	137.349								63.5938	45.619	210.241	71.7129	114.974									288.095
82.1667	104.524	80.5723	214.217	137.349								63.6719	323.81	168.193	74.9726	114.974									288.095
82.0833	163.81	77.1084	214.217	138.554								63.6719	166.27	139.96	68.7249	140.448									426.19
82.0833	80.4945	77.1084	214.217	138.554								63.6719	140.476	140.161	68.7249	180.241									852.381
82.0833	71.9048	85.9438	214.217	138.554								65.3333	263.889	140.161	71.7129	109.371									852.381
82.0833	93.5065	85.9438	214.458	138.554								65.3333	58.7093	124.613	88.7314	98.4337									317.857
82.1667	128.571	85.9438	214.458	138.554								65.3333	61.9709	145.382	110.077	98.4337									852.381
82.1667	97.0238	85.9438	148.193	138.554								61.8382	76.8315	145.382	211.188	98.4337									852.381
82.1667	78.869	85.9438	148.193	138.554								64.4118	262.698	210.241	183.802	98.4337									852.381
82.1667	145.918	80.5723	148.193	138.554								68.4375	411.905	210.241	143.775	98.4337									852.381
82.1667	479.762	80.5723	148.193	138.554								68.4375	411.905	210.241	132.715	98.4337									852.381
87.9464	192.262	80.5723	148.193	138.554								68.4375	412.5	210.241	123.236	98.4337									276.19
88.0357	192.262	71.6198	148.193	138.554								68.4375	825	210.241	301.446	89.4852									276.19
88.0357	192.262	75.8327	148.193	138.554								68.4375	225	210.241	301.446	89.4852									108.333
88.0357	192.262	75.8327	148.193	138.554								68.4375	254.762	210.241	251.205	89.3757									211.31
165.25	218.095	80.5723	148.193	137.349								68.4375	1082.14	210.241	251.205	89.3757									276.19
148.438	150.397	80.5723	148.193	137.349								68.4375	180.357	280.723	251.205	89.3757									164.881
593.75	451.19	75.8327	197.59	138.554								73	60.4637	280.723	251.205	89.3757									70.2381
244.75	451.19	80.5723	634.94	138.554								78.2143	52.2727	210.542	301.446	89.4852									151.984
101.875	451.19	75.8327	415.06	138.554								109.5	46	210.542	301.446	89.4852									276.19
94.0385	225.595	71.6198	276.707	138.554								222.188	54.7052	280.723	376.807	89.4852									325.397
94.0385	173.81	71.6198	276.707	138.554								444.375	88.7363	280.723	376.807	89.4852									164.881
94.0385	37.013	71.6198	276.707	138.554								75.2885	90.119	800	376.807	89.4852									179.762
90.2679	37.013	75.8327	233.133	138.554								75.2885	128.741	800	376.807	169.578									410.714
78.9844	35.4037	75.8327	233.434	138.554								72.25	127.579	800	376.807	837.349
78.9844	49.8512	75.9036	186.747	138.554								72.25	123.363	798.795	376.807	197.59
74.3382	42.5595	75.9036	186.747	137.349								72.25	83.6996	399.398	376.807	197.59
74.3382	41.3139	75.9036	186.747	137.349								77.4107	98.9177	266.265	497.59	521.687
74.3382	41.3139	75.8327	155.622	137.349								77.4107	108.81	266.265	547.59	179.518
78.9844	42.9029	75.9036	177.56	137.349								77.4107	120.899	266.265	289.759	197.349
79.0625	42.9029	75.9036	177.56	138.554								83.2692	108.81	220.482	289.759	197.349
79.0625	41.3139	132.874	177.56	138.554								90.2083	121.032	220.482	289.759	246.687
74.4853	37.2222	75.9036	166.867	138.554								90.2083	108.929	220.482	289.759	246.687
70.3472	38.5057	931.325	200.241	138.554								98.4091	108.81	293.976	289.759	246.687
70.3472	38.5057	931.325	250.301	140.964								83.3654	103.788	220.482	336.546	164.458
70.3472	38.5057	465.663	250.301	70.4819								90.3125	87.8205	182.892	386.345	140.964
74.4853	38.5057	113.855	200	70.4819								83.3654	114.048	182.651	289.759	140.964
95	39.881	113.855	142.857	40.9639								83.2692	103.788	182.651	231.807	140.964
76.4062	39.881	465.06	136.596	71.0843								83.2692	103.788	152.209	231.807	164.458
71.9118	90.4762	310.04	136.596	71.0843								83.2692	76.0317	152.209	193.173	197.349
70.4861	60.3175	310.04	142.857	70.4819								83.3654	63.3598	152.209	193.173	158.072
70.4861	54.5635	232.831	166.667	71.0843								83.3654	57.0238	152.209	224.578	263.454
70.4861	42.9487	232.831	142.857	70.4819								83.3654	63.3598	152.209	187.149	395.181
70.5556	39.3333	232.831	142.857	71.0843								83.3654	90.6746	130.465	139.09	362.651
70.5556	114.048	232.831	142.857	70.4819								89.2045	109.354	130.809	139.09	197.108
70.5556	263.095	137.199	163.855	39.759								89.2045	85.8135	114.458	139.09	123.193
70.5556	202.857	137.199	163.705	69.8795								104.861	93.6147	52.5048	128.614	164.257
66.8421	86.4796	156.799	145.515	69.8795								81.6667	85.0529	101.606	118.721	246.386
66.8421	67.2619	155.221	145.515	69.8795								75.3846	85.1852	114.307	110.241	263.052
66.9079	63.7218	156.627	145.515	30.1205								75.3846	83.8095	130.637	110.241	197.108
66.9079	119.312	156.627	145.515	69.8795								75.3846	243.75	130.637	125.402	179.217
66.9079	168.333	137.048	130.964	69.8795								70	162.5	130.637	110.327	179.217
66.9079	150.68	137.048	163.705	137.349								65.4167	243.75	130.637	96.5361	179.217
70.6944	95.8874	156.627	145.515	138.554								65.4167	139.286	76.2048	90.8575	226.104
66.9737	141.27	232.53	145.515	138.554								65.4167	185.714	76.1044	90.8575	226.104
70.6944	96.5368	232.53	142.497	138.554								65.3333	222.857	91.3253	85.8099	339.157
70.6944	58.9881	232.53	120.575	138.554								65.3333	222.857	98.7952	85.8099	339.157
70.6944	96.5368	232.53	104.498	138.554								65.3333	222.857	74.0964	85.8099	196.867
70.6944	151.701	186.024	104.498	138.554								65.3333	185.714	74.0964	85.8099	164.056
74.8529	151.701	186.024	87.6649	138.554								65.3333	371.429	88.9157	81.2936	151.506
90.8929	62.1554	155.02	87.6649	138.554								65.3333	557.143	98.6613	82.4096	140.161
143.438	47.2381	155.02	87.6649	138.554								63.5938	51.3039	98.6613	86.747	120.138
170	36.9048	155.02	90.5622	138.554								65.3333	51.3039	98.6613	82.4096	168.675
112.045	38.0952	186.024	114.985	138.554								65.3333	53.8847	98.6613	77.0037	105.422
87.9464	40.7225	132.702	102.142	138.554								65.3333	53.8847	98.6613	77.0037	105.422
82.0833	62.1554	132.702	76.6064	137.349								65.3333	51.3605	110.994	88.5542	84.3373
82.0833	131.217	132.702	76.6064	137.349								65.3333	51.3605	927.711	84.3373	84.3373
76.9531	212.698	154.819	96.766	138.554								65.3333	51.3605	573.494	80.5038	84.3373
76.9531	131.217	232.53	131.325	138.554								65.3333	51.3605	398.795	80.5038	140.562
76.9531	65.6085	462.048	122.57	138.554								65.3333	53.9286	398.795	82.4096	105.422
76.9531	63.4921	231.024	122.57	138.554								65.25	49.026	238.554	78.4854	120.482
76.9531	71.4286	202.008	131.325	138.554								65.3333	49.026	142.57	80.5038	105.422
77.0312	76.1905	201.807	141.427	138.554								63.6719	46.8944	140.161	80.5038	93.7082
76.9531	71.4286	172.978	117.671	138.554								65.3333	46.8944	140.161	84.3373	93.7082
82.0833	87.9121	129.036	163.554	138.554								65.3333	39.9471	140.161	70.8434	93.7082
82.0833	83.5165	107.53	310.843	138.554								65.3333	35.9524	168.193	65.5957	122.892
82.0833	83.5165	107.53	357.028	137.349								65.3333	56.7669	145.382	63.4384	122.892
82.0833	101.786	86.0241	214.217	137.349								61.8382	51.3605	145.382	65.9759	122.892
82.1667	92.5325	86.0241	214.217	137.349								57.6316	127.778	210.241	82.4699	109.237
82.1667	127.232	85.9438	214.217	137.349								73	75.5952	210.241	101.291	109.237
82.1667	145.408	80.5723	214.217	138.554								68.4375	84.7985	210.241	123.111	123.042
82.1667	95.0893	80.5723	214.217	138.554								68.4375	248.016	210.241	132.715	123.042
82.0833	80.4029	80.5723	214.217	138.554								68.4375	421.429	210.241	132.715	89.4852
87.9464	69.6825	77.1084	147.892	40.9639								68.4375	97.8571	210.241	156.846	89.4852
87.9464	65.3274	77.1084	148.193	71.0843								68.4375	41.3139	210.241	251.406	89.4852
88.0357	69.6825	85.9438	148.193	71.0843								68.4375	41.3139	210.542	251.205	123.042
104.318	104.524	85.9438	148.193	71.0843								68.4375	54.4643	280.723	251.205	114.974
94.8077	205.06	85.9438	148.193	142.169								73	49.513	280.723	251.205	114.974
152.5	93.0556	85.9438	148.193	140.964								92.3864	47.3602	280.723	251.205	113.012
244.75	85.8974	85.9438	148.193	70.4819								218.333	52.2727	280.723	251.205	196.627
118.75	102.857	85.9438	148.193	70.4819								655	57.5	186.506	251.205	98.4337
174.821	114.286	80.497	148.193	70.4819								85.6818	59.2105	280.321	301.446	109.371
101.875	116.22	80.497	148.193	70.4819								65.25	47.8671	280.321	301.446	89.4852
94.0385	163.095	58.5433	148.193	70.4819								72.25	49.9482	801.205	301.446	98.4337
94.0385	145.918	80.5723	296.386	139.759								72.25	60.4637	800	301.446	109.371
78.9844	170.238	80.5723	634.94	139.759								72.25	63.8228	800	376.807	123.042
79.0625	134.524	80.5723	634.94	69.2771								72.25	63.8228	800	376.807	89.4852
78.9844	153.81	80.5723	276.707	69.8795								72.25	47.8671	798.795	376.807	89.4852
66.5132	153.81	80.497	233.133	69.8795								72.25	52.2186	266.265	376.807	89.4852
63.1875	192.262	75.8327	233.133	139.759								72.25	46	266.265	502.41	89.4852
70.2083	192.262	71.6198	233.133	137.349								72.25	47.9167	266.265	502.41	89.3757
74.3382	256.349	71.6198	233.133	138.554								72.1667	57.4405	266.265	502.41	89.3757
74.3382	192.262	75.8327	233.434	138.554								83.2692	100.132	220.482	251.406	89.3757
79.0625	159.921	75.8327	186.747	138.554								83.2692	128.912	220.482	386.345	86.988
79.1406	225.595	75.8327	186.747	138.554								83.2692	127.778	220.482	289.759	89.4852
79.1406	200.595	67.8503	193.287	138.554								83.3654	127.579	220.482	289.759	89.4852
74.4853	184.524	75.9036	193.287	137.349								83.3654	158.929	220.482	289.759	89.4852
74.4853	135.417	75.9036	143.029	137.349								83.2692	120.899	220.482	289.759	98.4337
84.4167	38.7755	75.8327	143.029	138.554								83.2692	108.81	182.651	336.546	169.578
103.636	38.7755	75.8327	177.56	138.554								83.2692	98.9177	152.209	336.948	418.675
103.636	38.7755	75.9036	143.029	138.554								83.2692	90.6746	182.651	290.06	418.675
81.4286	41.619	75.9036	166.867	138.554								83.3654	99.026	91.3253	232.048	418.675
76.3281	44.619	75.9036	250.301	138.554								83.3654	95.2381	182.651	232.048	360.241
70.4861	41.3139	308.032	200	138.554								83.3654	114.167	152.209	193.373	263.454
70.4861	41.3139	931.325	142.857	138.554								94.25	95.0397	182.651	178.83	197.349
70.4861	42.9029	120.482	142.857	138.554								83.3654	76.0317	283.735	156.476	164.458
70.5556	39.8384	113.855	136.596	69.2771								122.656	114.048	152.41	156.476	246.687
70.5556	35.9831	113.855	142.857	138.554								81.7708	103.68	130.637	139.09	246.687
70.5556	35.9831	465.06	142.857	138.554								94.25	76.0317	114.307	139.09	197.349
70.5556	38.5057	310.04	142.857	138.554								75.3846	67.0868	91.4458	154.337	183.534
66.9079	37.2222	310.04	142.857	137.349								75.3846	63.2937	130.637	154.337	493.373
66.9079	39.2857	232.53	142.857	137.349								75.3846	76.0317	130.637	118.721	197.349
66.9079	36.0215	232.831	131.084	137.349								75.3846	91.8651	130.637	102.892	164.458
70.625	38.5057	232.831	130.964	138.554								65.3333	104.881	130.637	102.892	197.59
70.625	41.358	169.88	145.515	138.554								65.3333	114.762	130.637	102.892	164.458
70.6944	217.143	254.819	145.515	138.554								65.4167	127.579	76.2048	110.327	123.343
66.9737	190.238	156.799	130.964	138.554								65.3333	95.6845	91.3253	102.972	123.343
66.9737	237.798	156.799	145.515	138.554								65.8594	107.407	127.022	96.5361	123.343
70.6944	120.04	156.627	145.515	138.554								65.8594	127.778	111.145	90.8575	131.727
70.6944	102.891	137.048	145.515	138.554								65.3333	209.524	111.145	85.8099	395.181
70.6944	323.214	156.627	137.47	138.554								65.3333	217.262	111.145	85.8099	395.181
70.6944	155.952	156.627	137.47	137.349								65.3333	434.524	98.7952	81.2936	246.386
70.6944	215.476	156.627	152.61	137.349								65.3333	179.563	98.6613	85.8099	140.792
79.5833	74.8512	155.02	163.705	137.349								65.3333	159.354	98.6613	85.8099	98.5542
191.25	57.6531	186.024	120.575	137.349								65.3333	159.184	98.6613	81.2936	123.193
163.929	46.5659	232.53	120.575	138.554								65.3333	222.857	98.6613	81.2936	246.386
102.708	44.8413	186.024	111.962	138.554								65.3333	222.857	98.6613	81.2936	246.386
94.8077	44.8413	186.024	97.9669	140.964								65.3333	185.714	98.7952	78.4854	197.108
88.0357	38.0184	186.024	87.6649	140.964								72.5962	222.857	111.145	77.0037	197.108
82.0833	35.7143	155.02	92.0482	70.4819								65.3333	222.857	280.321	77.0037	197.108
82.0833	40.6404	132.874	85.7958	70.4819								65.3333	222.857	398.795	77.0037	246.084
76.9531	39.2857	132.874	91.988	70.4819								65.3333	278.571	398.795	80.5038	226.104
76.9531	33.7075	132.874	87.5502	70.4819								65.3333	169.345	238.554	80.5038	226.104
76.9531	40.6814	132.874	83.5706	70.4819								65.3333	278.274	171.084	80.5038	481.928
76.9531	39.3254	132.702	79.9371	70.4819								65.3333	278.274	140.161	77.0037	481.928
72.4265	39.3254	132.702	83.5706	140.964								65.3333	222.619	140.161	73.7952	140.62
72.5	38.0952	132.874	96.766	139.759								65.3333	222.619	168.193	73.7952	123.042
77.0312	39.3651	132.874	102.142	28.9157								65.3333	191.667	140.161	73.7952	140.62
76.9531	38.0952	155.02	108.15	28.9157								65.3333	55.5322	124.613	73.7952	123.042
82.0833	36.9048	354.819	108.15	138.554								68.4375	123.98	145.382	68.1186	109.371
82.0833	38.0952	477.108	114.91	138.554								73	54.7619	210.241	65.5957	120.31
82.0833	56.2358	232.53	108.15	138.554								73	53.869	210.241	63.392	93.5743
82.1667	98.4127	308.032	114.91	138.554								73	56.7043	210.241	65.9759	84.3373
82.1667	90.8425	173.15	150.241	138.554								73	54.4974	210.241	68.7249	84.3373
82.1667	102.165	173.15	317.47	138.554								68.4375	51.3605	210.542	103.087	84.3373
82.1667	155.272	173.15	148.193	138.554								68.4375	51.3605	210.542	101.291	93.7082
82.0833	181.151	161.295	214.217	138.554								68.4375	51.3605	210.241	101.291	105.422
82.0833	87.9121	129.036	214.217	138.554								68.4375	51.3605	210.241	118.158	93.7082
87.9464	71.4286	99.2586	306.225	138.554								68.4375	49.026	210.241	169.277	121.687
94.8077	67.2269	86.0241	214.217	137.349								68.4375	49.026	280.321	496.386	161.747
94.8077	67.2269	86.0241	214.217	137.349								78.2143	46.8944	280.321	251.406	133.936
95.3409	69.9735	80.5723	214.217	138.554								173.75	49.026	280.321	251.406	98.4337
94.8077	69.9735	75.8327	148.193	138.554								94.25	56.7669	280.321	251.406	81.9277
135.972	77.6361	80.5723	147.892	138.554								70	57.8704	280.321	251.406	89.3757
101.979	92.5325	80.5723	147.892	138.554								66.3971	44.9405	280.321	251.406	89.3757
101.979	87.6984	80.5723	148.193	138.554								67.6562	150.595	280.321	301.687	109.237
94.0385	101.786	80.5723	148.193	138.554								72.1667	120.833	280.321	251.205	109.237
94.0385	92.5325	85.9438	148.193	69.2771								72.1667	184.286	800	301.446	122.892
84.25	93.7229	85.9438	148.193	69.2771								72.1667	90.8333	798.795	301.446	122.892
74.3382	73.5544	80.5723	148.193	138.554								70.3906	60.5556	798.795	301.446	123.042
78.9844	72.0588	80.5723	148.193	138.554								70.4688	56.369	266.265	301.446	140.62
70.2083	65.3274	80.5723	197.59	137.349								66.3235	157.619	266.265	301.446	109.371
63.1875	74.6599	113.582	359.036	137.349								66.3235	64.0756	266.265	301.446	89.4852
60.1786	95.0216	138.688	195.181	137.349								67.6562	45.3869	266.265	301.446	123.042
70.2083	273.413	80.497	195.181	137.349								72.1667	47.3602	176.386	376.807	94.1767
74.3382	158.333	80.497	415.06	138.554								83.2692	54.4643	220.482	376.807	114.974
78.9844	95	80.497	233.133	138.554								83.2692	47.3602	220.482	376.807	98.3133
79.1406	98.9418	80.497	233.133	138.554								83.3654	45.3869	220.783	502.41	89.3757
79.1406	127.041	80.497	233.133	138.554								83.3654	47.9167	399.398	502.41	89.3757
84.4167	222.321	80.497	233.434	138.554								83.2692	50	176.145	502.41	89.4852
90.4464	163.095	80.497	233.434	138.554								83.2692	47.8671	114.006	336.546	89.4852
70.3472	172.619	80.497	233.434	138.554								98.4091	45.9524	91.2048	289.759	82.0281
103.636	127.679	75.7619	155.622	138.554								83.2692	49.9482	134.036	289.759	82.0281
103.636	127.679	71.6198	155.622	137.349								83.3654	45.9524	100.438	289.759	75.7183
126.667	145.918	71.6198	173.762	137.349								83.3654	49.9482	92.0683	386.345	89.4852
126.667	163.889	85.9438	173.896	137.349								83.3654	49.9482	152.209	386.747	82.0281
76.3281	256.349	80.5723	223.408	137.349								83.3654	44.185	220.181	290.06	89.4852
70.4861	260.119	75.8327	143.029	71.0843								186.25	52.2186	293.976	208.635	89.4852
70.4861	260.119	75.8327	143.029	71.0843								83.3654	46	130.637	208.635	89.4852
70.5556	256.349	75.8327	202.926	70.4819								981.25	46	130.637	208.635	81.9277
70.5556	160.317	75.9036	177.56	70.4819								94.25	54.7619	114.307	178.83	81.9277
70.5556	240.476	75.8327	142.857	70.4819								75.3846	255.556	114.307	156.476	89.3757
70.5556	166.667	75.8327	142.857	70.4819								75.3846	100.265	130.637	125.181	89.3757
70.625	159.921	75.9036	125	70.4819								75.3846	83.7912	130.637	137.021	89.4852
66.9079	159.921	75.9036	142.857	70.4819								75.3846	109.524	182.892	137.021	82.0281
74.7794	159.921	75.9036	142.857	140.964								75.3846	153.333	130.637	125.181	98.4337
70.1471	128.869	75.9036	142.857	140.964								65.3333	104.464	130.637	125.181	140.62
70.6944	183.333	155.02	125	139.759								65.4167	108.81	101.606	139.09	213.253
70.6944	183.929	113.855	125	109.639								65.4167	77.7211	130.637	125.181	286.747
70.6944	45.2381	107.229	142.857	109.639								65.8594	83.6996	358.434	102.892	246.687
66.9737	62.6374	269.88	145.649	138.554								65.8594	120.899	336.145	102.892	164.458
66.9737	57.9932	310.442	119.168	138.554								65.3333	114.167	177.831	102.892	140.964
66.9737	40.7143	310.442	130.964	138.554								65.3333	142.56	127.022	102.972	123.343
70.6944	44.5346	465.06	145.515	138.554								65.3333	114.048	111.145	102.972	197.349
66.9737	42.9029	310.442	124.973	138.554								65.3333	103.68	110.994	118.814	246.687
66.9737	42.9029	232.831	124.973	138.554								65.3333	114.048	286.747	96.5361	197.349
70.6944	41.3139	232.831	124.973	138.554								65.3333	103.68	715.663	90.8575	183.534
298.438	41.3139	227.711	124.973	138.554								65.3333	87.7289	357.831	102.972	267.47
131.094	37.1825	186.265	124.973	138.554								65.3333	76.0317	238.554	90.8575	263.052
94.8077	35.9831	156.627	114.558	138.554								65.3333	91.7659	142.57	85.8099	263.052
94.7115	35.9831	156.627	124.863	138.554								67.4107	100.216	140.161	85.8099	197.59
82.0833	37.1825	137.048	124.863	137.349								94.375	105	140.161	85.8099	158.072
82.0833	39.8384	156.627	145.515	137.349								72.5962	131.101	140.161	81.2936	140.964
82.0833	42.9487	156.627	137.349	137.349								65.3333	143.452	140.161	82.3494	140.964
76.9531	41.358	156.627	142.607	138.554								65.3333	109.354	168.193	78.428	140.964
76.9531	39.881	155.02	120.667	138.554								65.3333	148.81	210.241	78.4854	157.831
76.9531	53.1746	186.024	92.275	138.554								65.25	241.667	210.241	78.4854	197.289
76.9531	54.2857	186.024	87.1486	138.554								65.3333	152.778	210.241	73.7952	109.639
77.0312	146.429	155.02	82.5618	69.2771								65.3333	289.683	210.241	73.7952	109.639
77.0312	323.214	186.024	82.5618	138.554								65.3333	289.683	210.241	73.7952	89.5947
77.0312	107.738	186.024	96.766	138.554								65.3333	434.524	210.241	80.5038	123.193
76.9531	90.1786	155.02	96.766	138.554								68.4375	289.683	210.241	80.5038	394.578
82.0833	65.5844	132.874	96.766	138.554								73	132.54	210.241	77.0037	246.386
82.0833	55.6391	132.874	83.5706	138.554								73	278.571	210.241	73.7952	197.108
82.0833	54.1383	132.874	83.5706	137.349								73	278.571	210.241	73.7952	140.792
82.0833	56.4286	132.874	79.9371	137.349								73	222.857	280.321	73.7952	197.108
82.1667	58.664	132.702	83.5706	138.554								73	222.857	280.321	70.8434	246.386
82.1667	43.1973	132.874	87.5502	138.554								68.4375	222.857	280.321	70.8434	226.104
94.8077	39.0553	132.874	96.766	138.554								68.4375	222.857	280.321	70.8434	339.157
82.0833	44.8413	132.874	108.15	138.554								68.4375	185.714	280.321	73.7952	339.157
82.0833	44.8413	132.874	108.15	138.554								68.4375	185.714	210.241	71.6606	140.62
82.0833	42.0918	155.02	108.15	138.554								64.4118	222.857	280.321	78.4854	123.042
94.8077	39.2857	155.02	114.91	138.554								64.4118	222.619	280.321	82.4699	140.62
94.8077	38.0184	477.108	147.791	138.554								97.875	222.619	420.482	103.087	123.042
94.8077	36.8304	477.108	296.386	137.349								262.917	185.516	798.795	94.5382	123.042
301.875	38.0184	477.108	367.47	137.349								75.3846	185.516	399.398	101.291	109.371
152.969	39.3254	477.108	367.47	137.349								70	190.476	266.265	101.291	109.371
101.979	39.3254	462.048	306.225	137.349								62.6389	126.984	399.398	374.699	84.2169
94.1346	39.3254	303.012	367.47	101.205								62.6389	123.98	176.386	251.406	105.422
94.1346	39.3651	242.41	367.47	71.0843								72.1667	86.7063	176.386	251.406	93.7082
94.0385	38.0952	129.036	148.193	142.169								72.1667	63.4454	176.145	251.406	105.271
81.5833	36.9048	107.53	148.193	70.4819								67.6562	56.7669	176.145	251.406	105.271
74.3382	38.0952	99.2586	148.193	140.964								66.25	56.7043	266.265	251.406	105.422
74.3382	39.3651	99.2586	148.193	140.964								66.25	51.3605	266.265	301.687	129.398
66.5132	45.4212	75.9036	148.193	140.964								66.3235	49.026	266.265	301.687	121.687
60.1786	118.095	75.8327	147.892	140.964								66.3235	49.026	114.006	301.687	98.4337
60.1786	84.3537	80.5723	147.892	140.964								72.1667	49.026	101.339	301.687	98.4337
70.2083	78.7302	75.8327	147.892	139.759								72.1667	49.026	82.9135	251.406	98.4337
78.9844	102.165	75.7619	147.892	139.759								83.2692	49.026	134.036	251.205	109.237
78.9844	166.071	85.8635	147.892	139.759								83.2692	39.9471	108.434	301.446	109.237
79.1406	81.6327	80.497	148.193	139.759								83.2692	43.1429	92.0683	301.446	122.892
79.1406	71.4286	80.497	592.771	109.639								83.2692	212.202	152.209	251.205	122.892
79.1406	63.4921	76.4706	1839.76	109.639								83.3654	131.633	176.386	251.205	140.448
90.4464	60.1504	80.497	1839.76	138.554								83.2692	98.8095	130.637	301.446	122.892
84.4167	62.9762	67.7869	1839.76	138.554								108.75	72.4603	130.637	301.446	124.269
103.636	69.9735	71.5529	1839.76	138.554								98.4091	307.143	130.637	376.807	109.371
103.636	84.8214	80.497	1839.76	138.554								83.2692	155.442	130.637	502.41	98.4337
126.667	87.6984	99.0732	730.723	138.554								83.2692	65.4062	114.157	502.41	82.0281
142.5	80.9524	91.9966	195.181	138.554								83.3654	69.5685	130.637	545.783	82.0281
81.4167	105.238	80.497	310.843	138.554								83.3654	54.5238	130.637	504.819	140.62
70.5556	87.6984	80.497	233.434	138.554								83.3654	46.9742	130.637	336.546	140.62
70.4861	92.5325	80.497	233.434	138.554								134.643	49.0166	182.892	289.759	82.0281
70.5556	85.8135	80.497	233.434	138.554								75.4808	49.513	130.637	289.759	81.9277
70.5556	102.976	80.497	233.434	138.554								75.3846	45.3869	130.637	289.759	81.9277
70.5556	79.2125	80.497	233.434	138.554								75.3846	43.5714	130.637	505.422	98.3133
70.625	79.2125	80.497	193.287	137.349								75.3846	51.8707	228.313	232.048	89.4852
70.625	105.423	80.497	155.622	137.349								75.3846	51.8707	724.096	208.635	82.0281
70.625	410.119	80.497	181.067	138.554								65.3333	49.513	228.614	208.635	75.7183
74.7794	205.06	75.7619	156.506	138.554								65.4167	47.3602	201.446	208.635	75.7183
79.5	118.75	75.8327	142.278	138.554								65.8594	47.9167	840.964	171.62	82.0281
70.6944	127.041	117.922	156.506	138.554								65.8594	47.9167	244.277	171.62	89.4852
70.6944	177.857	761.446	181.392	138.554								65.8594	47.9167	215.06	140.416	89.4852
66.9737	380.357	107.43	163.253	138.554								65.3333	49.9482	126.85	140.416	89.4852
70.6944	195.714	105.12	181.392	138.554								65.3333	49.9482	110.994	128.715	89.4852
70.6944	258.929	117.306	181.392	138.554								65.3333	49.9482	110.994	137.021	81.9277
66.9737	170.238	92.1687	163.133	138.554								65.3333	49.9482	398.795	125.181	81.9277
66.9737	204.286	75.9036	163.133	138.554								65.3333	49.9482	358.434	125.181	81.9277
66.9737	196.667	75.9036	181.258	137.349								65.3333	49.9482	210.241	139.09	89.3757
70.6944	163.889	71.6867	125	137.349								65.25	52.2186	140.161	125.181	79.08
79.5312	245.833	67.9138	111.111	138.554								65.3333	47.8671	140.161	102.972	82.0281
203.75	256.349	107.229	125	138.554								65.3333	46	140.161	102.972	98.4337
94.7115	256.349	107.229	111.111	138.554								75.3846	47.9167	168.193	102.972	193.574
82.1667	160.317	310.442	125	138.554								81.6667	63.8228	210.241	102.972	286.747
94.7115	120.238	310.442	145.649	138.554								85.7955	63.8228	210.241	96.5361	286.747
94.7115	160.317	310.442	145.649	138.554								65.3333	81.8027	280.321	96.5361	790.361
82.0833	128.869	310.442	119.168	137.349								65.3333	136.161	210.241	96.5361	493.373
82.0833	159.921	232.831	119.058	137.349								65.25	99.026	209.94	96.5361	164.458
76.9531	128.869	232.831	130.964	137.349								65.25	90.7738	167.952	96.5361	164.458
76.9531	128.869	310.442	124.973	71.0843								65.25	83.6996	210.241	96.5361	140.964
76.9531	128.869	310.442	124.973	71.0843								65.25	68.006	210.241	85.8099	123.343
76.9531	171.825	186.265	124.973	71.0843								65.3333	90.6746	280.321	85.8099	123.343
77.0312	171.825	137.048	124.973	71.0843								65.25	120.899	280.321	85.8099	197.349
77.0312	50.8929	137.048	124.973	140.964								70	144.048	280.321	82.3494	164.458
77.0312	44.2577	137.048	114.558	140.964								73	144.048	280.321	82.3494	157.831
82.0833	46.6553	156.627	120.667	139.759								73	137.649	232.831	78.428	521.687
82.0833	42.5983	156.627	130.723	139.759								68.4375	122.354	232.831	78.428	197.289
82.0833	39.8384	186.024	156.867	139.759								68.4375	122.354	232.831	78.428	157.831
82.0833	41.3139	186.024	156.867	139.759								68.4375	81.4626	232.831	77.0037	157.831
82.0833	41.3139	186.024	142.607	138.554								68.4375	81.4626	280.321	73.7952	140.792
82.0833	39.8384	186.024	112.048	138.554								73	110.119	210.241	77.0037	140.792
88.0357	34.8586	155.02	112.048	138.554								64.4118	116.667	280.321	84.3373	140.792
94.8077	34.8586	155.02	92.275	138.554								64.4118	95.4545	280.723	80.5038	164.257
94.7115	35.9831	155.02	81.4458	138.554								64.3382	116.667	800	73.7952	164.257
82.0833	40.2842	155.02	87.5502	138.554								63.5156	150	798.795	73.7952	140.792
82.0833	38.5057	155.221	91.9277	138.554								173.75	257.937	399.398	73.7952	123.193
88.0357	98.7013	133.046	96.766	138.554								97.875	96.6667	266.265	73.7952	123.193
94.8077	83.5165	132.874	102.142	138.554								68.25	138.095	176.386	70.8434	196.867
94.8077	57.8704	132.702	102.142	138.554								68.3333	138.095	176.386	68.1186	119.277
94.8077	60.5742	132.874	91.9277	138.554								72.1667	241.667	176.145	68.1186	263.052
111.25	54.198	132.874	87.5502	138.554								67.6562	217.262	176.145	73.7952	164.257
101.979	104.405	132.874	83.5706	138.554								72.1667	173.81	125.818	73.7952	140.792
94.1346	98.3766	132.874	91.9277	138.554								72.1667	217.262	130.465	78.4854	246.386
94.1346	72.1429	132.874	87.5502	137.349								67.6562	173.81	130.465	78.4854	394.578
94.0385	60.7143	132.874	96.766	138.554								66.25	488.095	130.465	78.5427	226.104
81.5	52.8571	132.874	108.15	138.554								66.25	222.857	130.465	86.8104	200.301
74.3382	48.7578	162.651	108.15	138.554								66.3235	159.184	152.209	109.96	365.06
74.3382	45.1923	477.108	114.91	138.554								66.3235	222.857	176.145	117.814	226.104
70.2083	49.0079	477.108	147.791	138.554								77.3214	278.571	130.465	121.151	246.084
84.25	47.0476	477.108	202.008	138.554								83.2692	222.857	130.465	251.406	164.056
78.9844	41.7077	477.108	459.337	138.554								83.2692	185.714	130.465	251.406	140.62
78.9844	41.7077	462.048	367.47	138.554								83.2692	185.714	130.465	215.491	123.042
79.0625	41.7488	308.032	367.47	138.554								83.2692	222.857	130.637	215.491	98.4337
79.0625	43.2398	202.008	367.47	138.554								83.2692	278.274	130.637	215.491	98.4337
79.1406	40.6404	129.036	367.47	137.349								83.3654	222.619	130.637	251.406	89.4852
79.1406	42.0918	107.53	367.47	137.349								98	185.516	130.465	301.687	93.5743
84.4167	42.0918	99.2586	367.47	137.349								122.344	222.619	130.465	301.687	105.271
90.4464	43.6508	75.8327	148.193	138.554								108.25	151.786	130.465	301.687	93.5743
90.4464	40.6404	71.6198	148.193	138.554								83.2692	151.786	130.465	251.406	93.5743
81.4286	40.6814	71.6198	148.193	138.554								83.2692	82.3593	130.637	251.406	93.5743
103.636	39.3254	71.6198	148.193	138.554								83.3654	113.244	130.637	251.406	89.4852
114	39.3254	80.5723	148.193	138.554								83.3654	64.7109	130.637	301.687	82.0281
190	39.3651	85.8635	147.892	138.554								83.3654	53.9286	130.637	251.205	82.0281
95	39.3651	91.9966	147.892	137.349								83.3654	53.9286	130.637	251.205	82.0281
70.5556	38.0952	85.8635	147.892	137.349								85.6818	53.869	130.637	251.205	89.4852
74.7059	40.7225	80.497	147.892	137.349								75.4808	51.3605	152.209	251.205	89.4852
74.7794	42.1769	76.4706	147.892	71.0843								75.4808	49.026	182.651	301.446	82.0281
70.625	42.1769	80.497	434.94	47.3896								75.3846	49.026	567.47	376.807	122.892
74.7794	45.4212	75.7619	1839.76	47.3896								75.3846	51.3605	165.06	502.41	109.237
198.542	42.1344	75.7619	1839.76	47.3896								75.3846	59.9206	167.871	502.41	163.855
99.2708	62.0927	80.497	1839.76	47.3896								65.3333	134.821	280.723	502.41	122.892
74.7794	84.2687	99.0732	1839.76	70.4819								65.8594	47.6687	840.964	545.783	122.892
70.625	63.4921	80.497	1839.76	70.4819								65.8594	35.7515	325.703	1091.57	98.4337
70.6944	71.4286	80.497	1839.76	40.9639								65.4167	66.3165	175.301	406.024	82.0281
70.6944	67.2269	80.497	296.386	70.4819								65.4167	59.3358	175.301	1092.77	89.4852
70.6944	60.1504	80.497	312.771	70.4819								65.3333	77.7211	116.867	504.819	82.0281
66.9737	63.4921	80.497	312.771	139.759								65.3333	79.4218	107.952	336.546	82.0281
66.9737	81.6327	80.497	390.964	139.759								65.3333	55.5952	110.994	336.546	82.0281
66.9737	127.083	80.497	223.408	139.759								65.3333	77.7211	210.241	336.546	75.7183
66.9737	101.786	85.8635	195.482	138.554								65.3333	77.7211	210.241	252.41	75.7183
66.9737	95.671	85.8635	195.482	138.554								70	61.8386	210.241	232.048	81.9277
70.6944	105.238	85.8635	233.434	138.554								72.5	55.6548	210.241	232.048	89.3757
408.75	105.238	80.497	186.747	138.554								67.3214	51.9274	209.94	208.635	81.9277
150.893	75.1701	85.8635	193.287	138.554								70	45.3869	209.94	208.635	75.6256
117.361	70.1587	85.9438	156.506	138.554								70	41.7549	279.92	208.635	75.7183
90.9821	103.095	100.241	173.896	138.554								85.7955	41.7549	280.321	171.62	75.7183
116.528	85.8135	113.253	130.422	138.554								94.375	41.8956	210.241	171.62	82.0281
229.375	79.2125	128.916	142.169	138.554								70	45.3869	210.241	171.62	82.0281
111.932	86.2554	80.5723	156.386	138.554								65.3333	51.8707	280.321	140.416	89.4852
102.604	105.423	71.6198	136.044	138.554								65.25	54.4643	280.321	140.416	82.0281
82.0833	494.048	161.145	136.044	138.554								65.25	51.8141	280.321	140.416	82.0281
76.9531	158.135	117.196	136.044	137.349								65.25	43.5238	280.321	140.416	81.9277
72.4265	135.544	99.1659	148.302	138.554								65.25	47.9167	280.321	139.09	81.9277
72.4265	148.214	92.1687	148.302	138.554								251.25	47.9167	280.321	125.181	81.9277
76.9531	182.44	80.6476	135.944	138.554								122.344	47.9167	232.831	136.692	81.9277
77.0312	466.667	67.9138	135.944	138.554								75.2885	49.9482	232.831	102.972	75.6256
77.0312	244.643	67.9138	135.944	138.554								73	49.9482	232.831	102.972	82.0281
88.0357	255.357	67.9772	135.944	138.554								68.4375	49.9482	232.831	102.972	98.4337
82.0833	510.714	228.916	129.025	138.554								68.4375	49.9482	186.265	102.972	290.361
82.0833	503.571	228.916	141.928	138.554								68.4375	49.9482	186.265	96.5361	493.373
76.9531	196.667	465.663	141.928	138.554								73	49.9482	210.542	96.5361	328.916
82.0833	196.667	310.442	131.084	138.554								73	49.9482	210.542	96.5361	395.181
82.0833	256.349	232.831	119.168	137.349								78.2143	44.185	800	96.5361	246.687
82.1667	192.262	232.831	119.058	137.349								64.4118	42.5485	800	96.5361	328.916
82.1667	160.317	232.831	119.058	138.554								64.3382	44.185	400	96.5361	246.687
88.0357	160.317	232.831	119.058	138.554								68.3594	41.0289	399.398	86.6836	164.458
87.9464	240.476	120.482	130.964	138.554								136.719	37.0584	266.265	82.3494	140.964
82.0833	159.921	169.88	124.973	138.554								257.5	71.8006	266.265	82.3494	140.964
82.0833	159.921	232.831	114.558	138.554								218.333	127.646	146.988	82.3494	140.964
87.9464	128.869	186.024	114.558	137.349								78.75	90.6746	143.373	82.3494	109.639
88.0357	128.869	156.454	114.558	137.349								73.125	77.8061	176.386	78.428	157.831
94.8077	128.869	156.454	120.76	137.349								94.25	90.7738	176.145	78.428	157.831
94.8077	239.881	156.627	112.048	137.349								72.1667	77.7211	146.787	78.428	521.687
112.045	239.881	182.731	104.578	47.3896								72.1667	98.9177	130.465	78.428	213.655
114.375	45.6349	186.024	112.048	47.3896								72.1667	91.7659	130.465	80.5038	164.257
94.1346	50.1134	186.024	120.667	46.988								67.6562	100.108	152.209	80.5038	164.257
87.4107	43	186.024	104.578	46.988								67.6562	100.108	176.145	84.3373	123.193
94.1346	42.5983	155.02	112.048	46.988								66.25	100.108	176.145	80.5038	123.193
94.1346	41.3004	155.02	112.048	70.4819								66.25	100.108	152.209	77.0037	140.792
87.4107	38.4647	155.02	104.578	70.4819								66.3235	73.4127	130.465	77.0037	164.257
78.9844	39.8384	155.221	97.9669	70.4819								70.4688	71.2798	130.465	80.5038	140.792
78.9844	39.8384	155.221	91.9277	70.4819								83.2692	73.4127	130.465	73.7952	140.792
78.9844	39.8384	155.02	91.9277	70.4819								83.2692	78.6565	130.465	70.8434	140.792
84.25	39.8384	132.874	96.766	70.4819								83.2692	100.108	130.465	70.8434	164.257
84.25	42.1593	132.874	102.142	70.4819								72.1667	100.108	114.157	70.8434	164.257
78.9844	45.7557	132.874	102.142	139.759								77.3214	116.667	114.157	73.7952	226.104
78.9844	38.5057	132.874	96.766	138.554								83.2692	116.667	130.465	73.7952	226.104
79.0625	38.5057	132.874	91.9277	138.554								81.6667	150	130.465	73.7952	119.277
79.1406	72.381	132.874	114.91	138.554								108.889	161.111	130.465	76.9513	246.386
79.1406	78.4799	132.874	108.15	138.554								83.2692	161.111	130.465	76.9513	197.108
79.1406	68.0159	132.874	87.4928	138.554								83.2692	120.833	130.637	80.4491	246.386
95	58.7963	132.874	79.8848	138.554								83.2692	138.095	130.465	84.28	263.052
95	52.9167	154.819	87.4928	138.554								83.2692	242.262	130.637	82.4699	306.024
81.4286	67.6339	154.819	122.49	138.554								90.3125	143.155	130.637	106.58	424.096
103.636	70.0149	477.108	131.239	138.554								98.5227	143.155	130.637	170.361	365.06
114	62.2354	477.108	131.239	138.554								98.5227	185.714	130.637	301.687	210.542
142.5	50.9199	477.108	131.239	138.554								83.3654	222.857	130.637	251.406	140.62
142.5	48.706	462.048	306.225	138.554								90.3125	139.286	152.209	215.491	140.62
103.523	48.0519	308.032	306.225	138.554								78.5417	139.286	228.313	188.554	123.042
79.375	49.0079	231.024	367.47	138.554								75.4808	159.014	488.554	188.554	123.042
84.6667	43.5626	202.008	367.47	138.554								75.4808	185.516	350.602	215.491	109.371
106	42.0068	161.295	367.47	138.554								75.3846	222.619	210.361	251.406	89.4852
99.375	40.3175	143.373	367.47	138.554								75.3846	278.274	131.476	301.687	89.4852
74.8529	41.7077	129.036	367.47	138.554								75.3846	278.274	105.181	301.687	89.4852
74.8529	41.7077	80.6476	367.47	138.554								75.3846	222.857	119.946	251.406	89.3757
70.6944	40.3571	71.6198	148.193	137.349								70	185.516	126.85	251.406	89.3757
70.6944	40.6404	71.6198	148.193	137.349								70.0893	185.516	110.994	251.406	89.3757
66.9737	42.0918	80.5723	148.193	137.349								75.4808	139.137	398.795	301.687	82.0281
70.6944	42.0918	64.4578	306.426	138.554								70.0893	251.19	420.482	251.406	82.0281
66.9737	43.6508	64.4578	306.426	138.554								70.0893	163.69	210.241	251.205	82.0281
66.9737	40.6404	80.5723	147.892	138.554								65.3333	51.3605	210.241	251.205	82.0281
66.9737	40.6404	85.8635	197.189	138.554								65.3333	56.7669	210.241	301.446	82.0281
74.5312	40.6814	80.5723	147.892	138.554								65.3333	53.9286	210.241	502.41	82.0281
251.25	40.6814	80.5723	147.892	137.349								65.3333	51.3605	209.94	502.41	82.0281
97.9808	39.3254	99.0732	147.892	137.349								70	49.026	209.94	502.41	89.4852
100.25	39.3651	71.5529	197.189	71.0843								75.3846	53.9286	209.94	502.41	89.3757
95.625	40.7225	71.5529	197.189	47.3896								72.5	51.3605	280.321	376.807	89.3757
90.9821	42.1769	71.5529	197.189	46.988								70	49.026	420.482	376.807	109.237
87.875	42.1769	80.497	296.386	47.3896								69.9107	49.026	280.321	1091.57	89.3757
305.833	42.1769	80.497	296.386	47.3896								85.6818	264.286	280.321	1091.57	81.9277
102.604	42.1344	80.497	919.88	70.4819								94.25	182.381	280.321	1092.77	82.0281
87.9464	34.3254	80.497	1839.76	70.4819								94.375	80.6122	280.321	1092.77	82.0281
87.9464	45.3755	80.497	1839.76	70.4819								70	52.4351	280.321	1092.77	82.0281
76.9531	65.5423	80.497	1839.76	70.4819								65.25	50.1553	280.321	1092.77	75.7183
72.4265	54.4218	80.497	1839.76	70.4819								65.25	51.2446	280.321	63.8554	75.7183
72.4265	53.5714	80.497	1839.76	70.4819								81.5625	55.5952	232.831	504.819	75.7183
77.0312	56.1224	80.497	195.482	70.4819								405	52.9478	232.831	504.819	70.3098
77.0312	58.9286	80.497	390.964	138.554								78.2143	55.5952	280.321	336.948	75.7183
81.875	78.5714	80.497	316.867	138.554								73	74.2063	232.831	252.711	75.6256
88.0357	70.2381	80.497	195.482	138.554								73	65.4762	186.265	252.711	75.6256
76.9531	65.8482	80.497	195.482	138.554								73	58.584	155.422	201.506	70.2238
76.9531	73.5863	80.497	195.482	138.554								73	60.582	133.219	201.506	75.6256
76.9531	69.2577	80.5723	211.245	138.554								68.3594	47.3602	210.542	179.116	75.7183
76.9531	69.2577	89.1566	233.012	138.554								68.3594	43.3608	210.542	183.802	82.0281
82.0833	61.9048	76.3339	208.95	137.349								64.3382	40.2636	800	165.422	89.4852
82.1667	58.8095	85.9438	162.383	138.554								64.3382	40.3439	800	165.422	89.4852
82.1667	58.8095	71.6198	130.422	138.554								78.125	54.4643	800	150.383	89.4852
82.1667	82.483	92.0826	130.321	138.554								157.083	49.513	400	154.458	82.0281
88.0357	80.1282	85.9438	142.169	138.554								188.5	49.513	800	140.416	82.0281
82.0833	74.7024	80.5723	156.386	138.554								257.5	51.8141	266.265	140.416	82.0281
82.0833	85.3741	67.9138	136.044	138.554								108.889	44.2308	266.265	140.416	81.9277
87.9464	94.881	64.5181	136.044	138.554								81.5625	44.2308	146.988	140.416	81.9277
88.0357	164.881	64.5181	136.044	138.554								81.5625	47.9167	125.99	140.307	75.6256
94.8077	164.881	64.5181	116.523	138.554								184.75	46.381	143.373	140.307	89.4852
94.8077	178.095	67.9772	116.523	137.349								67.6562	48.3135	176.386	125.201	98.4337
102.708	134.354	931.325	125.487	137.349								67.6562	48.2639	176.145	102.892	262.651
130.714	146.599	466.265	125.487	137.349								77.3214	49.9482	146.787	102.972	493.373
94.1346	509.524	228.916	116.523	137.349								67.6562	49.9482	130.465	102.972	986.747
94.1346	258.333	931.325	116.523	138.554								66.25	49.9482	130.465	96.5361	986.747
101.979	204.286	931.325	125.487	138.554								66.25	52.2186	176.145	96.5361	164.458
101.979	204.286	310.442	125.487	138.554								66.25	52.2186	265.863	96.5361	246.687
94.1346	204.286	186.265	125.487	138.554								66.3235	47.8671	220.181	90.8575	328.916
111.25	245.536	232.831	135.944	137.349								72.1667	42.5485	152.209	85.8099	140.964
101.979	196.429	113.855	119.168	137.349								90.2083	46	152.209	91.4993	140.964
90.2679	192.262	107.229	119.058	142.169								83.2692	44.185	130.465	91.4993	140.964
97.2115	153.81	120.482	119.058	46.988								83.2692	39.6141	91.3253	86.6836	123.343
90.2679	103.333	113.855	130.964	46.988								70.3906	71.8006	76.1044	78.428	109.639
84.25	103.333	310.04	130.964	71.0843								77.3214	82.0578	114.157	78.428	140.964
78.9844	103.333	182.53	124.973	71.0843								83.2692	72.5397	101.473	78.428	140.792
79.0625	103.333	182.53	114.558	70.4819								83.2692	75.1984	82.3293	78.428	197.108
79.0625	129.167	186.024	114.558	70.4819								83.3654	99.026	130.465	78.428	209.337
79.1406	128.869	186.265	114.558	70.4819								83.2692	99.026	130.465	78.428	164.257
74.4853	128.869	186.265	114.558	70.4819								83.2692	123.363	130.465	78.428	140.792
95	128.869	186.265	112.048	70.4819								90.2083	100.108	152.209	78.428	123.193
95	171.825	186.265	104.578	70.4819								83.2692	100.108	130.465	78.428	123.193
76	171.825	155.221	104.578	70.4819								90.2083	100.216	130.465	82.3494	140.792
95	41.2257	155.221	104.578	70.4819								98.5227	100.216	130.465	84.3373	140.792
114	41.2257	155.221	104.578	138.554								98.5227	100.216	138.353	77.0037	140.792
142.5	41.2257	155.221	104.578	138.554								83.3654	73.4127	138.353	77.0037	140.792
228	41.2698	155.02	104.578	138.554								98.4091	73.4127	130.637	77.0037	140.792
140	39.7959	155.02	120.667	138.554								81.7708	78.6565	130.637	77.0037	164.257
113.333	38.4236	132.874	131.239	138.554								75.4808	100.108	152.209	73.7952	197.108
132.361	39.8384	132.874	114.834	138.554								75	100.108	283.735	77.0037	226.104
170	39.8384	132.874	114.834	138.554								75.4808	100.108	807.229	73.7952	226.104
146.042	39.8384	132.874	108.15	138.554								75.3846	116.667	350.602	73.7952	226.104
74.8529	66.9218	132.874	108.15	137.349								75.3846	116.667	210.361	73.7952	196.867
74.8529	94.3122	132.874	102.142	138.554								94.25	210	150.258	73.7952	164.257
74.8529	141.468	132.874	91.9277	138.554								81.6667	289.286	150.258	73.7952	197.108
74.8529	72.381	132.874	83.5706	138.554								75.3846	167.857	222.289	76.9513	246.386
70.6944	45.2381	132.702	102.142	138.554								75.4808	112.037	147.992	73.745	212.048
70.6944	44.0476	132.702	102.075	138.554								70.0893	120.833	127.022	73.745	105.271
70.6944	42.2857	154.819	87.4928	138.554								70.0893	193.333	111.145	76.9513	98.4337
70.7639	50.3401	477.108	76.5562	138.554								70.0893	289.683	398.795	80.4491	123.042
74.8529	48.0519	354.217	79.8848	138.554								65.3333	241.071	200	91.6332	140.62
170.357	48.0519	354.217	83.5159	137.349								65.3333	227.381	280.321	125.958	123.042
90.9821	53.288	308.032	122.49	137.349								70	105.952	200	754.217	164.056
103.75	56.0119	250.301	131.239	137.349								63.2812	185.714	272.289	377.108	123.042
85	56.0119	161.145	114.834	137.349								70	185.714	210.241	301.687	98.4337
90.9821	48.706	242.41	262.478	138.554								70	139.286	210.241	251.406	89.4852
143.75	48.706	129.036	306.225	138.554								67.5	123.677	209.94	215.491	89.4852
104.75	49.0079	99.2586	306.225	138.554								67.5	139.137	209.94	215.491	89.4852
82.0833	49.0079	92.1687	306.225	138.554								72.5	185.516	280.321	215.491	84.2169
82.0833	45.2381	86.0241	367.47	138.554								117.812	185.516	280.321	301.687	89.3757
82.0833	40.5583	75.8327	367.47	137.349								94.25	185.516	280.321	301.687	89.3757
76.9531	39.0169	75.8327	367.47	71.0843								157.292	222.619	280.321	377.108	89.3757
72.4265	40.3175	85.9438	367.47	71.0843								108.889	185.516	280.321	377.108	82.0281
72.4265	40.3175	85.9438	148.193	71.0843								75.3846	139.137	280.321	301.687	82.0281
77.0312	40.3571	71.6198	148.193	71.0843								202.5	222.619	280.321	301.687	82.0281
82.0833	40.6404	80.5723	118.554	71.0843								91.25	159.014	420.482	301.687	70.3098
81.875	40.6404	85.9438	306.426	70.4819								73	126.587	280.321	251.406	82.0281
87.9464	40.6404	92.0826	306.426	70.4819								73	163.69	280.321	215.491	82.0281
76.9531	43.6508	85.9438	147.892	71.0843								73	49.026	232.831	301.687	89.4852
76.9531	43.6508	85.9438	147.892	71.0843								72.9167	49.026	232.831	546.386	89.3757
76.9531	40.6404	80.497	197.189	71.0843								68.3594	49.026	232.831	546.386	81.9277
76.9531	40.6814	71.5529	197.189	70.4819								68.3594	49.026	186.265	546.386	81.9277
82.0833	42.1344	71.5529	147.892	70.4819								68.3594	51.3605	186.265	364.257	89.3757
82.1667	40.6814	80.497	118.313	70.4819								78.125	49.026	155.221	376.807	75.7183
82.1667	42.1769	80.497	118.313	70.4819								91.1458	49.026	133.219	251.205	75.7183
82.1667	42.1769	80.497	147.892	69.8795								134.643	53.869	210.542	215.318	82.0281
88.0357	42.1769	80.497	147.892	139.759								157.083	53.9286	210.542	251.205	82.0281
87.9464	42.1769	80.497	118.554	138.554								89.0909	129.592	800	545.783	75.7183
82.0833	42.1769	80.497	148.193	138.554								78.1731	75.2381	800	1091.57	70.3098
82.0833	43.6949	80.497	367.952	138.554								108.75	62.6984	800	1091.57	70.3098
88.0357	36.8676	80.497	296.386	138.554								67.6562	56.4286	800	1092.77	70.3098
88.0357	45.3755	80.497	1839.76	138.554								67.6562	51.2987	400	1092.77	65.6225
94.8077	51.294	80.497	1839.76	138.554								67.6562	50.5411	159.759	1092.77	70.2238
94.8077	57.1429	80.497	173.762	138.554								77.3214	55.5952	199.699	1092.77	70.2238
132.083	57.1429	80.497	173.762	138.554								67.6562	55.5952	146.988	310.843	75.6256
111.932	63.4921	80.497	181.067	138.554								66.25	50.5952	159.759	336.546	81.9277
94.1346	65.4762	80.497	173.762	138.554								66.25	61.8386	199.699	336.948	75.7183
94.1346	78.5714	80.497	173.762	138.554								66.25	74.2063	266.265	252.711	82.0281
94.1346	69.2577	80.5723	181.067	137.349								72.0833	64.1457	176.145	232.048	89.4852
94.1346	65.4101	85.9438	223.58	138.554								83.3654	68.1548	146.787	230.293	89.4852
87.5	65.4101	107.43	208.778	138.554								90.2083	60.5159	146.787	201.506	89.4852
87.4107	65.4101	107.43	162.383	138.554								83.2692	41.8956	265.863	150.383	82.0281
101.979	73.5863	107.43	132.859	138.554								83.2692	43.5714	176.145	148.092	82.0281
111.25	65.4101	80.5723	121.787	138.554								77.3214	51.8707	152.209	148.092	81.9277
162.857	69.1877	80.5723	120.297	138.554								77.3214	54.4643	166.024	161.555	81.9277
142.5	69.1877	67.9138	120.297	138.554								72.1667	49.513	152.209	148.092	81.9277
102.083	74.915	64.5181	120.297	138.554								83.2692	49.513	152.209	136.701	79.08
84.25	80.6777	61.4458	142.169	138.554								83.3654	47.3602	152.209	150.383	98.4337
87.5	70.3081	67.9138	142.169	137.349								83.2692	47.3085	72.2892	140.307	262.651
87.5962	85.3741	71.7537	125.487	137.349								83.2692	41.4116	76.1044	140.307	140.964
81.4286	99.6032	67.9772	108.755	137.349								90.2083	46.381	101.473	140.307	140.964
74.4853	117.063	703.614	108.755	138.554								83.2692	48.3135	114.157	140.307	164.458
66.7105	219.841	466.265	108.755	138.554								83.2692	48.3135	114.157	140.307	164.458
66.7105	152.381	509.639	108.755	138.554								90.3125	48.3135	130.465	110.241	140.964
70.4167	134.184	465.663	108.755	138.554								90.3125	48.2639	130.465	110.241	123.343
81.8333	128.274	232.831	116.523	138.554								98.5227	48.2639	130.465	100.161	123.343
76.7188	205.238	232.831	116.523	71.0843								90.2083	49.9482	152.209	102.892	123.343
81.8333	258.333	113.855	116.523	71.0843								235.625	54.7052	152.209	96.4608	131.526
94.4231	516.667	465.06	116.523	71.0843								108.25	54.7052	130.465	96.4608	123.343
297.812	516.667	186.024	125.394	71.0843								74.9107	47.8671	130.465	96.4608	140.964
595.625	185.317	182.731	135.843	71.0843								74.9107	47.9167	138.353	96.4608	140.964
84.8333	245.536	182.731	119.058	71.0843								74.9107	50	166.024	96.4608	140.964
70.6944	327.381	182.731	119.058	71.0843								74.9107	49.9482	200.402	86.6836	197.349
70.6944	196.429	182.731	119.058	71.0843								74.9107	54.7052	152.41	86.6836	164.458
70.6944	128.175	186.265	119.058	71.0843								75.3846	52.2186	166.024	86.6836	197.349
74.8529	128.175	155.221	130.964	71.0843								75.3846	63.8228	283.735	82.3494	140.964
70.6944	86.1111	155.221	114.558	71.0843								78.5417	68.006	434.94	78.428	98.6747
70.6944	86.1111	186.265	114.558	70.4819								110.469	75.1984	420.482	78.428	109.505
70.6944	86.1111	186.265	105.746	69.8795								117.969	108.929	350.602	78.428	123.193
74.9265	86.1111	186.265	104.578	69.8795								75.4808	98.6905	350.602	78.428	123.193
79.5	86.1111	155.02	112.048	139.759								75.4808	84.7985	350.602	78.4854	123.193
273.333	103.333	155.02	104.578	138.554								70.0893	100.216	403.614	78.4854	123.193
292.5	103.333	155.02	108.15	138.554								70.0893	100.216	403.614	78.4854	140.792
90.9821	128.869	132.874	108.15	138.554								70	100.216	403.614	78.4854	109.505
90.9821	171.825	132.874	108.15	138.554								63.2812	91.8651	127.022	86.747	98.5542
84.9167	171.825	132.874	104.578	138.554								63.2812	91.8651	127.022	86.747	123.193
75	41.2257	132.874	104.578	138.554								63.2812	78.7415	400	82.4096	164.257
79.6094	41.2257	132.874	114.834	138.554								67.5	68.8988	400	80.5586	196.867
84.3333	41.2257	132.874	122.49	138.554								67.5	73.4127	400	77.0037	164.056
82.9464	41.2257	132.874	131.239	138.554								67.5	91.7659	272.289	77.0037	164.056
105.568	41.2698	132.874	114.834	138.554								70	84.707	191.165	77.0037	196.867
82.0833	34.7279	132.702	114.834	138.554								75.3846	91.7659	209.94	73.7952	197.108
82.0833	39.7959	116.114	114.834	137.349								162	150	209.94	73.7952	262.651
94.7115	44.5813	154.819	96.766	137.349								405	131.25	279.92	73.7952	212.048
115	41.3139	154.819	87.5502	138.554								625	210	280.321	73.7952	197.289
262.188	106.101	925.301	87.5502	138.554								78.2143	221.032	280.321	77.0037	98.5542
163.75	43.1548	308.434	91.9277	138.554								73	181.944	420.482	73.7952	98.4337
163.75	39.4558	308.434	96.7026	138.554								68.4375	167.857	420.482	73.8454	98.4337
87.9464	82.1429	308.434	91.8675	138.554								68.3594	111.905	280.321	77.0561	123.042
76.9531	61.8304	250.301	87.4928	138.554								68.3594	138.095	280.321	73.7952	123.042
82.0833	55.6391	303.012	79.8848	138.554								68.3594	161.111	420.482	73.7952	109.371
82.0833	45.9627	242.41	79.8848	138.554								68.3594	80.9524	420.482	74.9179	109.371
82.0833	42.8095	92.1687	102.075	137.349								68.3594	143.095	280.321	78.5427	89.4852
82.1667	45.1007	92.1687	114.834	137.349								72.9167	185.714	232.53	97.0234	89.4852
82.1667	48.0519	86.0241	114.834	137.349								99.4318	185.714	232.53	109.96	89.4852
82.1667	48.6542	85.9438	183.735	138.554								185	111.429	186.024	128.246	89.4852
82.0833	48.6542	80.5723	204.15	138.554								235.625	111.31	186.265	377.108	89.3757
87.9464	50.8658	85.9438	306.225	138.554								109.125	123.677	186.265	301.687	98.3133
87.9464	50.9199	92.0826	306.225	138.554								99.2045	111.31	186.265	251.406	81.9277
87.9464	53.3447	92.0826	306.225	71.0843								72.75	111.31	186.506	251.406	89.3757
87.9464	50.9199	80.5723	262.478	71.0843								77.9464	123.677	155.422	251.406	81.9277
88.0357	53.4632	85.9438	262.478	71.0843								136.406	139.137	210.542	215.491	81.9277
88.0357	49.0079	99.1659	306.225	71.0843								67.6562	139.137	210.843	188.554	82.0281
88.0357	47.0476	99.1659	148.193	71.0843								67.6562	159.014	800	188.554	82.0281
94.8077	39.2063	92.0826	148.193	71.0843								72.1667	334.524	800	377.108	82.0281
94.7115	40.5583	85.9438	148.193	71.0843								67.6562	126.587	160	502.811	89.4852
198.125	40.3175	85.9438	306.225	71.0843								67.6562	251.19	133.333	215.491	82.0281
87.4107	40.3175	80.497	306.225	71.0843								67.6562	200.952	133.133	215.491	82.0281
87.4107	40.3175	75.7619	118.554	69.8795								67.6562	49.026	266.265	377.108	76.7798
87.4107	40.6404	58.5433	147.892	69.8795								77.3214	49.026	266.265	251.406	81.9277
94.1346	40.6404	80.497	197.189	69.8795								98.2955	49.026	159.759	251.406	81.9277
87.4107	40.6404	75.7619	197.189	69.8795								122.344	49.026	159.759	251.406	76.7798
87.4107	42.0918	80.497	147.892	69.8795								86.7308	46.8944	266.265	251.406	75.6256
90.2679	43.6508	80.497	118.313	69.8795								83.2692	46.8944	266.265	502.811	82.0281
111.364	42.0918	80.5723	118.313	139.759								90.2083	53.9286	176.145	1092.77	75.7183
285	40.6404	80.5723	118.313	139.759								108.25	80.0366	398.795	1092.77	75.7183
371.875	42.0918	80.497	118.313	138.554								108.25	69.3651	265.863	546.386	75.7183
190	43.6508	80.497	118.313	138.554								77.3214	95.5952	166.024	376.807	70.3098
103.636	43.6508	80.497	118.313	138.554								83.2692	138.69	199.398	215.318	70.3098
87.6923	42.1769	80.497	306.426	138.554								83.2692	195.833	199.398	215.318	65.6225
81.4286	42.1769	80.497	367.952	138.554								83.2692	56.4286	199.398	215.318	70.3098
81.3393	42.1769	80.497	149.398	138.554								83.2692	59.3985	146.787	545.783	70.2238
64.6053	43.6949	80.497	224.096	137.349								83.2692	62.6984	130.465	545.783	70.2238
66.7105	42.1344	80.497	122.49	138.554								90.2083	65.4062	114.157	215.318	75.6256
66.7105	43.6949	80.5723	153.112	138.554								90.2083	56.369	114.157	215.318	70.2238
74.5588	43.6949	92.0826	126.248	138.554								90.3125	52.9478	91.4458	753.614	70.2238
76.7188	53.6255	85.7612	126.248	138.554								90.3125	55.5952	91.3253	1092.77	82.0281
76.7188	54.4218	93.5743	135.959	138.554								98.5227	55.6548	114.307	546.386	82.0281
76.7188	57.1429	143.24	160.679	138.554								98.4091	61.8386	130.637	754.217	82.0281
87.6786	81.6327	99.1659	147.289	137.349								108.25	77.8912	130.637	278.795	82.0281
595.625	67.2269	80.5723	157.065	137.349								183.75	64.1457	130.637	232.048	82.0281
237.5	65.4762	71.6198	123.408	137.349								74.9107	72.6984	152.41	232.048	82.0281
70.6944	69.2577	64.5181	124.93	138.554								74.9107	77.8912	152.209	230.293	81.9277
70.6944	65.4101	67.9138	121.787	138.554								74.9107	51.8707	130.465	148.193	81.9277
70.6944	65.3439	71.6867	120.297	138.554								74.9107	47.3602	130.465	165.422	79.08
70.6944	58.8095	71.7537	120.297	138.554								75.3846	64.0756	150.301	183.802	98.494
70.6944	67.6587	71.7537	107.831	138.554								75.3846	54.4643	32.5301	161.555	140.964
70.6944	55.3571	71.7537	107.831	138.554								75.3846	47.3602	568.675	148.092	164.458
74.8529	55.3571	509.639	115.02	138.554								75.3846	49.513	182.892	148.092	159.94
74.8529	57.9932	509.639	115.02	137.349								147.292	47.3602	568.675	148.092	123.343
74.9265	87.4008	107.229	120.297	137.349								270	49.4589	840.964	118.474	123.343
79.6094	83.7912	113.855	116.523	137.349								134.643	44.5971	168.193	118.474	123.343
151.25	72.619	809.639	116.523	137.349								75.4808	46.381	488.554	111.069	140.964
313.125	90.7738	186.024	101.958	137.349								75.4808	48.3135	350.602	118.474	140.964
99.1667	107.738	182.53	101.958	138.554								75.4808	48.3135	488.554	126.936	140.964
79.6094	109.921	182.731	101.958	71.0843								75.3846	48.3135	403.614	126.936	123.343
79.6094	219.841	182.731	101.958	71.0843								63.2812	46.3333	403.614	126.936	140.964
79.6094	202.679	182.731	101.958	71.0843								63.2812	44.5513	137.349	110.241	140.964
74.9265	202.679	182.731	101.958	71.0843								63.2812	50.3623	148.193	102.892	164.458
79.6094	171.032	186.265	101.958	71.0843								67.5	54.7052	127.022	96.4608	140.964
278.75	114.021	155.221	101.883	71.0843								67.5	52.2186	127.022	96.4608	164.458
193.75	146.599	155.221	101.883	71.0843								67.5	49.9482	279.92	96.4608	123.343
145.312	516.667	155.221	116.437	70.4819								67.5	47.9167	279.92	96.4608	98.6747
116.25	516.667	155.221	125.394	70.4819								75.3846	52.2727	279.92	96.4608	98.6747
87.9464	258.333	155.221	125.394	69.8795								405	49.9482	280.321	96.4608	109.505
87.8571	172.222	155.02	125.394	69.8795								489.375	49.9482	280.321	96.4608	109.505
95.2273	172.222	155.02	118.173	69.8795								182.292	52.2186	420.482	96.4608	109.505
191.042	103.333	155.02	109.082	69.8795								157.083	60.4637	420.482	85.743	109.505
94.6154	85.9127	155.02	101.291	69.8795								72.9167	67.577	420.482	86.6836	197.108
82.0833	86.1111	155.02	94.5382	69.8795								68.3594	77.7211	420.482	86.6836	164.257
82.0833	73.8095	132.874	98.0422	69.8795								68.3594	90.7738	420.482	86.6836	123.193
87.9464	86.1111	132.874	98.0422	139.759								68.3594	99.026	420.482	82.3494	123.193
88.0357	86.1111	132.874	104.578	139.759								68.3594	91.8651	420.482	78.428	140.792
88.0357	86.1111	132.874	104.578	138.554								68.3594	100.216	232.53	78.428	167.952
82.1667	86.1111	132.874	108.15	138.554								72.9167	100.216	232.53	78.4854	164.056
82.1667	103.333	132.702	108.15	138.554								72.9167	100.216	186.024	78.4854	164.056
87.9464	103.333	132.702	108.15	138.554								78.125	91.8651	186.024	78.4854	196.867
87.9464	258.333	132.702	108.15	138.554								109.375	91.8651	186.265	82.4096	196.867
87.9464	172.222	154.819	108.15	138.554								265.625	84.7985	186.506	82.4096	196.867
87.9464	171.825	154.819	114.834	138.554								326.25	78.7415	186.506	86.747	196.988
87.9464	41.2257	462.651	114.834	138.554								121.25	78.7415	233.133	86.747	212.048
88.0357	41.2257	708.434	114.834	138.554								99.2045	84.707	233.133	82.4096	197.289
88.0357	39.7534	308.434	114.834	138.554								83.9423	100.108	281.124	78.4854	164.056
94.8077	41.2257	231.325	114.834	138.554								72.75	157.313	801.205	78.4854	123.042
94.7115	41.2257	200.241	102.075	138.554								83.9423	350	801.205	77.0561	131.526
94.7115	41.2698	143.029	96.7026	137.349								247.5	175	160	77.0561	161.446
102.708	43.8492	92.1687	91.9277	137.349								83.1731	175	114.286	73.8454	164.056
101.979	44.5714	92.1687	87.5502	138.554								72.0833	175	160.241	73.8454	109.371
101.979	44.5714	92.1687	91.9277	138.554								83.1731	131.399	266.265	73.8454	98.4337
83.8333	52.619	86.0241	96.7026	138.554								72.1667	90.873	266.667	77.0561	89.4852
101.979	73.2993	86.0241	108.079	138.554								67.6562	125.893	160	73.8454	89.4852
102.083	46.4286	86.0241	108.079	138.554								72.1667	193.333	159.759	73.8454	89.4852
94.1346	93.2234	92.0826	114.834	138.554								303.75	193.333	199.699	77.0561	82.0281
101.979	46.6117	92.0826	96.7026	138.554								134.643	80.9524	399.398	77.0561	122.892
90.2679	52.8571	92.0826	91.8675	137.349								90.2083	113.69	798.795	77.0561	93.7082
102.083	48.0519	92.0826	91.8675	137.349								83.2692	159.722	604.819	73.8454	81.9277
142.5	42.8095	92.0826	108.079	137.349								90.2083	185.714	265.863	71.7129	81.9277
162.857	45.1007	85.9438	122.49	137.349								108.75	185.714	265.863	82.4699	89.3757
102.083	46.627	85.9438	122.49	137.349								104.722	123.81	265.863	86.8104	81.9277
87.6923	48.6542	85.9438	141.335	71.0843								90.3125	111.31	398.795	86.8104	81.9277
103.523	48.6542	85.9438	131.239	71.0843								83.3654	111.31	159.518	91.6332	82.0281
81.75	50.8658	85.9438	122.49	71.0843								83.3654	111.31	130.293	215.491	75.7183
72.2059	53.288	85.9438	122.49	71.0843								83.2692	101.19	130.637	146.878	89.4852
70.4167	53.3447	55.9979	141.335	71.0843								83.2692	123.677	130.637	179.518	75.7183
76.7188	53.3447	53.6647	183.735	71.0843								83.2692	123.677	130.637	377.108	75.7183
76.7188	58.7302	80.497	204.15	70.4819								90.2083	159.014	91.4458	377.108	82.0281
76.7188	58.8095	80.497	183.735	70.4819								90.2083	159.014	101.606	377.108	75.6256
74.5588	48.7578	80.497	229.669	69.8795								98.4091	501.786	130.637	215.491	81.9277
76.7188	40.5583	80.497	262.478	69.8795								98.5227	379.762	130.637	167.604	75.6256
81.9167	40.5583	80.5723	262.478	69.8795								90.3125	200.952	130.637	167.604	75.6256
211.75	40.5583	80.5723	262.478	69.8795								98.4091	125.595	130.637	188.554	75.7183
141.25	40.5583	80.5723	165.462	69.8795								98.4091	59.9206	152.41	167.604	75.7183
198.542	40.5993	80.497	165.462	69.8795								120.417	49.026	159.518	167.604	75.7183
170.179	42.0918	80.497	148.193	69.8795								74.9107	49.026	138.353	188.554	82.0281
189.167	42.0918	80.497	148.193	69.8795								74.9107	49.026	138.353	215.491	70.3098
70.6944	42.0918	80.497	118.554	138.554								74.9107	49.026	284.337	251.406	70.3098
70.6944	42.0918	80.497	118.554	138.554								74.9107	49.026	152.209	251.406	70.3098
70.6944	43.6508	80.497	118.313	138.554								75.3846	46.8944	421.084	301.687	70.3098
70.6944	40.6404	80.497	118.313	138.554								75.3846	104.048	244.578	301.687	70.3098
70.6944	40.6404	85.9438	118.313	138.554								75.3846	600	198.072	301.687	70.2238
74.8529	40.6404	92.0826	118.313	138.554								75.3846	61.9048	350.602	377.108	70.2238
74.8529	40.6404	85.9438	147.892	138.554								75.3846	62.1849	403.614	251.406	70.2238
74.9265	43.6508	85.9438	147.892	138.554								98.125	74.5238	403.614	301.687	70.2238
74.9265	43.6949	107.43	147.892	138.554								89.2045	62.1032	403.614	188.554	82.0281
79.6094	42.1344	92.0826	118.313	138.554								75.4808	70.068	137.349	188.404	82.0281
104.318	42.1344	75.8327	118.313	137.349								75.4808	61.3095	177.59	215.318	82.0281
313.125	43.6949	80.5723	118.313	137.349								81.7708	46.9742	127.022	215.318	82.0281
106.146	45.3755	80.6476	147.892	137.349								72.3214	49.0683	127.022	414.859	82.0281
74.9265	45.3755	75.9036	147.892	138.554								67.5	69.494	419.88	215.318	89.4852
74.9265	43.6949	83.4538	149.398	138.554								63.2812	69.494	279.92	215.318	89.3757
79.6094	51.294	75.9745	153.012	138.554								67.5	65.4062	280.321	215.318	89.3757
79.6094	49.6894	71.7537	156.627	138.554								67.5	58.5213	280.321	502.41	81.9277
79.6094	54.4218	71.7537	114.834	138.554								67.5	58.5213	286.747	1092.77	86.988
79.3333	60.1504	254.819	114.834	138.554								67.5	55.6548	573.494	364.257	164.458
296.875	58.9286	509.639	114.834	138.554								68.2812	58.584	573.494	376.807	213.253
229.688	65.4101	107.229	131.239	137.349								68.2812	83.8828	573.494	165.06	119.621
136.964	73.5119	107.229	126.248	71.0843								121.389	72.6984	573.494	208.635	141.136
87.8571	61.9048	809.639	135.959	71.0843								364.583	72.6984	310.04	232.048	197.349
87.9464	58.8095	269.88	135.959	71.0843								84.1346	90.873	310.04	165.422	164.458
150.893	57.9365	186.265	135.959	71.0843								78.125	83.7912	420.482	150.383	140.964
102.5	67.5926	186.265	126.248	70.4819								109.375	47.3602	280.321	150.383	140.964
94.6154	67.6587	186.265	123.408	70.4819								72.9167	60.5159	280.321	197.456	123.343
143.281	64.0977	186.265	123.322	70.4819								64.3382	60.5159	232.53	177.711	123.343
94.8077	69.2577	186.265	123.322	69.8795								68.3594	54.4643	232.53	148.092	109.639
88.0357	113.571	186.265	120.297	69.8795								68.3594	51.8707	232.831	148.092	123.343
88.0357	99.026	155.221	111.704	69.8795								68.3594	47.3602	233.133	136.701	140.964
82.1667	108.929	155.221	107.831	69.8795								68.3594	49.4589	233.133	118.474	109.639
87.9464	142.007	155.221	107.831	69.8795								72.9167	46.381	233.133	111.069	123.343
87.9464	124.256	155.221	107.831	69.8795								72.9167	44.5971	281.124	111.069	109.639
87.9464	109.921	155.02	107.831	69.8795								78.125	48.3135	281.124	118.474	98.6747
87.9464	164.881	155.02	120.297	69.8795								84.2308	48.3135	281.124	126.936	98.6747
87.9464	162.143	155.02	120.297	69.8795								203.125	48.3135	801.205	126.936	109.505
87.9464	162.143	155.02	116.523	138.554								177.083	44.5513	200.301	111.069	98.5542
88.0357	162.143	155.02	101.958	138.554								139.821	44.5513	267.068	98.6446	98.5542
88.0357	270.238	186.024	101.958	138.554								83.9423	52.6515	267.068	90.7867	123.193
94.8077	256.548	132.874	101.958	138.554								77.9464	54.7052	801.205	85.743	140.792
94.7115	516.667	132.874	101.958	138.554								77.9464	52.2186	400.602	85.743	123.193
94.7115	516.667	132.874	101.958	138.554								72.75	54.7052	160	90.7867	98.5542
94.7115	129.167	132.874	101.958	138.554								83.9423	47.9167	266.667	102.892	109.505
94.8077	258.333	132.702	101.883	137.349								428.75	52.2727	400	96.4608	123.193
261.25	129.167	132.702	101.883	137.349								108.125	49.9482	800	96.4608	123.042
135.972	103.333	132.702	108.675	138.554								98.2955	45.9524	800	96.4608	164.056
111.25	85.9127	132.702	116.437	138.554								98.2955	52.2186	800	96.4608	164.056
102.083	73.6395	154.819	116.437	138.554								72.1667	63.8228	798.795	90.7867	196.867
111.364	73.8095	154.819	116.437	138.554								67.5781	67.577	265.863	85.743	196.867
111.364	73.8095	708.434	116.437	138.554								128.393	72.5397	265.863	86.6836	196.867
122.5	73.8095	462.651	118.173	138.554								314.167	90.7738	159.518	86.6836	140.62
102.083	73.8095	231.325	101.291	138.554								122.344	106.085	199.699	82.3494	109.371
102.083	73.8095	231.325	101.291	138.554								97.875	136.395	130.465	78.428	123.042
103.636	84.3537	128.916	98.0422	137.349								88.9773	110.238	130.465	78.4854	164.056
103.636	172.222	92.0826	98.0422	71.0843								122.344	100.216	91.3253	78.4854	122.892
103.636	258.333	92.1687	108.009	71.0843								94.25	100.216	130.465	78.4854	400.602
126.528	129.167	99.2586	98.0422	71.0843								81.6667	91.8651	130.465	82.4096	200.301
113.875	85.9127	86.0241	104.578	70.4819								81.6667	91.8651	114.157	84.5095	122.892
94.4231	51.6071	86.0241	108.15	70.4819								83.3654	84.7985	130.637	80.6681	98.4337
81.8333	41.2257	86.0241	108.15	70.4819								83.2692	84.7985	130.637	84.5095	123.042
76.7188	41.2257	92.0826	108.15	69.8795								83.2692	84.7985	130.637	84.5095	89.4852
70.4167	39.7534	92.0826	108.15	69.8795								83.2692	68.8988	130.637	78.4854	89.4852
72.2059	39.7534	92.0826	108.15	69.8795								83.2692	68.8244	130.637	78.4854	82.0281
74.5588	41.2257	92.0826	114.834	69.8795								90.2083	84.707	130.637	78.4854	82.0281
76.7188	41.2698	92.0826	114.834	69.8795								90.2083	350	159.518	80.6134	89.4852
76.7969	47.8355	85.9438	122.49	69.8795								90.2083	175	176.386	80.6134	82.0281
76.7188	55.042	85.9438	114.834	69.8795								90.3125	175	220.482	73.8454	81.9277
102.292	41.5435	92.0826	114.834	69.8795								90.3125	175	808.434	73.8454	81.9277
111.591	47.0476	85.9438	114.834	69.8795								108.25	146.769	244.277	73.8454	81.9277
111.591	53.458	85.9438	108.079	69.8795								98.4091	77.9762	150.43	77.0561	81.9277
119.25	48.381	85.9438	87.4928	69.8795								98.4091	99.1342	325.703	73.8454	81.9277
175.25	52.1709	75.7619	91.9277	138.554								120.417	160.119	287.149	73.8454	81.9277
127.375	44.8854	80.497	96.7026	138.554								196.25	263.095	287.149	73.8454	75.7183
74.9265	48.6472	75.7619	108.079	138.554								89.2045	263.095	215.361	77.0561	82.0281
70.7639	46.7419	75.7619	108.079	138.554								75.4808	80.9524	147.992	74.9726	82.0281
70.6944	50.9637	75.8327	114.834	138.554								75.4808	136.905	148.193	73.8454	82.0281
70.6944	50.9637	80.5723	114.834	138.554								75.3846	159.184	148.193	73.8454	75.7183
70.6944	46.5321	80.5723	108.079	138.554								75.3846	139.286	572.289	82.4699	75.7183
70.6944	46.627	80.5723	96.7026	137.349								75.3846	111.429	280.321	86.8104	75.7183
70.6944	48.6542	85.9438	87.4928	138.554								75.3846	101.19	280.321	86.8104	75.6256
70.6944	48.6542	85.9438	108.079	138.554								75.3846	101.19	286.747	86.8104	75.6256
74.9265	50.8658	80.5723	122.49	138.554								75.4808	101.19	573.494	301.687	75.6256
79.6094	55.9524	80.497	122.49	138.554								81.7708	101.19	573.494	215.491	75.6256
74.9265	53.288	80.497	122.49	138.554								81.7708	123.677	310.04	201.958	75.6256
70.7639	53.3447	128.795	122.49	138.554								89.2045	123.677	232.53	201.958	75.7183
66.9737	66.0714	91.9966	122.49	138.554								94.25	159.014	573.494	377.108	70.3098
79.5312	78.3883	85.8635	122.41	71.0843								72.3214	159.014	573.494	301.687	70.3098
521.25	52.8571	92.0826	131.153	70.4819								67.5	334.921	397.59	215.491	70.3098
74.9265	43.5626	99.1659	141.335	70.4819								67.5	317.857	280.321	188.554	70.3098
74.9265	40.5583	85.9438	141.335	70.4819								63.2812	143.537	280.723	167.604	70.3098
79.6094	40.5583	75.8327	141.335	69.8795								67.5	92.9563	280.723	167.604	70.3098
79.6094	42.0068	92.0826	153.112	69.8795								67.5	82.967	233.133	167.604	70.2238
79.6094	42.0493	80.5723	183.614	69.8795								67.5	60.5042	233.133	150.843	70.2238
79.6094	42.0918	71.6198	204.016	69.8795								68.2812	51.3605	281.124	150.843	70.2238
79.6094	42.0918	85.9438	204.016	69.8795								68.2812	49.026	281.124	167.604	81.9277
922.5	42.0918	75.9036	229.518	69.8795								72.8333	49.026	210.843	301.687	82.0281
26.25	42.0918	75.9036	229.518	69.8795								91.1458	49.026	801.205	251.406	82.0281
479.375	40.6404	89.4148	229.518	69.8795								91.1458	49.026	801.205	377.108	82.0281
150.893	40.6404	75.9745	229.518	69.8795								109.375	226.488	160.241	377.108	82.0281
114	40.6404	71.7537	165.462	69.8795								99.4318	416.667	267.068	251.406	82.0281
114	40.6404	71.7537	165.462	69.8795								91.1458	132.143	400.602	251.406	89.3757
103.636	40.6404	71.7537	118.554	69.8795								78.125	88.0952	801.205	251.406	89.3757
102.604	42.0918	254.819	148.193	139.759								72.8333	58.7719	400.602	188.554	89.3757
87.9464	43.6949	509.639	148.193	138.554								84.1346	65.6863	133.534	188.554	314.458
88.0357	43.6949	405.422	118.554	138.554								72.9167	65.6863	160	167.604	164.659
88.0357	43.6949	405.422	118.554	138.554								68.3594	57.8042	800	167.604	197.59
87.9464	43.6949	193.976	118.313	138.554								68.3594	61.2045	800	167.604	263.454
87.9464	43.6949	387.952	118.313	69.8795								68.3594	46.9246	800	215.318	164.458
87.9464	40.6814	404.819	118.313	69.8795								68.3594	46.9246	800	188.404	140.964
87.9464	42.1344	232.831	118.313	69.8795								72.9167	61.7725	606.024	188.404	164.458
87.9464	62.0927	186.265	118.313	69.8795								72.9167	65.4062	266.265	215.318	140.964
87.9464	49.6894	186.265	118.313	69.8795								78.125	69.494	146.787	1091.57	123.343
87.9464	51.9481	186.265	118.313	69.8795								72.9167	74.127	176.145	1091.57	123.343
88.0357	60.1504	186.265	118.313	69.8795								68.4375	61.7725	152.209	502.41	123.343
88.0357	65.9664	232.831	147.892	69.8795								91.25	53.0045	130.465	231.153	98.6747
88.0357	95.671	186.265	147.892	69.8795								108.75	53.0045	130.465	231.153	109.639
87.9464	84.0136	155.221	147.892	69.8795								99.2045	58.584	130.465	135.049	123.343
94.7115	65.3439	155.221	152.41	69.8795								121.25	72.6984	130.465	123.795	98.6747
94.7115	61.9048	155.02	153.012	69.8795								83.9423	68.1548	114.157	148.193	109.639
94.8077	69.1877	186.024	153.012	69.8795								77.9464	104.762	130.465	150.383	197.349
136.944	71.5686	155.02	156.627	69.8795								72.75	136.161	130.637	150.383	109.639
140	67.6587	155.02	147.289	139.759								72.75	51.8707	130.637	165.422	98.6747
140	67.6587	155.02	126.248	69.8795								428.75	47.3602	138.554	197.456	279.518
122.5	73.5863	155.02	135.959	69.8795								216.25	54.4643	130.637	136.701	123.193
111.364	84.0986	132.874	126.248	69.8795								102.5	45.3869	130.637	118.474	109.505
111.364	90.5678	132.874	126.248	69.8795								299.583	57.3308	138.353	118.474	123.193
114	116.534	132.874	123.322	69.8795								449.375	60.5159	176.386	118.474	109.505
114	102.041	132.874	123.322	69.8795								117.812	48.3631	284.337	111.069	164.257
103.636	142.007	132.702	123.322	69.8795								97.875	46.381	669.88	104.536	109.505
103.636	131.905	132.702	123.322	69.8795								122.344	44.5971	269.076	104.536	109.505
94.8958	162.143	132.702	104.257	69.8795								117.812	48.3135	403.012	111.069	109.505
113.875	135.119	154.819	107.831	69.8795								134.643	50.4141	287.149	126.936	123.042
126.528	115.816	154.819	107.831	69.8795								81.6667	46.381	221.988	118.474	164.056
122.625	115.816	154.819	107.831	69.2771								83.3654	44.5513	177.59	98.7282	200
111.591	135.119	462.651	107.831	46.5863								83.3654	44.5513	147.992	83.0691	226.104
102.292	181.845	231.325	123.236	46.5863								83.2692	46.3333	147.992	85.743	246.084
76.7188	242.46	231.325	116.523	69.8795								83.2692	46.3333	147.992	85.8099	196.867
76.7188	172.222	117.196	116.523	69.8795								83.2692	50.3623	172.048	85.8099	123.042
76.7188	145.476	92.0826	108.755	69.8795								83.2692	50.3623	210.843	85.8099	123.042
76.7969	172.222	99.2586	108.755	69.2771								83.2692	50	573.494	85.8099	140.62
74.9265	129.167	128.916	108.755	69.2771								90.2083	50	573.494	90.8575	196.867
76.7188	103.333	99.1659	101.958	69.2771								90.2083	49.9482	279.92	90.8575	400.602
111.591	84.0136	86.0241	101.883	69.2771								90.2083	47.8671	279.92	90.8575	120.138
102.292	85.9127	86.0241	101.883	138.554								90.3125	49.9482	310.04	96.5361	120.138
106.146	73.6395	107.43	101.883	138.554								90.3125	82.0578	419.88	96.4608	105.12
106.042	73.6395	92.0826	116.437	138.554								98.4091	120.899	839.759	81.2302	89.3757
74.8529	73.6607	92.0826	116.437	138.554								98.4091	180.714	419.88	82.3494	98.3133
106.146	73.6607	92.0826	116.437	138.554								98.4091	153.81	839.759	91.4993	89.4852
115.795	73.8095	92.0826	108.675	138.554								98.5227	190.952	572.289	85.8099	82.0281
74.9265	98.4127	85.9438	101.883	138.554								120.278	136.395	280.723	78.4854	82.0281
70.7639	129.167	99.1659	101.883	138.554								942.5	91.8651	280.723	80.7229	82.0281
70.6944	258.333	89.1566	109.082	138.554								188.5	84.7985	281.124	80.7229	82.0281
70.6944	86.1111	91.9966	118.173	138.554								81.7708	122.487	281.124	78.4854	82.0281
70.6944	73.8095	85.8635	101.291	138.554								75.4808	122.487	281.124	84.5095	81.9277
70.6944	51.1338	80.497	104.578	138.554								75.3846	84.7985	210.843	80.6681	81.9277
70.6944	42.7656	80.497	108.009	43.3735								75.3846	84.7985	210.843	84.5095	81.9277
70.6944	39.7109	80.5723	102.008	43.3735								75.3846	84.7985	801.205	84.5095	81.9277
79.6094	39.7534	75.8327	108.009	43.3735								75.3846	73.4921	400.602	84.5095	81.9277
74.9265	39.7534	80.5723	104.578	43.3735								75.4808	68.8988	400.602	80.6681	89.3757
74.9265	37.5744	80.5723	108.15	43.3735								81.7708	68.8988	400.602	82.4096	82.0281
67.0395	41.2257	80.5723	102.142	43.3735								81.7708	73.4127	801.205	80.6134	82.0281
63.6875	49.4048	80.5723	108.15	43.3735								98.125	68.8244	801.205	80.6134	82.0281
74.8529	116.964	80.5723	108.15	43.3735								104.722	80.7692	801.205	84.4521	82.0281
573.125	65.3439	85.9438	108.079	44.5783								81.6667	116.667	400	80.6134	75.7183
74.9265	53.458	85.9438	102.075	43.3735								72.3214	105	800	80.6134	75.7183
74.9265	43.2381	85.9438	108.079	43.3735								67.5	95.4545	800	80.6134	75.7183
74.9265	40.0935	80.497	114.834	44.5783								67.5	80.7692	800	77.0561	75.7183
90.9821	39.5337	117.087	114.834	43.3735								67.5	146.769	800	77.0561	75.7183
79.6094	46.6117	139.458	114.834	43.3735								68.2812	117.113	800	73.8454	75.6256
79.6094	45.6667	85.8635	114.834	43.3735								68.2812	70	400	73.8454	75.6256
79.6094	47.5694	85.8635	114.834	43.3735								68.3594	78.9377	199.699	77.0561	75.6256
79.6094	45.6667	89.0562	108.079	43.3735								91.1458	90.5844	266.265	78.5427	70.2238
191.75	51.8939	85.7612	96.7026	43.3735								84.1346	106.548	199.699	78.5427	70.3098
114	47.5694	99.1659	91.8675	43.3735								91.1458	191.667	130.465	77.0561	70.3098
114	46.5774	85.9438	102.075	43.3735								91.1458	130.238	130.465	80.5586	70.3098
150.893	48.6542	85.9438	108.079	43.3735								84.1346	123.677	130.465	78.5427	70.3098
102.604	46.627	71.6198	122.49	43.3735								99.4318	92.7579	130.465	82.5301	70.3098
94.7115	46.627	75.8327	131.239	43.3735								99.4318	85.6227	130.465	82.4699	65.6225
87.9464	48.6542	83.4538	114.834	43.3735								72.8333	85.6227	130.465	150.843	65.5422
87.9464	53.288	75.9036	114.834	43.3735								68.2812	123.677	130.465	179.518	75.6256
87.9464	53.288	75.9036	114.834	43.3735								78.125	139.137	130.465	134.639	75.6256
87.9464	53.288	89.4148	108.079	43.3735								78.125	111.31	130.465	107.711	81.9277
87.9464	72.7891	83.4538	122.49	43.3735								68.3594	159.014	138.554	124.282	81.9277
87.9464	101.905	71.7537	131.239	43.3735								68.3594	167.46	138.554	251.406	82.0281
87.9464	52.8571	71.7537	131.239	43.3735								68.3594	190.476	138.554	215.491	82.0281
87.9464	42.0068	71.7537	122.41	43.3735								72.9167	92.9563	138.554	215.491	82.0281
87.9464	43.5626	932.53	122.41	43.3735								78.125	51.3605	133.735	215.491	82.0281
88.0357	39.2063	466.265	131.153	44.5783								78.125	51.3605	284.337	188.554	89.4852
88.0357	36.756	466.265	141.242	43.3735								72.9167	49.026	133.735	167.604	122.892
88.0357	39.246	466.265	141.242	43.3735								68.3594	49.026	133.735	167.604	261.446
88.0357	42.0493	422.892	131.153	43.3735								68.4375	49.026	804.819	150.843	149.699
87.9464	42.0918	387.952	141.242	43.3735								73	49.026	804.819	188.554	173.494
94.7115	42.0918	931.325	166.922	43.3735								980	49.026	668.675	251.406	197.59
94.7115	43.6508	931.325	183.614	43.3735								136.562	74.5238	286.747	301.687	197.349
102.708	42.0918	931.325	204.016	42.1687								88.9773	68.2073	221.988	301.687	123.343
102.708	40.6404	310.442	204.016	43.3735								139.821	74.5238	147.992	251.406	140.964
175.893	40.6404	232.831	306.024	43.3735								122.344	65.6863	147.992	188.554	140.964
510	40.6404	232.831	229.518	43.3735								92.3864	62.037	172.048	188.554	123.343
114	40.6404	155.221	229.518	43.3735								72.6667	69.7917	147.992	188.554	123.343
114	40.6404	155.221	165.261	43.3735								72.6667	69.3651	241.365	215.491	140.964
114	42.0918	169.88	198.313	43.3735								72.75	59.2732	419.88	188.554	140.964
114	43.6949	120.482	118.554	43.3735								471.875	48.9648	419.88	167.604	123.343
94.3269	43.6949	465.06	118.554	43.3735								157.083	48.9648	419.88	167.604	98.6747
94.3269	43.6949	310.04	148.193	43.3735								104.722	49.0166	419.88	167.604	98.6747
102.188	42.1344	232.53	148.193	44.5783								108.75	53.6848	839.759	167.47	109.639
102.188	39.3254	132.874	118.554	43.3735								244.688	65.4062	839.759	167.47	98.6747
111.477	49.1567	132.874	118.554	43.3735								97.875	79.4218	419.88	188.404	98.6747
149.643	71.4286	155.02	118.313	43.3735								83.3654	61.7725	572.289	311.145	157.831
175.357	76.1905	186.024	118.313	43.3735								83.3654	53.0045	419.88	1091.57	140.964
111.591	87.9121	232.53	118.313	43.3735								83.3654	55.6548	572.289	753.614	112.737
94.4231	87.9121	155.02	118.313	43.3735								83.3654	58.584	573.494	376.807	131.727
81.8333	72.4603	155.02	118.313	43.3735								83.2692	68.1548	573.494	202.259	119.793
76.7969	87.6984	154.819	118.313	43.3735								83.2692	83.8828	421.084	202.259	109.505
74.9265	71.6387	154.819	118.313	43.3735								83.2692	160.417	281.124	269.679	98.5542
70.7639	60.8929	154.819	118.313	44.5783								83.2692	129.592	281.124	86.8104	123.193
74.9265	81.1905	154.819	147.892	44.5783								90.2083	51.8707	281.124	125.703	123.193
70.7639	98.0159	154.819	147.892	44.5783								90.2083	40.8289	281.124	118.554	109.505
70.7639	64.0351	154.819	147.892	43.3735								90.2083	42.3993	281.124	118.554	109.505
97.8846	69.2577	154.819	147.892	43.3735								90.2083	40.8289	281.124	127.022	123.193
79.5312	78.4921	449.398	152.41	43.3735								90.3125	44.0952	400.602	118.158	167.952
74.9265	73.5863	449.398	197.189	43.3735								90.3125	46.381	400.602	118.474	240.964
111.111	84.0986	231.325	147.892	43.3735								90.2083	44.5971	400.602	118.474	226.104
125	78.4921	184.337	147.892	43.3735								90.2083	39.9836	801.205	104.536	196.867
67.0395	90.873	143.373	126.248	43.3735								98.4091	41.4116	801.205	111.069	246.084
67.0395	94.0476	117.196	126.248	43.3735								98.4091	52.7056	801.205	104.536	140.62
70.7639	104.881	161.145	135.959	44.5783								120.417	52.7056	800	111.069	140.62
70.6944	131.905	125.151	126.248	43.3735								135.312	46.3333	800	104.536	196.867
70.6944	115.816	99.2586	126.248	43.3735								167.5	46.3333	800	98.7282	339.157
70.6944	136.429	107.53	123.322	43.3735								75.4808	44.5513	800	98.7282	123.042
70.6944	103.912	100.241	123.322	43.3735								75.4808	42.9012	800	104.536	109.371
74.9265	103.912	111.379	123.322	43.3735								75.4808	42.9012	800	104.536	93.4404
79.6094	103.912	105.572	123.322	43.3735								75.3846	50.3623	800	118.721	89.3757
79.6094	92.9894	93.842	104.257	43.3735								75.3846	52.6515	606.024	128.614	89.3757
74.9265	103.912	92.0826	107.831	43.3735								75.3846	54.7619	199.699	98.6446	89.4852
67.0395	121.23	92.0826	107.831	43.3735								81.7708	50	130.465	88.7952	89.4852
67.0395	121.23	99.1659	107.831	43.3735								89.2045	54.7052	130.465	88.8554	98.4337
79.5312	145.476	92.0826	107.831	43.3735								98.125	49.9482	130.465	93.532	82.0281
127.361	145.476	106.988	123.236	43.3735								104.722	67.577	130.465	85.8099	82.0281
524.375	129.167	85.8635	120.297	43.3735								94.125	136.012	130.465	85.8099	82.0281
286.562	84.0136	85.8635	135.944	43.3735								75.3846	136.012	130.465	85.8099	82.0281
85	84.0136	51.5181	108.755	43.3735								67.5	136.161	130.465	85.8099	81.9277
74.9265	73.5119	85.8635	108.755	43.3735								67.5	153.81	130.465	90.8575	89.3757
74.9265	73.6607	85.8635	108.755	43.3735								67.5	136.395	130.465	90.8575	81.9277
90.9821	84.1837	75.7619	101.958	43.3735								64.2647	106.085	138.554	85.8099	81.9277
79.6094	84.1837	80.497	101.883	43.3735								64.2647	103.423	138.554	90.8575	81.9277
79.6094	111.905	80.5723	101.883	44.5783								78.125	257.143	138.554	84.5668	81.9277
79.6094	118.095	80.5723	116.437	44.5783								78.125	304.762	207.831	84.5668	82.0281
79.6094	172.222	80.5723	116.437	43.3735								72.9167	150	133.735	82.4096	82.0281
79.6094	172.222	80.5723	116.437	43.3735								99.4318	95.4545	133.735	82.3494	82.0281
127.639	84.3537	85.9438	116.437	43.3735								91.1458	84.7985	133.735	84.5668	75.7183
102.604	41.1817	85.9438	108.221	43.3735								78.125	95.4545	133.735	80.7229	75.7183
111.932	41.1817	89.1566	96.8294	43.3735								470.625	84.7985	133.735	80.7229	75.7183
150.893	39.7109	140.361	101.883	43.3735								68.2812	73.4921	804.819	84.5095	75.7183
102.604	38.3826	159.839	101.291	43.3735								68.2812	73.4921	804.819	84.5095	75.7183
94.7115	38.3826	140.361	122.49	43.3735								72.9167	73.4921	286.747	84.5095	75.6256
94.7115	39.7534	85.8635	114.759	43.3735								84.1346	64.7759	286.747	84.5095	70.2238
94.7115	44.5238	85.8635	114.759	43.3735								78.125	80.7692	221.988	84.5095	70.2238
94.7115	64.0873	94.3373	114.759	43.3735								78.125	105	286.747	84.5095	70.2238
87.9464	59.0852	94.3373	108.009	44.5783								78.125	95.4545	241.365	80.6681	70.2238
87.9464	62.3677	93.5743	114.759	44.5783								78.125	95.4545	222.892	80.6134	70.3098
87.9464	50.7143	128.916	104.578	43.3735								99.4318	95.4545	133.735	80.6134	70.3098
87.9464	46.9979	107.43	92.275	43.3735								109.375	116.667	419.88	80.6134	70.3098
87.9464	41.5293	92.0826	102.142	43.3735								78.125	114.153	309.639	80.6134	70.3098
88.0357	47.5694	78.238	102.142	43.3735								72.9167	93.29	464.458	84.4521	65.6225
88.0357	47.5694	71.6867	108.15	43.3735								72.9167	73.2993	309.639	80.6134	65.6225
88.0357	45.6667	67.9138	96.7026	43.3735								84.1346	104.63	309.639	80.6134	75.6256
88.0357	45.6667	71.6867	96.7026	43.3735								218.75	106.548	309.639	80.6134	75.6256
88.0357	45.6667	67.9772	102.075	43.3735								156.25	170.476	309.639	77.1084	81.9277
88.0357	45.6667	71.7537	108.079	43.3735								84.0385	191.667	419.88	77.1084	81.9277
87.9464	45.6667	71.7537	114.834	43.3735								99.2045	111.19	572.289	77.1084	82.0281
87.9464	46.5774	71.7537	114.834	43.3735								122.344	111.31	573.494	80.6134	82.0281
94.7115	55.9524	71.7537	114.834	43.3735								108.75	92.7579	573.494	86.8104	82.0281
94.7115	48.6542	71.7537	122.49	43.3735								77.8571	92.7579	281.124	86.8104	82.0281
102.708	46.627	254.819	114.834	43.3735								72.6667	159.014	281.124	86.8104	82.0281
175.893	50.8658	310.843	108.079	43.3735								83.8462	159.014	281.124	78.5427	196.627
319.583	53.288	466.265	102.008	43.3735								99.0909	159.014	281.124	82.4699	181.928
114	53.288	466.265	108.079	43.3735								181.667	222.619	281.526	82.5301	77.1084
114	53.288	509.639	108.079	43.3735								90.4167	190.476	281.526	82.5301	140.964
114	72.7891	509.639	114.834	44.5783								90.4167	92.9563	400.602	91.6332	98.6747
94.3269	184.286	509.639	122.49	44.5783								157.083	89.881	400.602	86.8104	140.964
94.3269	59.9702	509.639	122.49	44.5783								471.25	51.3605	400.602	103.087	109.639
87.5893	40.5583	931.325	122.49	43.3735								154.821	49.026	400.602	97.0234	89.7043
94.3269	40.5583	465.663	122.49	43.3735								98.5227	51.3605	801.205	86.8104	98.6747
116.389	39.2063	931.325	122.49	43.3735								98.5227	46.8944	801.205	91.6332	123.343
116.389	35.6421	931.325	114.834	43.3735								83.3654	49.026	800	95.039	109.639
114.688	36.7932	465.663	114.759	43.3735								83.3654	49.026	800	134.639	109.639
114.375	42.0493	310.442	114.759	43.3735								83.2692	127.249	800	107.711	123.343
122.75	42.0918	310.442	122.41	43.3735								83.2692	57.2619	800	107.711	89.7043
102.292	42.0918	232.53	122.41	43.3735								83.2692	60.213	800	107.711	89.7043
87.6786	43.6508	186.024	131.153	43.3735								83.2692	69.7917	800	124.282	89.7043
76.7969	43.6508	186.024	141.242	43.3735								90.2083	93.0556	800	124.282	89.5947
74.9265	40.6404	310.04	141.242	43.3735								90.2083	139.583	399.398	167.47	89.7043
74.9265	40.6404	310.04	131.153	43.3735								90.2083	79.7619	130.465	215.318	87.6841
74.9265	40.6404	113.253	141.242	43.3735								90.2083	74.3197	130.465	215.318	112.737
70.7639	40.6404	232.53	166.922	43.3735								90.2083	69.3651	130.465	167.47	87.6841
70.7639	39.2857	132.874	183.614	43.3735								90.3125	46.9246	130.465	139.357	131.526
90.8929	43.6508	132.874	166.922	43.3735								90.3125	45.0476	130.465	150.843	131.526
74.9265	43.6949	186.024	183.614	43.3735								90.2083	46.9246	130.465	150.843	98.494
74.9265	43.6949	203.012	262.306	43.3735								90.2083	46.9246	130.465	167.604	82.1285
74.9265	43.6949	120.482	262.306	43.3735								98.4091	48.9648	130.465	224.578	82.1285
74.9265	43.6949	120.482	306.024	43.3735								98.4091	52.9478	138.554	224.578	89.5947
70.7639	42.1344	203.313	247.892	44.5783								108.375	61.7725	138.554	187.149	123.193
67.0395	51.9481	185.783	198.313	43.3735								154.643	55.6548	166.265	209.237	164.257
70.7639	76.1905	154.819	198.313	43.3735								180.417	58.584	207.831	215.491	123.193
70.6944	71.4286	163.511	197.189	43.3735								89.2045	53.0045	207.831	188.554	164.056
70.6944	87.9121	154.819	197.189	43.3735								81.7708	54.5238	133.735	167.604	240.964
74.8529	78.8889	154.819	198.554	43.3735								75.4808	68.1548	133.735	167.604	196.988
74.8529	71.6387	154.819	148.193	43.3735								75.3846	78.9683	133.735	167.604	140.62
74.9265	76.1161	154.819	118.554	43.3735								70	395.238	133.735	167.604	123.042
79.5	86.9898	449.398	118.313	43.3735								67.4167	83.7912	133.735	167.604	140.62
84.9167	218.333	224.699	118.313	43.3735								81.7708	50.3106	133.735	167.604	164.056
79.6094	342.857	166.667	118.313	44.5783								81.7708	44.5055	804.819	167.604	481.928
74.9265	150	161.295	118.313	44.5783								81.7708	42.3993	402.41	188.404	140.62
79.6094	95.2381	184.337	118.313	44.5783								104.722	40.8289	286.747	414.859	109.371
143.281	84.0986	184.337	118.313	44.5783								134.464	41.4541	286.747	502.41	98.4337
163.75	84.0986	166.867	118.313	44.5783								75.3846	44.6429	668.675	269.679	89.3757
163.75	84.0986	117.306	147.892	43.3735								67.5	44.5971	140.964	231.153	81.9277
85	78.4921	99.2586	147.892	43.3735								67.5	38.6508	142.169	231.153	81.9277
74.9265	84.1837	99.2586	147.892	43.3735								67.4167	41.4116	464.458	202.259	81.9277
67.0395	78.5714	143.201	147.892	43.3735								64.2647	57.9762	309.639	231.153	89.3757
84.9167	80.6122	136.386	147.892	43.3735								64.2647	56.7262	309.639	78.5427	86.988
90.9821	94.0476	262.048	147.59	43.3735								68.3594	50.3623	309.639	82.4699	89.4852
79.6094	94.2177	105.572	196.787	43.3735								78.125	48.2639	309.639	91.6332	82.0281
79.6094	101.339	94.4578	147.892	43.3735								78.125	48.2639	309.639	109.96	82.0281
79.6094	104.082	97.2618	147.892	43.3735								99.4318	42.9012	309.639	118.554	82.0281
79.6094	103.912	99.1659	295.783	43.3735								78.125	44.5513	419.88	118.554	82.0281
99.1667	101.19	85.9438	117.831	43.3735								68.3594	57.9167	572.289	118.554	84.3373
141.875	121.23	91.9966	135.959	43.3735								91.0417	57.5	573.494	111.069	81.9277
112.045	103.912	85.8635	126.248	43.3735								72.8333	57.5	421.687	98.7282	81.9277
102.604	104.613	85.8635	132.901	43.3735								72.8333	47.8671	281.124	98.7282	81.9277
123.125	90.9226	85.8635	132.808	43.3735								72.8333	60.4637	281.124	98.7282	75.6256
102.604	103.912	85.8635	123.322	36.747								72.9167	67.577	281.526	104.536	81.9277
94.7115	145.476	85.8635	123.322	36.1446								84.1346	181.349	281.526	98.7282	70.2238
94.7115	145.476	80.497	123.322	44.5783								78.125	301.19	281.526	93.532	70.3098
94.7115	145.476	85.8635	111.704	43.3735								78.125	121.032	400.602	93.532	75.7183
94.7115	121.23	80.497	107.831	43.3735								84.1346	121.032	400.602	93.532	82.0281
94.7115	103.333	80.497	107.831	43.3735								78.125	119.345	400.602	98.7282	75.7183
94.7115	84.0136	85.8635	115.02	43.3735								109.375	105	801.205	104.536	75.7183
94.7115	84.1837	85.9438	123.236	43.3735								99.4318	95.4545	801.205	103.389	75.7183
94.7115	98.2143	85.9438	123.236	43.3735								72.9167	112.566	801.205	118.721	75.6256
88.0357	98.2143	85.9438	120.297	43.3735								72.9167	770.238	800	118.394	70.2238
88.0357	98.2143	97.2618	108.835	43.3735								72.9167	83.5165	800	88.7952	65.5422
88.0357	118.095	213.976	108.835	43.3735								136.719	95.4545	800	93.532	70.2238
88.0357	182.143	111.807	108.835	44.5783								156.25	95.4545	800	93.532	70.2238
88.0357	147.619	82.2057	101.958	44.5783								218.75	84.8901	800	93.532	70.3098
88.0357	98.4127	85.8635	101.958	44.5783								91.1458	72.619	800	85.8099	70.3098
88.0357	45.7039	76.3339	101.958	43.3735								68.2812	77.4603	400	85.8099	70.3098
87.9464	41.1817	89.0562	101.958	43.3735								78.0357	78.8265	130.293	86.747	70.3098
87.9464	41.1817	82.2057	101.958	43.3735								121.25	80.7692	130.293	86.747	65.6225
87.9464	41.1817	89.0562	116.437	44.5783								121.25	80.8608	130.293	86.747	70.3098
87.9464	41.1817	89.0562	116.437	43.3735								77.8571	80.7692	130.293	88.7952	70.2238
94.8077	42.8114	84.2169	116.437	43.3735								72.6667	105	130.293	84.5668	70.2238
94.8077	54.4913	93.5743	108.675	43.3735								72.6667	105	130.465	80.7229	81.9277
153.906	67.8571	104.953	108.675	43.3735								83.8462	87.5	130.465	80.7229	81.9277
228.25	57.3593	83.4538	108.675	44.5783								99.0909	87.5	130.465	80.7229	82.0281
319.583	43.3087	73.6357	109.082	43.3735								181.667	95.4545	138.554	80.7229	82.0281
142.5	46.5168	71.6867	122.49	43.3735								451.25	102.738	166.265	80.7229	82.0281
114	78.7302	67.9772	122.41	43.3735								120.556	114.153	215.663	80.7229	82.0281
103.636	82.967	75.9745	122.41	43.3735								83.4615	102.619	266.265	77.1608	82.0281
94.3269	53.5119	71.7537	114.759	43.3735								83.4615	104.63	266.265	80.6681	240.361
94.3269	45.6667	71.7537	108.009	36.1446								235.625	104.63	133.735	84.5095	139.558
81.75	45.6667	71.7537	114.759	36.1446								134.643	121.769	133.735	84.5095	119.621
87.6786	43.9103	71.7537	104.578	36.1446								90.3125	136.735	133.735	84.5095	167.47
94.4231	43.9103	86.1044	92.3459	36.1446								90.3125	95.7143	804.819	84.5095	123.494
111.591	45.5908	154.618	102.075	36.1446								108.375	87.013	804.819	84.5095	82.2289
229.375	45.5908	466.265	102.142	35.5422								83.3654	95.7143	804.819	80.6681	109.639
166.25	45.5908	466.265	102.075	35.5422								83.2692	185.317	804.819	80.6134	100
114.625	47.5694	509.639	96.7026	35.5422								83.2692	277.976	804.819	84.4521	100
111.705	53.5714	509.639	96.7026	43.3735								83.2692	122.024	804.819	80.6134	98.5542
102.396	44.7619	509.639	96.7026	43.3735								83.2692	212.798	804.819	80.6134	89.5947
84.9167	46.627	509.639	96.7026	43.3735								83.2692	170.238	804.819	80.6134	98.5542
79.6094	48.6542	509.639	114.834	43.3735								90.2083	170.238	804.819	80.6134	82.1285
74.9265	50.8658	97.5904	114.834	43.3735								90.2083	143.75	419.88	80.6134	89.5947
79.6094	50.8658	809.639	114.834	43.3735								90.2083	170.476	309.639	80.6134	89.5947
90.8929	50.8658	232.53	114.834	43.3735								90.2083	92.9563	309.639	77.1084	89.5947
74.8529	56.0119	155.02	114.834	43.3735								90.2083	51.3605	309.639	77.1084	98.5542
70.7639	60.1852	132.874	114.759	43.3735								90.3125	51.3605	309.639	77.1084	123.193
70.7639	59.0226	132.874	114.759	43.3735								90.2083	51.3605	309.639	84.4521	131.526
63.6875	43.5626	186.024	108.079	44.5783								90.2083	49.026	419.88	82.4699	131.526
63.6875	43.5626	232.53	102.075	43.3735								90.2083	59.9206	573.494	86.8104	131.526
70.7639	47.0476	232.53	108.079	43.3735								98.4091	458.333	573.494	86.8104	82.0281
70.7639	37.9416	186.024	108.079	43.3735								98.4091	381.746	573.494	82.4699	70.3098
70.6944	36.756	186.024	114.834	43.3735								98.5227	104.113	421.687	82.4699	70.3098
70.6944	42.0918	270.683	131.239	44.5783								154.643	67.3669	281.124	82.5301	75.8109
74.8529	42.0918	270.683	131.239	43.3735								180.417	52.0022	281.124	82.5301	109.505
79.5312	43.6508	254.217	131.239	43.3735								216.5	71.503	281.526	91.7001	363.855
79.5312	43.6508	169.478	114.759	36.747								140.179	85.8974	281.526	86.8104	363.855
79.6094	43.6508	445.783	114.759	36.747								89.2045	93.0556	281.526	82.4699	262.651
79.6094	43.6508	154.819	114.759	43.3735								81.7708	80.0366	801.205	82.4699	112.565
74.9265	40.6404	154.819	114.759	36.1446								75.4808	86.7063	801.205	91.6332	123.042
74.9265	40.6404	154.819	114.759	36.1446								70	69.3651	801.205	97.0234	140.62
74.9265	40.6404	154.819	131.153	36.1446								63.2031	51.1905	801.205	97.0234	157.59
79.6094	40.6404	154.618	141.242	36.1446								67.5	48.9648	800	91.6332	604.819
88.1731	45.3297	154.618	131.153	36.1446								81.7708	48.9648	800	91.6332	196.867
95.5208	43.6949	154.618	141.242	36.1446								72.3214	46.9246	800	97.0234	109.371
81.875	43.6949	231.024	141.242	35.5422								104.583	48.2919	400	124.282	109.371
79.6094	42.1344	166.667	166.922	35.5422								134.464	50.487	800	134.639	81.9277
74.9265	43.6949	184.337	166.922	35.5422								98	65.6994	800	107.791	81.9277
70.7639	47.5694	184.819	166.922	43.3735								67.4167	68.1548	800	107.791	81.9277
74.9265	71.4286	185.06	166.922	43.3735								72.2321	57.3935	400	107.791	81.9277
97.9808	87.9121	184.819	204.016	43.3735								67.4167	57.3935	130.293	107.791	89.3757
84.9167	71.4286	143.029	262.306	43.3735								68.2812	54.5238	114.006	107.791	81.9277
79.6094	65.4101	117.306	262.306	43.3735								64.3382	64.1457	114.006	125.703	82.0281
79.6094	71.6387	107.53	247.892	43.3735								64.3382	94.7619	130.293	251.406	98.4337
79.5312	71.6387	119.277	198.313	43.3735								72.9167	601.19	101.339	251.205	82.0281
79.3333	71.6387	193.373	165.261	43.3735								91.1458	82.6531	114.006	188.404	82.0281
136.406	101.488	140.763	198.313	43.3735								91.1458	48.2143	130.293	150.723	82.0281
232.917	433.333	120.654	198.313	43.3735								68.3594	41.3265	130.293	150.723	82.0281
104.545	75	93.842	198.313	43.3735								72.9167	42.3993	138.554	137.021	75.6256
102.708	86.9898	97.2618	198.554	43.3735								72.8333	45.9325	166.265	137.021	75.6256
102.708	71.5686	85.9438	118.554	43.3735								68.2812	45.0476	199.699	166.609	75.6256
102.604	57.8798	99.1659	165.261	43.3735								72.8333	44.6429	166.265	187.149	75.6256
136.806	55.2489	91.9966	165.261	44.5783								72.8333	44.6429	166.265	187.149	75.6256
102.604	61.9674	85.8635	118.313	43.3735								72.8333	44.5971	134.94	179.346	70.2238
94.7115	83.8828	85.8635	118.313	43.3735								84.1346	46.381	804.819	209.237	75.6256
94.7115	83.8828	85.8635	118.313	43.3735								91.1458	52.7056	804.819	215.491	82.0281
94.7115	86.8132	85.8635	118.313	43.3735								91.1458	55.2154	804.819	150.843	82.0281
94.7115	93.9484	85.8635	118.313	36.1446								91.1458	59.7118	804.819	150.843	75.7183
94.7115	96.2302	85.8635	147.892	36.1446								91.1458	49.3271	804.819	167.604	70.3098
94.7115	105.556	85.8635	147.892	36.1446								72.9167	48.2639	804.819	167.604	70.3098
94.7115	91.0714	85.8635	147.892	36.1446								72.9167	48.2639	402.41	215.491	70.2238
94.8077	101.19	91.9966	147.892	36.1446								72.9167	48.2639	804.819	215.491	75.6256
88.0357	115.646	91.9966	147.892	36.1446								72.9167	105.303	804.819	215.491	70.2238
88.0357	101.19	85.9438	147.59	36.1446								78.125	77.8061	804.819	215.491	70.2238
88.0357	103.912	85.9438	147.59	35.5422								91.1458	57.5	402.41	248.916	70.2238
88.0357	104.613	85.9438	197.189	35.5422								109.375	60.4637	804.819	215.318	70.2238
88.0357	92.9894	89.1566	197.189	35.5422								91.1458	77.381	572.289	202.259	70.3098
88.0357	103.912	97.2618	295.783	43.3735								78.0357	90.2778	309.639	202.259	70.3098
88.0357	121.23	82.2984	110.467	43.3735								68.2812	120.899	309.639	202.259	75.7183
87.9464	145.476	82.2057	117.831	43.3735								68.2812	190.714	309.639	202.259	75.7183
87.9464	145.476	82.2057	144.076	43.3735								84.0385	119.388	419.88	269.679	75.7183
87.9464	145.476	82.2057	156.955	43.3735								139.821	131.25	420.482	323.614	70.3098
87.9464	145.476	82.2057	132.808	109.639								136.406	131.25	573.494	118.554	75.6256
88.0357	129.167	97.1522	123.322	44.5783								77.8571	116.667	573.494	118.554	81.9277
94.8077	117.857	84.2169	132.808	44.5783								72.6667	95.4545	573.494	111.069	81.9277
153.906	117.857	84.2169	123.322	43.3735								72.6667	413.69	573.494	104.536	82.0281
190.208	117.857	96.3855	120.389	43.3735								83.8462	107.887	422.289	98.7282	82.0281
228.25	98.2143	96.3855	104.337	44.5783								90.8333	77.551	281.526	93.532	82.0281
269.583	147.321	84.2169	107.831	43.3735								181.667	90.4762	281.526	104.536	82.0281
320	147.222	120.31	107.831	43.3735								95	78.8265	211.145	98.7282	82.0281
103.636	98.4127	125.181	107.831	43.3735								102.375	91.9643	574.699	93.532	188.755
94.3269	84.3537	96.2929	107.831	43.3735								90.4167	68.3473	801.205	93.532	179.819
94.3269	42.7656	83.4538	105.457	43.3735								83.4615	92.3611	800	93.532	286.747
87.5893	37.5744	75.9745	108.835	43.3735								98.6364	105	800	93.532	213.253
81.8333	36.3997	75.9745	108.835	43.3735								157.083	95.4545	800	93.532	159.94
87.6786	41.1817	75.9745	101.958	43.3735								120.417	80.7692	800	93.5954	120.181
94.4231	50.0567	86.1044	101.958	36.1446								90.3125	87.5	800	103.464	89.7043
94.4231	155.952	75.9745	101.958	36.1446								90.3125	105	400	136.701	82.2289
111.591	150.68	86.1044	101.958	36.1446								90.3125	105	400	133.457	109.639
100.729	55.1786	140.06	101.958	36.1446								83.2692	116.667	208.133	98.7282	89.5947
114.625	45.0176	509.639	101.958	36.1446								83.2692	80.7692	114.006	98.7282	82.1285
131.094	47.3901	466.265	101.958	36.1446								83.2692	87.5	114.006	93.532	89.5947
114.625	52.3313	466.265	116.437	36.1446								83.2692	114.153	130.293	88.8554	89.5947
102.396	53.6797	509.639	116.437	36.1446								83.2692	114.021	114.006	88.8554	89.5947
90.9821	74.5536	509.639	108.675	35.5422								83.2692	102.619	130.293	88.8554	109.505
90.9821	70.0794	509.639	108.675	43.3735								90.2083	104.63	130.293	86.747	109.505
90.9821	44.5933	404.819	108.675	43.3735								90.2083	104.63	130.293	86.747	140.792
90.9821	43.9103	232.53	131.239	43.3735								90.2083	106.548	166.265	84.5668	140.792
70.6944	43.9103	186.024	122.49	43.3735								90.2083	95.7143	202.008	84.5668	123.193
74.8529	43.9103	155.02	122.41	43.3735								90.3125	87.013	166.506	84.5668	89.5947
74.9265	45.5908	186.024	122.41	44.5783								90.2083	73.6264	166.506	80.7229	82.0281
70.7639	45.5908	186.024	131.153	43.3735								90.2083	87.013	166.265	80.7229	82.0281
70.7639	45.5908	155.02	114.759	43.3735								90.2083	119.792	134.94	80.7229	89.4852
70.7639	47.3443	203.012	114.834	43.3735								90.2083	159.722	134.94	80.7229	109.371
67.0395	51.0204	203.012	114.834	44.5783								90.2083	159.722	804.819	80.7229	140.62
67.0395	44.7619	270.683	108.079	44.5783								98.4091	159.722	804.819	80.7229	196.867
67.0395	49.256	270.683	102.075	43.3735								98.5227	159.722	804.819	77.1608	120.482
66.9737	47.2857	254.217	102.075	43.3735								154.643	170.238	804.819	80.6681	161.145
74.8529	48.6542	387.952	102.075	43.3735								180.417	159.921	804.819	80.6681	214.859
74.8529	48.6542	232.229	96.7026	36.1446								180.417	119.94	804.819	80.6681	131.325
74.8529	50.8658	154.819	96.7026	36.1446								216.5	51.3605	402.41	80.6681	140.62
74.9265	56.0119	154.819	96.7026	36.1446								347.5	49.026	804.819	80.6681	214.859
74.9265	57.0175	154.618	96.7026	36.1446								117.656	49.026	804.819	80.6681	196.988
70.7639	43.1319	154.618	96.7026	36.1446								81.7708	56.7669	804.819	80.6681	262.651
70.7639	40.5583	154.618	108.079	36.1446								81.6667	852.381	804.819	77.1608	98.494
74.9265	40.5583	154.618	114.834	36.1446								65.3333	297.619	803.614	77.1084	98.4337
74.9265	42.0068	154.618	114.834	35.5422								63.2031	95.4365	572.289	77.1084	82.0281
70.7639	37.9416	231.024	114.834	43.3735								70.0893	88.0952	464.458	77.1084	105.271
70.7639	40.5583	166.667	114.759	43.3735								65.4167	81.7177	309.639	77.1084	93.5743
70.7639	40.6404	184.819	114.759	21.6867								63.2812	95.3373	420.482	80.6134	89.3757
74.9265	43.6508	184.819	114.759	43.3735								59.4853	104.048	420.482	80.6134	81.9277
63.6875	43.6508	184.819	108.079	43.3735								67.4167	74.4444	573.494	80.6134	81.9277
70.7639	45.3297	308.032	108.079	44.5783								77.7885	69.7917	573.494	80.6134	82.0281
79.6094	43.6508	308.032	108.079	44.5783								104.583	80.0366	573.494	77.1084	98.494
84.9167	45.3297	308.032	122.49	43.3735								91.9318	74.3197	573.494	77.1084	82.0281
79.6094	45.3297	231.024	131.239	43.3735								84.2708	61.7063	281.526	78.5427	75.7183
79.6094	42.0918	144.578	131.239	43.3735								64.2647	51.1905	281.526	82.4699	75.7183
79.6094	40.6404	128.916	131.153	44.5783								64.3382	65.3361	168.916	86.8104	75.7183
79.6094	43.6508	120.654	122.41	44.5783								78.125	52.8912	267.871	86.8104	75.7183
108.068	69.3277	105.572	114.759	43.3735								91.1458	48.2919	801.205	86.8104	75.6256
117.361	45.3755	93.842	114.759	43.3735								84.1346	48.2919	801.205	86.8104	75.6256
143.214	43.6949	106.988	114.759	43.3735								84.1346	70.0794	801.205	82.4699	75.6256
115.125	42.1344	106.988	131.153	44.5783								91.1458	94.7619	800	82.5301	75.6256
104.659	57.0833	106.988	122.41	44.5783								68.2812	72.6984	800	86.8738	81.9277
104.545	51.8939	107.329	122.41	36.1446								72.8333	68.1548	800	91.7001	75.6256
104.545	67.2269	85.8635	131.153	36.1446								72.8333	57.3935	400	97.0234	82.0281
102.708	87.7976	85.8635	131.153	36.1446								72.8333	57.3935	400	91.6332	82.0281
102.708	87.9121	85.8635	141.242	36.1446								72.8333	68.1548	400	103.087	75.7183
136.944	65.9664	85.8635	141.242	36.1446								72.8333	160.417	400	109.96	70.3098
136.944	86.9898	85.8635	141.242	36.1446								78.125	139.966	114.006	103.087	70.3098
126.667	81.1905	85.8635	141.242	35.5422								78.125	50.3106	130.293	82.4699	75.7183
102.604	76.1161	85.8635	156.386	43.3735								84.1346	41.3265	130.293	82.4699	75.6256
94.7115	176.905	85.8635	173.762	43.3735								72.9167	41.3265	97.1084	86.8104	70.2238
94.7115	109.286	91.9966	229.518	43.3735								72.9167	43.2692	101.339	125.703	70.2238
94.7115	74.93	91.9966	165.261	44.5783								72.9167	46.9246	130.293	150.843	70.2238
94.8077	76.0417	91.9966	165.261	44.5783								72.9167	44.6429	166.265	115.491	75.6256
94.8077	71.5686	91.9966	247.892	44.5783								72.9167	44.6429	202.008	107.791	70.3098
94.8077	55.303	89.1566	198.313	44.5783								78.125	44.5971	303.012	115.491	70.3098
94.8077	52.8986	89.1566	165.261	44.5783								78.125	46.381	159.639	115.491	75.7183
88.0357	55.2489	89.1566	165.261	44.5783								72.9167	44.5971	200.402	124.374	75.7183
88.0357	83.9744	82.2984	165.261	44.5783								72.9167	52.7056	208.133	188.554	75.7183
87.9464	90.9722	82.2984	165.261	43.3735								68.3594	64.2157	208.133	215.491	75.7183
87.9464	86.7216	82.2057	165.261	43.3735								72.8333	54.0249	400	251.406	75.6256
87.9464	99.2424	82.2057	165.06	43.3735								57.4342	48.2639	400	207.631	81.9277
87.9464	90.4762	82.2057	165.06	43.3735								72.75	48.2639	134.94	207.631	81.9277
87.9464	90.4762	93.5743	165.06	43.3735								83.9423	52.6515	804.819	150.723	81.9277
87.9464	105.556	93.7082	118.313	44.5783								99.0909	68.1373	804.819	137.021	82.0281
87.9464	73.5931	84.3373	165.261	44.5783								109	64.3519	804.819	137.021	82.0281
87.9464	89.9471	98.996	165.261	44.5783								72.6667	57.4405	804.819	167.47	89.4852
88.0357	103.912	98.996	147.892	44.5783								77.8571	57.4405	804.819	167.47	211.747
88.0357	103.912	84.2169	147.892	44.5783								77.8571	98.4848	804.819	150.723	82.2289
94.8077	92.9894	97.2461	118.313	36.1446								109	79.2517	402.41	187.149	139.558
136.806	92.9894	113.801	118.313	36.1446								108.875	73.9683	804.819	179.346	241.566
190.208	90.9226	113.801	118.313	36.1446								127.812	149.83	803.614	215.491	161.044
190.208	103.912	89.4148	118.313	35.5422								102.25	208.929	464.458	134.839	89.7043
228.5	145.476	80.7229	118.313	43.3735								92.9545	131.25	464.458	137.13	98.6747
140.625	145.476	75.9745	118.072	43.3735								90.5208	150	573.494	167.604	109.639
588.75	145.476	80.7229	118.072	45.7831								102.375	131.25	573.494	215.491	89.7043
588.75	145.476	96.2929	147.892	45.7831								113.75	175	573.494	179.786	82.1285
141.25	129.167	92.2547	180.723	44.5783								113.75	318.651	573.494	179.786	98.5542
415.625	117.857	156.476	180.723	44.5783								131.071	83.5165	268.273	202.259	89.5947
189.792	117.857	68.6747	180.723	44.5783								148.125	72.381	168.916	215.491	89.5947
102.292	117.857	120.482	180.723	44.5783								134.643	83.5165	267.871	179.786	109.505
102.292	98.2143	120.482	155.422	44.5783								90.2083	35.5991	801.205	161.807	109.505
94.3269	117.857	254.819	110.467	43.3735								90.2083	36.7857	801.205	161.807	140.792
87.5893	98.2143	254.819	117.912	43.3735								90.2083	40.0657	800	179.786	123.193
81.8333	98.4127	509.639	126.334	43.3735								90.2083	81.6327	800	231.153	123.193
102.292	41.1817	120.482	135.959	43.3735								90.2083	105	800	231.153	82.1285
94.4231	36.0994	387.952	126.248	43.3735								83.2692	87.5	400	202.259	82.0281
94.4231	44.4303	404.819	115.1	43.3735								83.2692	87.5	400	202.259	89.4852
94.4231	45.4286	232.53	123.322	44.5783								83.2692	87.5992	400	111.145	89.4852
94.4231	77.9762	155.02	123.322	44.5783								90.2083	105	228.012	111.145	89.4852
102.292	133.673	186.024	120.389	44.5783								90.2083	105	130.293	111.069	98.4337
207.812	130.357	116.265	111.79	44.5783								90.2083	105	130.293	111.069	109.371
143.438	64.4841	103.347	115.02	44.5783								90.2083	80.7692	130.293	104.536	226.104
102.396	46.4286	103.347	107.831	44.5783								90.3125	80.7692	97.1084	98.7282	140.361
90.9821	49.256	155.02	107.831	44.5783								90.2083	102.738	130.293	98.7282	280.723
90.9821	61.2782	270.683	114.94	44.5783								90.2083	114.021	152.008	98.7282	131.325
90.9821	59.0476	270.683	105.457	43.3735								90.2083	104.63	399.398	93.532	131.325
74.8529	59.0476	169.478	102.033	43.3735								90.2083	104.63	606.024	93.532	157.59
70.6944	59.0476	387.952	102.033	45.7831								90.2083	94.1667	303.012	93.532	262.651
74.9265	60	406.627	101.958	45.7831								90.2083	119.643	134.94	93.532	196.988
74.9265	45.6667	154.618	95.9603	45.7831								90.2083	87.013	212.851	93.5954	98.4337
70.7639	47.5694	154.618	95.9603	44.5783								98.4091	87.013	138.755	93.532	89.4852
74.9265	45.6667	154.618	95.9603	44.5783								154.643	73.6264	166.506	98.7282	93.5743
70.7639	49.1905	154.618	95.9603	44.5783								154.643	95.7143	400	126.936	81.9277
70.7639	53.5197	154.618	95.9603	44.5783								154.643	87.1212	400	111.069	81.9277
67.0395	51.2897	185.542	101.958	43.3735								154.821	95.8333	136.145	104.536	89.3757
66.9737	47.3443	474.699	101.958	43.3735								216.75	113.095	136.145	98.7282	81.9277
74.8529	51.0204	231.325	101.883	43.3735								186.25	87.1212	134.94	98.7282	81.9277
74.8529	48.6542	231.325	90.5622	43.3735								313.75	106.481	804.819	88.8554	79.08
74.8529	47.2857	231.024	102.075	43.3735								98.125	170.238	803.614	88.8554	89.4852
74.8529	49.256	184.819	108.079	43.3735								75.4808	159.921	803.614	88.8554	82.0281
70.7639	50.8658	184.819	114.834	44.5783								65.3333	106.614	804.819	91.5663	75.7183
63.6875	48.6542	184.819	122.49	44.5783								65.3333	46.8944	804.819	86.747	75.7183
67.0395	41.4462	462.048	122.41	44.5783								63.2031	46.8944	804.819	84.5668	75.7183
74.9265	50.9199	308.032	131.153	44.5783								65.4167	46.8944	804.819	80.7229	75.6256
74.9265	49.2424	462.048	131.153	44.5783								65.4167	46.8944	804.819	77.2132	75.6256
74.9265	41.5344	231.024	114.834	44.5783								67.4167	59.9206	464.458	77.2132	75.6256
74.9265	40.5583	134.423	114.834	44.5783								67.4167	446.429	465.06	77.2132	75.6256
70.7639	39.2063	119.578	114.834	44.5783								59.4853	78.254	573.494	80.7229	75.6256
74.8529	39.2063	120.654	102.075	44.5783								84.2708	73.3631	573.494	80.7229	75.6256
170	39.2063	105.572	102.075	45.7831								134.464	78.254	573.494	80.7229	81.9277
67.0395	46.7262	105.572	102.075	45.7831								91.9318	94.2857	573.494	80.7229	82.0281
70.8333	42.0493	93.842	102.075	45.7831								67.4167	85.7143	287.349	80.6681	75.7183
70.7639	43.6067	93.842	96.7026	44.5783								68.3594	87.6984	267.871	80.6681	75.7183
79.6094	45.3297	113.655	96.7026	44.5783								68.3594	115.608	401.807	80.6681	75.7183
85	43.6508	106.988	96.7026	44.5783								68.3594	86.7063	401.807	84.5095	75.7183
79.6875	43.6508	85.8635	96.7026	44.5783								91.1458	74.3197	266.667	80.7229	75.6256
79.6094	43.6508	85.8635	91.8675	43.3735								72.9167	94.5887	400	80.7229	70.2238
74.9265	45.3297	85.8635	96.7026	43.3735								78.125	158.532	400	80.7229	70.2238
99.0625	40.6404	85.8635	108.079	43.3735								72.9167	85.4396	663.855	84.5668	70.2238
118.875	43.6508	85.8635	114.834	43.3735								64.2647	65.3361	266.667	77.2132	70.2238
117.361	45.3297	85.8635	114.834	43.3735								72.8333	69.4196	114.006	80.6681	75.7183
96.0417	45.3297	85.8635	114.759	43.3735								72.8333	58.4586	114.006	77.1608	75.7183
104.659	43.6949	91.9966	114.759	44.5783								72.8333	52.8912	114.006	77.1608	75.7183
98.5417	42.1344	99.0732	114.759	44.5783								72.8333	52.8912	152.008	77.1084	75.7183
104.545	42.1344	91.9966	114.759	44.5783								72.8333	63.0952	152.008	84.4521	75.7183
104.545	63.4259	91.9966	114.834	44.5783								84.1346	104.762	182.41	88.6747	75.7183
102.708	57.0833	91.9966	122.49	44.5783								91.1458	100.926	606.024	84.4521	81.9277
112.045	51.8939	97.2618	122.49	44.5783								84.1346	72.6984	606.024	84.4521	81.9277
123.25	87.7976	89.1566	122.49	44.5783								72.9167	57.3935	606.024	84.4521	81.9277
102.708	163.265	89.1566	122.49	44.5783								72.9167	52.5974	800	84.4521	81.9277
102.708	93.6813	82.2984	131.153	44.5783								68.3594	57.8571	800	82.4699	82.0281
102.708	93.6813	82.2984	122.41	45.7831								72.9167	279.365	208.133	82.4699	98.4337
102.708	81.1905	89.1566	122.41	45.7831								72.9167	48.2143	166.506	82.4699	262.651
94.8077	86.9048	89.1566	122.41	45.7831								84.1346	39.9425	800	86.8104	113.769
102.708	195.238	89.0562	122.41	44.5783								72.9167	41.7108	136.145	86.8104	89.7043
94.8077	76.0417	89.0562	131.153	44.5783								78.125	52.551	136.145	86.8104	124.096
94.8077	63.6905	93.7082	122.41	43.3735								72.9167	59.2105	803.614	86.8104	110.602
94.8077	67.5926	140.562	122.41	43.3735								68.3594	187.5	803.614	86.8738	112.909
94.8077	46.7949	84.3373	122.41	43.3735								156.071	692.857	803.614	86.8738	159.94
[truncated: 6,966 more rows]
