# Supplementary material for: Circuit mechanisms underlying embryonic retinal waves
Source: eLife. 2023 Feb 15;12:e81983. doi: 10.7554/eLife.81983 (PMC9988258; doi:10.7554/eLife.81983)
Supplement: Figure 4—source data 1. [file elife-81983-fig4-data1.xlsx]

## Sheet: Sheet1
Mean wave participation and response amplitude per field of view (Figure 4C & D)
Mean % waves cell participated					Mean response amplitude
	RGC	ipRGCs				RGC	ipRGCs
	0.670077	0.735294				0.811785	1.0045
	0.798319	0.816631				0.610702	0.817069
	0.7249	0.727083				1.11979	1.16422
	0.816739	0.840909				1.55145	1.46618
	1	1				1.93465	2.04321
	NaN	NaN				NaN	NaN
	NaN	NaN				NaN	NaN
	0.917308	0.9125				2.66401	2.30387
	0.933333	0.902222				2.04668	2.33927
	0.851546	0.9				2.14665	2.04244
	0.799454	0.851351				1.14386	1.8885
	0.957516	0.946502				1.84736	2.21833
	0.853448	0.921875				1.25743	1.81406
	0.861667	1				1.11916	2.21036
	0.813051	0.830918				1.46055	1.53976
	0.767161	0.77551				1.16642	1.62557
	0.681853	0.781818				1.63829	1.86932
	0.739516	0.8375				1.44047	2.57803
	0.735656	0.849206				2.71564	1.5924
	0.968569	0.995169				2.41515	1.95338
	0.860558	0.881356				1.54213	1.93727
	0.866487	0.840909				1.30667	1.64489
	0.947821	0.972222				1.26835	1.8049
	0.865569	0.936782				1.15156	1.78796
	0.654217	0.711934				1.08119	1.34442
	0.756742	0.807018				1.2289	1.59941
	0.870192	0.84058				1.01537	1.33659
	0.663306	0.78481				0.82718	1.40903
	0.663725	0.822222				1.10738	1.24553
