# Supplementary material for: Circuit mechanisms underlying embryonic retinal waves
Source: eLife. 2023 Feb 15;12:e81983. doi: 10.7554/eLife.81983 (PMC9988258; doi:10.7554/eLife.81983)
Supplement: Figure 5—source data 1. [file elife-81983-fig5-data1.xlsx]

## Sheet: Sheet1
Total cell count and density per retina (Figure 5C & D)
P1
	Cell Count	Density			Cell Count	Density
OCTP1211021M1L	7317	1305.51		BTOTP1220108M3L	6993	1768.43
OCTP1211021M1R	7690	1367.69		BTOTP1220124M1L	9570	1493.75
OCTP1211021M3L	8056	1300.24		BTOTP1220124M1R	4058	1599.49
OCTP1211021M3R	7947	1363.11		BTOTP1220124M2L	8831	1670.74
OCTP1220125M1R	8445	1686.75		BTOTP1220124M3L	8572	1676.63
OCTP1220125M2R	10609	1866.99		BTOTP1220209M2R	7630	1361.44
OCTP1220125M3L	10930	1986.05		BTOTP1220209M3R	8720	1555.58
OCTP1220125M4L	9265	1602.45		BTOTP1220209M4L	8521	1903.01
OCTP1220125M4R	9633	1843.5		BTOTP1220209M4R	10279	1850.93
Average		1591.37				1653.34
Std		267.661				172.701
P7
	Cell Count	Density			Cell Count	Density
OCTP1220222M1R	5227	555.789		BTOTP1211004M1R	4874	660.913
OCTP1220222M2L	5466	561.823		BTOTP1211004M2L	6366	716.716
OCTP1220222M3L	5414	536.163		BTOTP1211004M2R	6079	796.25
OCTP1220222M4R	5457	594.221		BTOTP1220222M1R	6345	768.125
OCTP1220222M5R	5428	628.107		BTOTP1220222M2L	6342	569.186
OCTP1220222M6L	5487	593.886		BTOTP1220222M2R	5053	534.948
OCTP1220222M7L	5924	597.601		BTOTP1220222M3L	5965	653.315
OCTP1220222M8R	5645	551.065		BTOTP1220222M3R	6035	723.457
Average		577.332				677.864
Std		30.7934				91.7111

## Sheet: Sheet2
BTOT P1	DN	DT	VN	VT		OCT P1	DN	DT	VN	VT		OCT P7	DN	DT	VN	VT		BTOT P7	DN	DT	VN	VT
BTOTP1220108M3L	1654	1866.96	1530.21	2032.95		OCTP1211021M1L	1447.97	1252.08	1174.24	1315.91		OCTP1220222M1R	525.694	476.953	649.286	607.727		BTOTP1211004M1R	634.722	565	716.667	707.812
BTOTP1220124M1L	1498.61	1144.44	1412.5	1730.88		OCTP1211021M1R	1344.7	1236.9	1281.25	1566.96		OCTP1220222M2L	559.649	436.047	660.294	571.635		BTOTP1211004M2L	783.974	828.488	503.289	730.612
BTOTP1220124M1R	1692.11	1626.61	1867.86	1305.36		OCTP1211021M3L	1305.65	1365.79	1450	1078.85		OCTP1220222M3L	395.833	559.896	580.804	585.317		BTOTP1211004M2R	912.162	860.294	654.487	765
BTOTP1220124M2L	1645	1695.24	1577.38	1729.84		OCTP1211021M3R	1350	1322.5	1473.68	1343.97		OCTP1220222M4R	624.554	691.667	423.98	643.269		BTOTP1220222M1R	803.488	587.179	832.5	832.5
BTOTP1220124M3L	1576.72	1937.5	1694.23	1623.91		OCTP1220125M1R	1658.33	1661.46	1690.62	1733.75		OCTP1220222M5R	516.875	547.059	663.393	762.179		BTOTP1220222M2L	552.083	667.105	399.561	663.194
BTOTP1220209M2R	1300	1477.38	1394.57	1293.06		OCTP1220125M2R	1864.66	2162.5	1872.5	1662.5		OCTP1220222M6L	425.481	646.809	576.19	756.977		BTOTP1220222M2R	572.959	628.125	520.455	449.569
BTOTP1220209M3R	1526	1539	1640.83	1494.57		OCTP1220125M3L	1995.83	1898.08	2113.16	1965		OCTP1220222M7L	488.571	616.204	598.661	649.528		BTOTP1220222M3L	453.646	798.684	639.035	781.579
BTOTP1220209M4L	1930	1815.91	1832.41	2121.88		OCTP1220125M4L	1821.43	1332.69	1598	1686.67		OCTP1220222M8R	482.065	394.022	621.759	633.197		BTOTP1220222M3R	563.158	804.375	701.136	819.375
BTOTP1220209M4R	1905.17	1822.22	1687.5	1947.41		OCTP1220125M4R	1946.43	1478.12	1896.43	1896.43		Average	502.34	546.08	596.8	651.23		Average	659.52	717.41	620.89	718.71
Average	1636.4	1658.36	1626.39	1697.76		Average	1637.22	1523.35	1616.65	1583.34		Std	72.53	104.51	77.82	72.17		Std	156.46	118.09	138.75	122.45
Std	196.8	246.62	166	300.25		Std	279.32	321.56	306.7	288.72

## Sheet: Sheet3
BTOT P1	DN	DT	VN	VT		OCT P1	DN	DT	VN	VT		OCT P7	DN	DT	VN	VT		BTOT P7	DN	DT	VN	VT
BTOTP1220108M3L	25	28	24	22		OCTP1211021M1L	37	24	33	33		OCTP1220222M1R	36	64	35	55		BTOTP1211004M1R	36	25	33	32
BTOTP1220124M1L	18	9	12	17		OCTP1211021M1R	33	21	24	28		OCTP1220222M2L	57	43	51	52		BTOTP1211004M2L	39	43	38	49
BTOTP1220124M1R	19	31	21	28		OCTP1211021M3L	31	19	29	26		OCTP1220222M3L	48	48	56	63		BTOTP1211004M2R	37	34	39	30
BTOTP1220124M2L	15	21	21	31		OCTP1211021M3R	25	30	19	29		OCTP1220222M4R	56	42	49	52		BTOTP1220222M1R	43	39	40	46
BTOTP1220124M3L	29	14	26	23		OCTP1220125M1R	15	24	24	20		OCTP1220222M5R	40	34	56	39		BTOTP1220222M2L	48	38	57	72
BTOTP1220209M2R	32	21	23	18		OCTP1220125M2R	29	22	20	32		OCTP1220222M6L	52	47	42	43		BTOTP1220222M2R	49	40	44	58
BTOTP1220209M3R	25	25	30	23		OCTP1220125M3L	30	26	19	20		OCTP1220222M7L	35	54	56	53		BTOTP1220222M3L	48	38	57	38
BTOTP1220209M4L	20	22	27	15		OCTP1220125M4L	21	26	25	30		OCTP1220222M8R	46	36	54	61		BTOTP1220222M3R	38	40	44	40
BTOTP1220209M4R	29	27	22	29		OCTP1220125M4R	28	16	28	28			46.25	46	49.88	52.25			42.25	37.13	44	45.63
Average	23.56	22	22.89	22.89			27.67	23.11	24.56	27.33

## Sheet: Sheet4
BTOT P1						OCT P1						OCT P7						BTOT P7
BTOTP1220108M3L	1768.43					OCTP1211021M1L	1305.51					OCTP1220222M1R	555.789					BTOTP1211004M1R	660.913
BTOTP1220124M1L	1493.75					OCTP1211021M1R	1367.69					OCTP1220222M2L	561.823					BTOTP1211004M2L	716.716
BTOTP1220124M1R	1599.49					OCTP1211021M3L	1300.24					OCTP1220222M3L	536.163					BTOTP1211004M2R	796.25
BTOTP1220124M2L	1670.74					OCTP1211021M3R	1363.11					OCTP1220222M4R	594.221					BTOTP1220222M1R	768.125
BTOTP1220124M3L	1676.63					OCTP1220125M1R	1686.75					OCTP1220222M5R	628.107					BTOTP1220222M2L	569.186
BTOTP1220209M2R	1361.44					OCTP1220125M2R	1866.99					OCTP1220222M6L	593.886					BTOTP1220222M2R	534.948
BTOTP1220209M3R	1555.58					OCTP1220125M3L	1986.05					OCTP1220222M7L	597.601					BTOTP1220222M3L	653.315
BTOTP1220209M4L	1903.01					OCTP1220125M4L	1602.45					OCTP1220222M8R	551.065					BTOTP1220222M3R	723.457
BTOTP1220209M4R	1850.93					OCTP1220125M4R	1843.5					Average	577.332					Average	677.864
Average	1653.34					Average	1591.37					Std	30.7934					Std	91.7111
Std	172.701					Std	267.661
